# Supplementary material
Source: Royal Society of Chemistry journal article supplement (doi:10.1039/d6ob00437g)
Supplement: d6ob00437g1.pdf [file d6ob00437g1.pdf]

**Electronic Supplementary Information for:**  
**Simple catalyst system involving boric acid and additives for the direct formation of amides  
from carboxylic acids and amines**

*Luc Boisvert\**, Maddy Whitney, Jasmine N. Mikesell, Kate Jernigan, Sarah Weiss, Miranda E.  
Roland, Emily K. Chu, Ben Smith, Paige Flentge

Department of Chemistry & Biochemistry, University of Puget Sound, Tacoma 98416,  
Washington, United States

\*Corresponding author: lboisvert@pugetsound.edu

**Table of Contents**

|                                                                                                                      |    |
|----------------------------------------------------------------------------------------------------------------------|----|
| <i>General</i> .....                                                                                                 | 2  |
| <i>Catalytic amidation screening procedure on benchmark reaction</i> .....                                           | 3  |
| <i>Table S1. Effect of Additives on the Boric Acid-Catalyzed Reaction Between Benzoic Acid and Benzylamine</i> ..... | 4  |
| <i>Gram-scale catalytic amidation procedures</i> .....                                                               | 6  |
| <i>N-Benzyl-benzamide (7)</i> .....                                                                                  | 6  |
| <i>N-(4-Butylphenyl)-2-(4-isobutylphenyl)propanamide (8)</i> .....                                                   | 8  |
| <i>N-Benzyl-N-methyl-4-phenylbutanamide (9)</i> .....                                                                | 10 |
| <i>N-Hexyl-1-naphthamide (10)</i> .....                                                                              | 12 |
| <i>N-(1,2,3,4-Tetrahydroisoquinolinyl) BOC-glycineamide (11)</i> .....                                               | 14 |
| <i>N-(1-Pyridinyl)-2-phenylacetamide (12)</i> .....                                                                  | 16 |
| <i>N-Morpholinyl-2-thiophenecarboxamide (13)</i> .....                                                               | 18 |
| <i>N-Benzyl-N-boc proline amide (3)</i> .....                                                                        | 20 |
| <i>N-Benzyl-2-(4-isobutylphenyl)propanamide (14)</i> .....                                                           | 22 |
| <i>N-Cyclohexyl-2-phenylacetamide (15)</i> .....                                                                     | 24 |
| Studies involving 2-(diethylamino)ethyl benzoate (16).....                                                           | 26 |
| <i>NMR Spectra</i> .....                                                                                             | 27 |
| <i>References</i> .....                                                                                              | 50 |

## General.

All reagents and solvents were obtained from commercial suppliers and used without further purification. Thin-layer chromatography was carried out on 0.2-mm silica gel plates, with spots detected by UV light (254 nm). Column chromatography was performed on pore size 60 Å, 230-400 mesh silica gel.

NMR spectra were recorded on a 400 MHz ECA-400 JEOL spectrometer. For  $^1\text{H}$  NMR spectra, tetramethylsilane (0.00 ppm) or residual solvent signals ( $\text{CDCl}_3$ : 7.26 ppm, acetone- $d_6$ : 2.05 ppm, DMSO- $d_6$ : 2.50 ppm) were used as internal standard. Chemical shifts ( $\delta$ ) values are reported in parts per million (ppm) downfield from TMS and coupling constants  $J$  are reported in hertz (Hz). The following abbreviations are used: s (singlet), d (doublet), t (triplet), q (quartet), quint (quintet), sext (sextet), non (nonet), dd (doublet of doublets), dt (doublet of triplets), m (multiplet), br (broad). DEPTQ ( $^{13}\text{C}$ ) NMR spectra were referenced to solvent signal ( $^{13}\text{CDCl}_3$ : 77.2 ppm, acetone- $d_6$ : 29.8 ppm, DMSO- $d_6$ : 39.5 ppm).

FT-IR spectra were recorded using a diamond attenuated total reflectance PerkinElmer UATR Two spectrometer and absorptions are reported in terms of wavenumbers ( $\tilde{\nu}$ ,  $\text{cm}^{-1}$ ).

HRMS data were obtained on a Waters Xevo G2 XS quadrupole-time of flight mass spectrometer equipped with an Atmospheric Solids Analysis Probe (ASAP). The corona pin was set to 3.0 mA and spectra were collected in continuum mode for 2 min with a solution of Leucine Enkephalin providing lockmass correction every 30 s.

Amide products **3**<sup>1</sup>, **7**<sup>2</sup>, **9**<sup>3</sup>, **11**<sup>4</sup>, **12**<sup>5</sup>, **13**<sup>6</sup>, **14**<sup>7</sup> and **15**<sup>5</sup> have previously been characterized.

### Catalytic amidation screening procedure on benchmark reaction

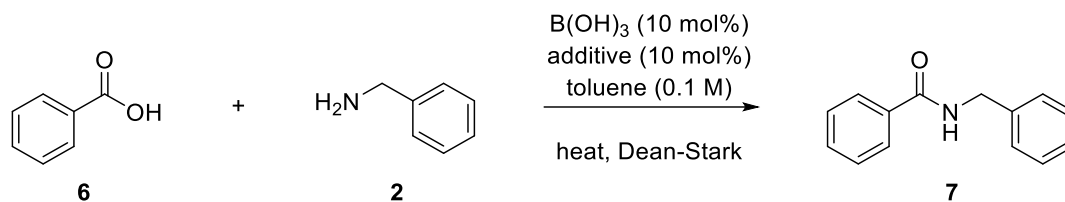

Benzoic acid **6** (0.100 g, 0.819 mmol) and boric acid (0.0051 g, 0.082 mmol, 10 mol%) were added to a flame-dried 25 mL round bottom flask with a stir bar under an inert atmosphere of  $\text{N}_2$ . When applicable, an additive (0.082 mmol, 10 mol%) was added. Toluene (8.2 mL, 0.1 M) was then added and the mixture was stirred for 10-20 minutes at room temperature. Benzylamine **2** (0.090 mL, 0.82 mmol) was added and the reaction flask was attached to a Dean-Stark apparatus connected to a Schlenk line to maintain a  $\text{N}_2$  atmosphere. The reaction flask was lowered into a 150 °C temperature-controlled oil bath. A sample (0.4 mL) was taken out of the reaction mixture with a syringe after 2 and, when the 2-hour result warranted it, 4 hours of reflux. The solvent was removed under vacuum, and  $\text{CDCl}_3$  (0.5 mL) was added. The samples were analyzed by  $^1\text{H}$  NMR spectroscopy, using a relaxation delay of 20 s. The reactant-to-product ratio was calculated using the integrations of the following resonances: benzylamine **2**  $\text{CH}_2$  singlet at ca. 3.9 ppm, and *N*-benzylbenzamide **7**  $\text{CH}_2$  doublet at ca. 4.6 ppm. Ratios reported in Table 1 and Table S1 represent the average of at least two runs.

**Table S1.** Effect of Additives on the Boric Acid-Catalyzed Reaction Between Benzoic Acid and Benzylamine<sup>a</sup>

| Entry                                             | Additive                                                  | 2/7 after 2 hours  | 2/7 after 4 hours   |
|---------------------------------------------------|-----------------------------------------------------------|--------------------|---------------------|
| 1                                                 | no catalyst                                               | 179.5:1            | 87.5:1              |
| 2                                                 | only boric acid (10 mol%), no additive                    | 24.4:1             | 6.4:1               |
| 3                                                 | only boric acid (20 mol%), no additive                    | 7.4:1              | 2.6:1               |
| <b>BRONSTED ACIDS</b>                             |                                                           |                    |                     |
| 4                                                 | phosphoric acid                                           | 156.1:1            |                     |
| 5                                                 | phosphorous acid                                          | 120.6:1            |                     |
| 6                                                 | phenylphosphonic acid                                     | 38.5:1             |                     |
| 7                                                 | phenylphosphinic acid                                     | 4.2:1              | 1.1:1               |
| 8                                                 | <i>p</i> -toluenesulfonic acid monohydrate                | 16.8:1             |                     |
| 9                                                 | sulfuric acid                                             | 1.4:1              | 1:3.5               |
| 10                                                | sulfuric acid alone, no boric acid                        | 144.3:1            |                     |
| <b>H-BONDING THIOUREA</b>                         |                                                           |                    |                     |
| 11                                                | <i>N,N'</i> -bis[3,5-bis(trifluoromethyl)phenyl]-thiourea | 16.3:1             | 6.8:1               |
| <b>AMINES, PYRIDINES, IMIDAZOLES</b>              |                                                           |                    |                     |
| 12                                                | <i>N,N</i> -diisopropylethylamine                         | 42.4:1             | 12.8:1              |
| 13                                                | <i>N,N</i> -dimethylhexylamine                            | 58.9:1             | 17.2:1              |
| 14                                                | pyridine                                                  | 12.9:1             | 1.8:1               |
| 15                                                | 2,4,6-trimethylpyridine                                   | 50.1:1             | 14.0:1              |
| 16                                                | 4-dimethylaminopyridine                                   | 19.0:1             | 4.9:1               |
| 17                                                | imidazole                                                 | 128.8:1            | 26.9:1              |
| 18                                                | 1-methyl imidazole                                        | 49.7:1             |                     |
| 19                                                | 1,8-diazabicyclo[5.4.0]undec-7-ene                        | 55.7:1             | 12.4:1              |
| <b>AMMONIUM AND PYRIDINIUM SALTS</b>              |                                                           |                    |                     |
| 20                                                | triethylammonium chloride                                 | 44.4:1             | 3.5:1               |
| 21                                                | pyridinium chloride                                       | from 1.8:1 to 86:1 | from 55:1 to 1:3.4  |
| 22                                                | pyridinium <i>p</i> -toluenesulfonate                     | from 3.7:1 to 30:1 | from 9.6:1 to 1.1:1 |
| <b>CINCHONA ALKALOIDS</b>                         |                                                           |                    |                     |
| 23                                                | quinine                                                   | 12.5:1             | 3.4:1               |
| 24                                                | quinine hydrochloride dihydrate                           | 1.7:1              | 1:4.5               |
| 25                                                | quinidine                                                 | 4.4:1              | 1.4:1               |
| 26                                                | cinchonine                                                | 2.5:1              | 1:1.4               |
| 27                                                | cinchonidine                                              | 2.5:1              | 1:1.2               |
| <b>DIAMINES</b>                                   |                                                           |                    |                     |
| 28                                                | <i>N,N,N',N'</i> -teramethylethylenediamine               | 69.7:1             | 27.9:1              |
| 29                                                | <i>N,N,N',N'</i> -tetramethyl-1,3-diaminopropane          | 67.0:1             |                     |
| 30                                                | 2,2'-bipyridine                                           | 68.1:1             |                     |
| <b>ETHYLENE GLYCOL, CATECHOLS AND OXALIC ACID</b> |                                                           |                    |                     |
| 31                                                | ethylene glycol                                           | 13.1:1             | 4.1:1               |
| 32                                                | catechol                                                  | 98.8:1             |                     |
| 33                                                | 4- <i>tert</i> -butylcatechol                             | 174.5:1            |                     |
| 34                                                | oxalic acid                                               | 81.3:1             |                     |
| <b>ACTIVE OH/SH COMPOUNDS</b>                     |                                                           |                    |                     |
| 35                                                | 2-nitrophenol                                             | 94.5:1             |                     |
| 36                                                | 4-nitrophenol                                             | 31.2:1             |                     |
| 37                                                | pentafluorophenol                                         | 98.5:1             | 31.4:1              |

|                              |                                                   |         |        |
|------------------------------|---------------------------------------------------|---------|--------|
| 38                           | 2-hydroxypyridine                                 | 17.0:1  | 8.0:1  |
| 39                           | 5-nitro-2-hydroxypyridine                         | 16.2:1  | 8.4:1  |
| 40                           | 4-hydroxypyridine                                 | 8.0:1   | 2.7:1  |
| 41                           | 8-hydroxyquinoline                                | 23.9:1  | 5.8:1  |
| 42                           | 2-hydroxypyrimidine hydrochloride                 | 9.4:1   | 2.5:1  |
| 43                           | 1-hydroxybenzotriazole monohydrate                | 1.5:1   | 1:3.3  |
| 44                           | <i>N</i> -hydroxysuccinimide                      | 1.5:1   | 1:1.9  |
| 45                           | 2-mercaptopyridine                                | 16.1:1  | 2.5:1  |
| 46                           | 2-mercaptopyrimidine                              | 44.9:1  |        |
| <b>AMINE <i>N</i>-OXIDES</b> |                                                   |         |        |
| 47                           | pyridine <i>N</i> -oxide                          | 74.1:1  | 36.9:1 |
| 48                           | 2-methylpyridine <i>N</i> -oxide                  | 82.8:1  | 13.9:1 |
| 49                           | 4-(dimethylamino)pyridine <i>N</i> -oxide hydrate | 49.6:1  |        |
| 50                           | 4-methylmorpholine <i>N</i> -oxide                | 38.4:1  | 20.8:1 |
| 51                           | 2-mercaptopyridine <i>N</i> -oxide sodium salt    | 6.9:1   | 2.3:1  |
| <b>OTHERS</b>                |                                                   |         |        |
| 52                           | triphenylphosphine                                | 74.8:1  |        |
| 53                           | trimethyl phosphite                               | 6.9:1   | 4.1:1  |
| 54                           | triethyl phosphite                                | 6.2:1   | 3.0:1  |
| 55                           | triphenyl phosphite                               | 4.6:1   | 3.7:1  |
| 56                           | hydroxylamine hydrochloride                       | 166.0:1 |        |
| 57                           | sodium iodide                                     | 22.0:1  |        |
| <b>AMINO ALCOHOLS</b>        |                                                   |         |        |
| 58                           | 2-dimethylaminoethanol                            | 1:1.3   | 1:6.3  |
| 59                           | 2-diethylaminoethanol                             | 1:1.2   | 1:6.8  |
| 60                           | 2-diethylaminoethanol alone, no boric acid        | 211.6:1 |        |
| 61                           | 2-diethylaminoethanol (5 mol%)                    | 17.4:1  | 2.8:1  |
| 62                           | 2-diethylaminoethanol (20 mol%)                   | 1:1.5   | 1:5.8  |
| 63                           | 2-(dibutylamino)ethanol                           | 16.7:1  | 3.5:1  |
| 64                           | 2-(diisopropylamino)ethanol                       | 43.8:1  | 9.8:1  |
| 65                           | 1-dimethylamino-2-propanol                        | 5.2:1   | 1.3:1  |
| 66                           | 2-morpholinoethanol                               | 6.9:1   | 1.6:1  |
| 67                           | <i>N</i> -benzyl- <i>N</i> -methyl ethanolamine   | 14.3:1  | 3.2:1  |
| 68                           | <i>N</i> -methyldiethanolamine                    | 131.8:1 | 68.9:1 |
| 69                           | <i>N</i> -phenyldiethanolamine                    | 115.9:1 |        |
| 70                           | triethanolamine                                   | 164.0:1 |        |
| 71                           | <i>N</i> -benzylethanolamine                      | 76.1:1  |        |
| 72                           | 2-{[2-(dimethylamino)ethyl]methylamino}ethanol    | 1:1.4   | 1:5.8  |
| 73                           | 3-(dimethylamino)-1,2-propanediol                 | 18.2:1  | 6.8:1  |
| 74                           | 3-dimethylamino-1-propanol                        | 1.2:1   | 1:4.3  |
| 75                           | 2-[2-(dimethylamino)ethoxy]ethanol                | 3.8:1   | 1:1.3  |

<sup>a</sup> Reaction conditions: Benzoic acid (8.2 mmol), benzylamine (8.2 mmol), boric acid (10 mol%), additive (10 mol%), toluene (0.1 M), Dean-Stark, 150 °C. Ratios, which were averaged over at least two runs, were determined by <sup>1</sup>H NMR spectroscopy.

## Gram-scale catalytic amidation procedures

### *N*-Benzyl-benzamide (7)

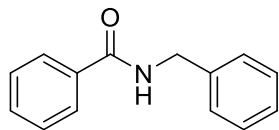

#### Gram-scale synthesis without additive

Benzoic acid (0.999 g, 8.18 mmol) and boric acid (0.0503 g, 0.814 mmol) were added to a flame-dried 250 mL round bottom flask with a stir bar under N<sub>2</sub> gas. Then toluene (82 mL) was added. The mixture was stirred for 10 minutes at room temperature, then benzylamine (0.90 mL, 8.2 mmol) was added. The reaction flask was then attached to a Dean-Stark apparatus connected to a Schlenk line to maintain a N<sub>2</sub> atmosphere. The reaction flask was lowered into a 150 °C oil bath to reflux for 8 hours. The volatiles were removed under vacuum, and the crude solid was dissolved in dichloromethane (60 mL) and washed with 1 M HCl (2 x 30 mL) and 1 M NaOH (2 x 30 mL). The aqueous layers were each extracted with dichloromethane (15 mL). The combined organic layers were dried with MgSO<sub>4</sub> and vacuum-filtered and the dichloromethane was removed under vacuum. The product was purified by flash column chromatography on silica gel (3:7 ethyl acetate/hexanes), which yielded a white solid (0.590 g, 34%).

#### Gram-scale synthesis with sulfuric acid

Benzoic acid (1.00 g, 8.19 mmol) and boric acid (0.051 g, 0.82 mmol) were added to a flame-dried 250 mL round bottom flask with a stir bar under N<sub>2</sub> gas. Then toluene (82 mL) and sulfuric acid (0.040 mL, 0.82 mmol) were added. The mixture was stirred for 10 minutes at room temperature, then benzylamine (0.90 mL, 8.2 mmol) was added. The reaction flask was then attached to a Dean-Stark apparatus connected to a Schlenk line to maintain a N<sub>2</sub> atmosphere. The reaction flask was lowered into a 150 °C oil bath to reflux for 8 hours. The volatiles were removed under vacuum, and the crude solid was dissolved in dichloromethane (60 mL) and washed with 1 M HCl (2 x 30 mL) and 1 M NaOH (2 x 30 mL). The aqueous layers were each extracted with dichloromethane (15 mL). The combined organic layers were dried with MgSO<sub>4</sub> and vacuum-filtered and the dichloromethane was removed under vacuum. The product was purified by flash column chromatography on silica gel (3:7 ethyl acetate/hexanes), which yielded a white solid (0.965 g, 56%).

### Gram-scale synthesis with 2-diethylaminoethanol

Benzoic acid (1.005 g, 8.230 mmol) and boric acid (0.0522 g, 0.844 mmol) were added to a flame-dried 250 mL round bottom flask with a stir bar under N<sub>2</sub> gas. Then toluene (82 mL) and diethylaminoethanol (0.110 mL, 0.830 mmol) were added. The mixture was stirred for 10 minutes at room temperature, then benzylamine (0.89 mL, 8.2 mmol) was added. The reaction flask was then attached to a Dean-Stark apparatus connected to a Schlenk line to maintain a N<sub>2</sub> atmosphere. The reaction flask was lowered into a 150 °C oil bath to reflux for 8 hours. The volatiles were removed under vacuum, and the crude solid was dissolved in dichloromethane (60 mL) and washed with 1 M HCl (2 x 30 mL) and 1 M NaOH (2 x 30 mL). The aqueous layers were each extracted with dichloromethane (15 mL). The combined organic layers were dried with MgSO<sub>4</sub> and vacuum-filtered and the dichloromethane was removed under vacuum. The product was purified by flash column chromatography on silica gel (3:7 ethyl acetate/hexanes), which yielded a white solid (1.495 g, 86%). <sup>1</sup>H NMR (400 MHz, CDCl<sub>3</sub>) δ 7.80-7.77 (m, 2H), 7.49 (tt, *J* = 7.4, 1.4 Hz, 1H), 7.44-7.38 (m, 2H), 7.37-7.25 (m, 5H), 6.39 (br s, 1H), 4.65 (d, *J* = 5.7 Hz, 2H). <sup>13</sup>C NMR (100 MHz, CDCl<sub>3</sub>, ppm) δ = 167.6, 138.4, 134.5, 131.7, 128.9, 128.7, 128.1, 127.8, 127.1, 44.3. IR (cm<sup>-1</sup>, solid) 3321, 3059, 3029, 2928, 1818.54, 1715, 1638, 1601, 1577, 1540, 1497, 1489, 1452, 1418, 1362, 1312, 1299, 1258, 1185, 1151, 1075, 1054, 1027, 1001, 990, 928, 902, 849, 821. HRMS for C<sub>14</sub>H<sub>14</sub>NO<sup>+</sup> (M+H<sup>+</sup>), calcd: 212.1070, found: 212.1074.

## ***N*-(4-Butylphenyl)-2-(4-isobutylphenyl)propanamide (8)**

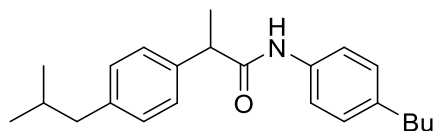

### **Gram-scale synthesis without additive**

Ibuprofen (1.692 g, 8.202 mmol) and boric acid (0.0534 g, 0.864 mmol) were added to a flame-dried 250 mL round bottom flask with a stir bar under N<sub>2</sub> gas. Then toluene (82 mL) was added. The mixture was stirred for 10 minutes at room temperature, then 4-butylaniline (1.29 mL, 8.17 mmol) was added. The reaction flask was then attached to a Dean-Stark apparatus connected to a Schlenk line to maintain a N<sub>2</sub> atmosphere. The reaction flask was lowered into a 150 °C oil bath to reflux for 24 hours. The volatiles were removed under vacuum, and the crude solid was dissolved in dichloromethane (60 mL) and washed with 1 M HCl (2 x 30 mL) and 1 M NaOH (2 x 30 mL). The aqueous layers were each extracted with dichloromethane (15 mL). The combined organic layers were dried with MgSO<sub>4</sub> and vacuum-filtered and the dichloromethane was removed under vacuum. The product was purified by flash column chromatography on silica gel (12.5% ethyl acetate/hexanes), which yielded a light orange solid (1.240 g, 48%).

### **Gram-scale synthesis with 2-diethylaminoethanol**

Ibuprofen (1.687 g, 8.177 mmol) and boric acid (0.0512 g, 0.828 mmol) were added to a flame-dried 250 mL round bottom flask with a stir bar under N<sub>2</sub> gas. Then toluene (82 mL) and diethylaminoethanol (0.110 mL, 0.830 mmol) were added. The mixture was stirred for 10 minutes at room temperature, then 4-butylaniline (1.29 mL, 8.17 mmol) was added. The reaction flask was then attached to a Dean-Stark apparatus connected to a Schlenk line to maintain a N<sub>2</sub> atmosphere. The reaction flask was lowered into a 150 °C oil bath to reflux for 24 hours. The volatiles were removed under vacuum, and the crude solid was dissolved in dichloromethane (60 mL) and washed with 1 M HCl (2 x 30 mL) and 1 M NaOH (2 x 30 mL). The aqueous layers were each extracted with dichloromethane (15 mL). The combined organic layers were dried with MgSO<sub>4</sub> and vacuum-filtered and the dichloromethane was removed under vacuum. The product was purified by flash column chromatography on silica gel (12.5% ethyl acetate/hexanes), which yielded a light orange solid (1.852 g, 67%). <sup>1</sup>H NMR (400 MHz, CDCl<sub>3</sub>) δ 7.32 (d, *J* = 8.8 Hz, 2H), 7.26 (d, *J* = 7.5 Hz, 2H), 7.17 (brs, 1H), 7.14 (d, *J* = 7.5 Hz, 2H), 7.07 (d, *J* = 8.2 Hz, 2H), 3.69 (q, *J* = 7.2 Hz, 1H), 2.54 (t, *J* = 7.6 Hz, 2H), 2.47 (d, *J* = 7.2 Hz, 2H), 1.86 (non, *J* = 6.8 Hz, 1H), 1.58 (d, *J* = 7.2 Hz, 3H), 1.54 (quint, *J* = 7.6 Hz, 2H), 1.31 (sext, *J* = 7.6 Hz, 2H), 0.91 (d, *J* = 6.8 Hz, 6H), 0.90 (t, *J*

= 7.2 Hz, 3H).  $^{13}\text{C}$  NMR (100 MHz,  $\text{CDCl}_3$ , ppm)  $\delta$  = 172.7, 141.1, 140.0, 138.3, 135.7, 129.9, 128.9, 127.5, 119.8, 47.7, 45.1, 35.1, 33.8, 30.3, 22.5, 22.3, 18.6, 14.0. IR ( $\text{cm}^{-1}$ , solid) 3301, 3193, 3127, 2956, 2924, 2868, 1658, 1603, 1531, 1513, 1459, 1410, 1374, 1356, 1303, 1245, 1174, 1118, 1069, 1023, 1006, 917, 880, 829. HRMS for  $\text{C}_{23}\text{H}_{32}\text{NO}^+$  ( $\text{M}+\text{H}^+$ ), calcd: 338.2478, found: 338.2472.

## ***N*-Benzyl-*N*-methyl-4-phenylbutanamide (9)**

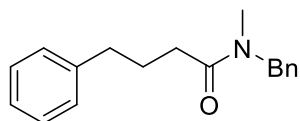

### **Gram-scale synthesis without additive**

4-Phenylbutyric acid (1.365 g, 8.313 mmol) and boric acid (0.054 g, 0.87 mmol) were added to a flame-dried 250 mL round bottom flask with a stir bar under N<sub>2</sub> gas. Then toluene (82 mL) was added. The mixture was stirred for 10 minutes at room temperature, then *N,N*-benzylmethylamine (1.05 mL, 8.14 mmol) was added. The reaction flask was then attached to a Dean-Stark apparatus connected to a Schlenk line to maintain a N<sub>2</sub> atmosphere. The reaction flask was lowered into a 150 °C oil bath to reflux for 6 hours. The volatiles were removed under vacuum, and the crude solid was dissolved in dichloromethane (60 mL) and washed with 1 M HCl (2 x 30 mL) and 1 M NaOH (2 x 30 mL). The aqueous layers were each extracted with dichloromethane (15 mL). The combined organic layers were dried with MgSO<sub>4</sub> and vacuum-filtered and the dichloromethane was removed under vacuum. The product was purified by flash column chromatography on silica gel (44:56 ethyl acetate:hexanes) which yielded (0.88 g, 40%).

### **Gram-scale synthesis with 2-diethylaminoethanol**

4-Phenylbutyric acid (1.371 g, 8.350 mmol) and boric acid (0.0517 g, 0.836 mmol) were added to a flame-dried 250 mL round bottom flask with a stir bar under N<sub>2</sub> gas. Then toluene (82 mL) and diethylaminoethanol (0.110 mL, 0.830 mmol) were added. The mixture was stirred for 10 minutes at room temperature, then *N,N*-benzylmethylamine (1.05 mL, 8.14 mmol) was added. The reaction flask was then attached to a Dean-Stark apparatus connected to a Schlenk line to maintain a N<sub>2</sub> atmosphere. The reaction flask was lowered into a 150 °C oil bath to reflux for 6 hours. The volatiles were removed under vacuum, and the crude solid was dissolved in dichloromethane (60 mL) and washed with 1 M HCl (2 x 30 mL) and 1 M NaOH (2 x 30 mL). The aqueous layers were each extracted with dichloromethane (15 mL). The combined organic layers were dried with MgSO<sub>4</sub> and vacuum-filtered and the dichloromethane was removed under vacuum. The product was purified by flash column chromatography on silica gel (44:56 ethyl acetate:hexanes) which yielded a light yellow oil (1.552 g, 70%). <sup>1</sup>H NMR, 2 rotamers (400 MHz, CDCl<sub>3</sub>) δ 7.37-7.08 (m, 10H), 4.58 (s, 1.2H), 4.44 (s, 0.8H), 2.93 (s, 1.2H), 2.82 (s, 1.8H), 2.71 (t, *J* = 7.6 Hz, 1.2H), 2.65 (t, *J* = 7.6 Hz, 0.8H), 2.36 (t, *J* = 7.6 Hz, 2H), 2.06-1.96 (m, 2H). <sup>13</sup>C NMR, 2 rotamers (100 MHz, CDCl<sub>3</sub>, ppm) δ = 173.3, 172.9, 141.9, 141.9, 137.7, 136.9, 129.0, 128.7, 128.7, 128.6, 128.5, 128.5,

128.2, 127.7, 127.4, 126.5, 126.0, 126.0, 53.5, 50.9, 35.5, 35.4, 34.9, 34.1, 32.8, 32.3, 26.9, 26.7.  
IR (cm<sup>-1</sup>, neat): 3061, 3026, 2927, 1639, 1603, 1495, 1452, 1400, 1284, 1262, 1205, 1155, 1115,  
1077, 1028, 986, 946, 910, 806. HRMS for C<sub>18</sub>H<sub>22</sub>NO<sup>+</sup> (M+H<sup>+</sup>): calcd: 268.1696, found: 268.1690.

## ***N*-Hexyl-1-naphthamide (10)**

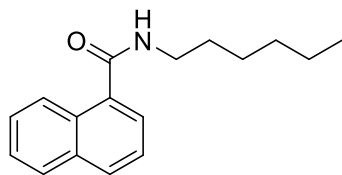

### **Gram-scale synthesis without additive**

1-Naphthoic acid (1.417 g, 8.230 mmol) and boric acid (0.0594 g, 0.961 mmol) were added to a flame-dried 250 mL round bottom flask with a stir bar under N<sub>2</sub> gas. Then toluene (82 mL) was added. The mixture was stirred for 10 minutes at room temperature, then hexylamine (1.08 mL, 8.22 mmol) was added. The reaction flask was then attached to a Dean-Stark apparatus connected to a Schlenk line to maintain a N<sub>2</sub> atmosphere. The reaction flask was lowered into a 150 °C oil bath to reflux for 12 hours. The volatiles were removed under vacuum. The crude solid was dissolved in dichloromethane (60 mL) and washed with 1 M HCl (2 x 30 mL) and 1 M NaOH (2 x 30 mL). The aqueous layers were each extracted with dichloromethane (30 mL). The combined organic layers were dried with MgSO<sub>4</sub> and vacuum-filtered and the dichloromethane was removed under vacuum. The product was purified by flash column chromatography on silica gel (30:70 ethyl acetate:hexanes) which yielded a white solid (0.966 g, 46%).

### **Gram-scale synthesis with 2-diethylaminoethanol**

1-Naphthoic acid (1.413 g, 8.207 mmol) and boric acid (0.052 g, 0.84 mmol) were added to a flame-dried 250 mL round bottom flask with a stir bar under N<sub>2</sub> gas. Then toluene (82 mL) and diethylaminoethanol (0.108 mL, 0.815 mmol) were added. The mixture was stirred for 10 minutes at room temperature, then hexylamine (1.08 mL, 8.22 mmol) was added. The reaction flask was then attached to a Dean-Stark apparatus connected to a Schlenk line to maintain a N<sub>2</sub> atmosphere. The reaction flask was lowered into a 150 °C oil bath to reflux for 12 hours. The volatiles were removed under vacuum. The crude solid was dissolved in dichloromethane (60 mL) and washed with 1 M HCl (2 x 30 mL) and 1 M NaOH (2 x 30 mL). The aqueous layers were each extracted with dichloromethane (30 mL). The combined organic layers were dried with MgSO<sub>4</sub> and vacuum-filtered and the dichloromethane was removed under vacuum. The product was purified by flash column chromatography on silica gel (20:80 ethyl acetate:hexanes) which yielded a white solid (1.309 g, 63%). <sup>1</sup>H NMR (400 MHz, acetone-*d*<sub>6</sub>) δ 8.38-8.32 (m, 1H), 7.99-7.91 (m, 2H), 7.63 (br s, 1H), 7.61 (dd, *J* = 7.0, 1.2 Hz, 1H), 7.56-7.51 (m, 2H), 7.49 (dd, *J* = 8.2, 7.1 Hz, 1H), 3.48 (q, *J* = 6.8 Hz, 2H), 1.68 (quint, *J* = 7.2 Hz, 2H), 1.50-1.41 (m, 2H), 1.40-1.30 (m, 4H), 0.91 (t, *J* = 7.2

Hz, 3H).  $^{13}\text{C}$  NMR (100 MHz, acetone- $d_6$ , ppm)  $\delta$  = 169.5, 136.5, 134.6, 131.3, 130.6, 129.0, 127.3, 127.0, 126.7, 125.7, 125.7, 40.3, 32.3, 30.4, 27.4, 23.3, 14.3. IR ( $\text{cm}^{-1}$ , solid): 3259, 3064, 2929, 2860, 1631, 1618, 1591, 1581, 1552, 1507, 1466, 1455, 1377, 1334, 1316, 1260, 1219, 1154, 1019, 973, 955, 897, 811. HRMS for  $\text{C}_{17}\text{H}_{22}\text{NO}^+$  ( $\text{M}+\text{H}^+$ ): calcd: 256.1696, found: 256.1694.

### ***N*-(1,2,3,4-Tetrahydroisoquinolinyl) BOC-glycineamide (11)**

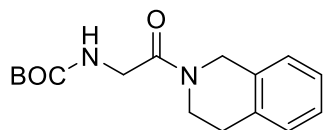

#### **Gram-scale synthesis without additive**

Boc-Gly-OH (1.436 g, 8.197 mmol) and boric acid (0.0522 g, 0.844 mmol) were added to a flame-dried 250 mL round bottom flask with a stir bar under N<sub>2</sub> gas. Then toluene (82 mL) was added. The mixture was stirred for 10 minutes at room temperature, then 1,2,3,4,-tetrahydroisoquinoline (1.03 mL, 8.23 mmol) was added. The reaction flask was then attached to a Dean-Stark apparatus connected to a Schlenk line to maintain a N<sub>2</sub> atmosphere. The reaction flask was lowered into a 150 °C oil bath to reflux for 8 hours. The volatiles were removed under vacuum, and the crude solid was dissolved in dichloromethane (60 mL) and washed with 0.5 M HCl (2 x 30 mL) and 1 M NaOH (2 x 30 mL). The aqueous layers were each extracted with dichloromethane (30 mL). The combined organic layers were dried with MgSO<sub>4</sub> and vacuum-filtered and the dichloromethane was removed under vacuum. The product was purified by flash column chromatography on silica gel (4:6 ethyl acetate/hexanes), which yielded a white solid (0.980 g, 41%).

#### **Gram-scale synthesis with diethylamino ethanol**

Boc-Gly-OH (1.437 g, 8.203 mmol) and boric acid (0.0517 g, 0.836 mmol) were added to a flame-dried 250 mL round bottom flask with a stir bar under N<sub>2</sub> gas. Then toluene (82 mL) and diethylamino ethanol (0.108 mL, 0.815 mmol) were added. The mixture was stirred for 10 minutes at room temperature, then 1,2,3,4-tetrahydroisoquinoline (1.03 mL, 8.23 mmol) was added. The reaction flask was then attached to a Dean-Stark apparatus connected to a Schlenk line to maintain a N<sub>2</sub> atmosphere. The reaction flask was lowered into a 150 °C oil bath to reflux for 8 hours. The volatiles were removed under vacuum, and the crude solid was dissolved in dichloromethane (60 mL) and washed with 0.5 M HCl (2 x 30 mL) and 1 M NaOH (2 x 30 mL). The aqueous layers were each extracted with dichloromethane (30 mL). The combined organic layers were dried with MgSO<sub>4</sub> and vacuum-filtered and the dichloromethane was removed under vacuum. The product was purified by flash column chromatography on silica gel (4:6 ethyl acetate/hexanes), which yielded a white solid (2.149 g, 90%). <sup>1</sup>H NMR, 2 rotamers (400 MHz, CDCl<sub>3</sub>) δ 7.25-7.05 (m, 4H), 5.57 (br s, 1H), 4.74 (s, 1.1H), 4.54 (s, 0.9H), 4.09-4.01 (m, 2H), 3.84 (t, *J* = 6.0 Hz, 0.9H),

3.61 (t,  $J = 6.0$  Hz, 1.1H), 2.91 (t,  $J = 6.0$  Hz, 1.1H), 2.87 (t,  $J = 6.0$  Hz, 0.9H), 1.46 (s, 9H).  $^{13}\text{C}$  NMR, 2 rotamers (100 MHz,  $\text{CDCl}_3$ , ppm)  $\delta = 167.5, 156.0, 134.9, 134.0, 133.0, 131.9, 129.1, 128.5, 127.3, 127.0, 126.9, 126.8, 126.3, 79.9, 46.1, 44.6, 42.9, 42.7, 42.2, 40.3, 29.3, 28.5, 28.5$ . IR ( $\text{cm}^{-1}$ , solid): 3277, 3033, 2977, 2932, 1704, 1632, 1581, 1525, 1497, 1484, 1461, 1452, 1430, 1404, 1387, 1362, 1291, 1273, 1249, 1222, 1206, 1167, 1109, 1066, 1044, 1027, 1004, 983, 942, 916, 867, 828, 809. HRMS for  $\text{C}_{16}\text{H}_{23}\text{N}_2\text{O}_3^+$  ( $\text{M}+\text{H}^+$ ): calcd: 291.1703, found: 291.1700.

## ***N*-(1-Pyridinyl)-2-phenylacetamide (12)**

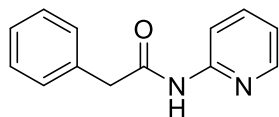

### **Gram-scale synthesis without additive**

Phenylacetic acid (1.117 g, 8.204 mmol) and boric acid (0.0501 g, 0.810 mmol) were added to a flame-dried 250 mL round bottom flask with a stir bar under N<sub>2</sub> gas. Then p-xylene (82 mL) was added. The mixture was stirred for 10 minutes at room temperature, then 2-aminopyridine (0.772 g, 8.20 mmol) was added. The reaction flask was then attached to a Dean-Stark apparatus connected to a Schlenk line to maintain a N<sub>2</sub> atmosphere. The reaction flask was lowered into a 190 °C oil bath to reflux for 48 hours. The volatiles were removed under vacuum, and the crude solid was dissolved in dichloromethane (60 mL) and washed with 1 M NaOH (2 x 30 mL). The aqueous layers were each extracted with dichloromethane (15 mL). The combined organic layers were dried with MgSO<sub>4</sub> and vacuum-filtered and the dichloromethane was removed under vacuum. The product was purified by flash column chromatography on silica gel (3:7 ethyl acetate:hexanes) which yielded a light yellow solid (1.076 g, 62%).

### **Gram-scale synthesis with 2-diethylaminoethanol**

Phenylacetic acid (1.114 g, 8.182 mmol) and boric acid (0.0566 g, 0.915 mmol) were added to a flame-dried 250 mL round bottom flask with a stir bar under N<sub>2</sub> gas. Then p-xylene (82 mL) and diethylaminoethanol (0.109 mL, 0.822 mmol) were added. The mixture was stirred for 10 minutes at room temperature, then 2-aminopyridine (0.772 g, 8.20 mmol) was added. The reaction flask was then attached to a Dean-Stark apparatus connected to a Schlenk line to maintain a N<sub>2</sub> atmosphere. The reaction flask was lowered into a 190 °C oil bath to reflux for 48 hours. The volatiles were removed under vacuum, and the crude solid was dissolved in dichloromethane (60 mL) and washed with 1 M NaOH (2 x 30 mL). The aqueous layers were each extracted with dichloromethane (15 mL). The combined organic layers were dried with MgSO<sub>4</sub> and vacuum-filtered and the dichloromethane was removed under vacuum. The product was purified by flash column chromatography on silica gel (3:7 ethyl acetate:hexanes) which yielded a light yellow solid (1.336 g, 77%). <sup>1</sup>H NMR (400 MHz, CDCl<sub>3</sub>) δ 8.35 (br s, 1H), 8.25-8.19 (m, 2H), 7.70-7.65 (m, 1H), 7.41-7.34 (m, 2H), 7.34-7.28 (m, 3H), 7.01 (ddd, *J* = 7.3, 4.9, 1.0 Hz, 1H), 3.74 (s, 2H). <sup>13</sup>C NMR (100 MHz, CDCl<sub>3</sub>, ppm) δ = 169.8, 151.5, 147.8, 138.6, 134.1, 129.6, 129.3, 127.8, 120.0, 114.3, 45.0. IR (cm<sup>-1</sup>, solid) 3231, 3050, 1657, 1599, 1578, 1533, 1495, 1458, 1432, 1325, 1291,

1240, 1196, 1149, 1097, 1073, 1032, 913, 881, 811. HRMS for  $C_{13}H_{13}N_2O^+$  ( $M+H^+$ ): calcd: 213.1022, found: 213.1038.

### ***N*-Morpholinyl-2-thiophenecarboxamide (13)**

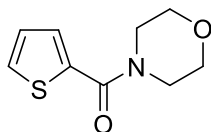

#### **Gram-scale synthesis without additive**

2-Thiophenecarboxylic acid (1.060 g, 8.272 mmol) and boric acid (0.0571 g, 0.923 mmol) were added to a flame-dried 250 mL round bottom flask with a stir bar under N<sub>2</sub> gas. Then toluene (82 mL) was added. The mixture was stirred for 10 minutes at room temperature, then morpholine (0.710 mL, 8.12 mmol) was added. The reaction flask was then attached to a Dean-Stark apparatus connected to a Schlenk line to maintain a N<sub>2</sub> atmosphere. The reaction flask was lowered into a 150 °C oil bath to reflux for 28 hours. The volatiles were removed under vacuum, and the crude solid was dissolved in dichloromethane (60 mL) and washed with 1 M NaOH (2 x 30 mL). The aqueous layers were each extracted with dichloromethane (15 mL). The combined organic layers were dried with MgSO<sub>4</sub> and vacuum-filtered and the dichloromethane was removed under vacuum. The product was purified by flash column chromatography on silica gel (33:67 ethyl acetate:hexanes) which yielded a light brown oil (1.020 g, 63%).

#### **Gram-scale synthesis with 2-diethylaminoethanol**

2-Thiophenecarboxylic acid (1.052 g, 8.209 mmol) and boric acid (0.0524 g, 0.847 mmol) were added to a flame-dried 250 mL round bottom flask with a stir bar under N<sub>2</sub> gas. Then toluene (82 mL) and diethylaminoethanol (0.110 mL, 0.830 mmol) were added. The mixture was stirred for 10 minutes at room temperature, then morpholine (0.710 mL, 8.12 mmol) was added. The reaction flask was then attached to a Dean-Stark apparatus connected to a Schlenk line to maintain a N<sub>2</sub> atmosphere. The reaction flask was lowered into a 150 °C oil bath to reflux for 36 hours. The volatiles were removed under vacuum, and the crude solid was dissolved in dichloromethane (60 mL) and washed with 1 M NaOH (2 x 30 mL). The aqueous layers were each extracted with dichloromethane (15 mL). The combined organic layers were dried with MgSO<sub>4</sub> and vacuum-filtered and the dichloromethane was removed under vacuum. The product was purified by flash column chromatography on silica gel (4:6 ethyl acetate:hexanes) which yielded a light brown oil (1.288 g, 80%). <sup>1</sup>H NMR (400 MHz, CDCl<sub>3</sub>) δ 7.46 (dd, *J* = 5.0, 1.1 Hz, 1H), 7.29 (dd, *J* = 3.7, 1.1 Hz, 1H), 7.05 (dd, *J* = 5.0, 3.7 Hz, 1H), 3.79-3.69 (m, 8H). <sup>13</sup>C NMR (100 MHz, CDCl<sub>3</sub>, ppm) δ = 163.8, 136.7, 128.1, 129.0, 126.9, 67.0. IR (cm<sup>-1</sup>, solid) 3112, 2973, 2914, 2853, 1611, 1520,

1446, 1429, 1407, 1362, 1344, 1305, 1269, 1253, 1129, 1113, 1105, 1068, 1022, 1000, 929, 873, 853, 822. HRMS for  $C_9H_{12}NO_2S^+$  ( $M+H^+$ ): calcd: 198.0583, found: 198.0577.

### ***N*-Benzyl-*N*-boc proline amide (3)**

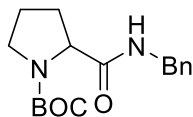

#### **Gram-scale synthesis without additive**

Boc-proline (1.571 g, 7.298 mmol) and boric acid (0.0457 g, 0.739 mmol) were added to a flame-dried 250 mL round bottom flask with a stir bar under N<sub>2</sub> gas. Then toluene (73 mL) was added. The mixture was stirred for 10 minutes at room temperature, then benzylamine (0.796 mL, 0.729 mmol) was added. The reaction flask was then attached to a Dean-Stark apparatus connected to a Schlenk line to maintain a N<sub>2</sub> atmosphere. The reaction flask was lowered into a 150 °C oil bath to reflux for hours. The volatiles were removed under vacuum, and an <sup>1</sup>H NMR spectrum of the crude reaction mixture was acquired in DMSO-*d*<sub>6</sub>. The crude solid was dissolved in dichloromethane (60 mL) and washed with 1 M NaOH (2 x 30 mL). The aqueous layers were each extracted with dichloromethane (15 mL). The combined organic layers were dried with MgSO<sub>4</sub> and vacuum-filtered and the dichloromethane was removed under vacuum. The product was purified by flash column chromatography on silica gel (44% ethylacetate/hexane) which yielded a white solid (1.634 g, 74%).

#### **Gram-scale synthesis with 2-diethylaminoethanol**

Boc-proline (1.797 g, 8.348 mmol) and boric acid (0.0521 g, 0.843 mmol) were added to a flame-dried 250 mL round bottom flask with a stir bar under N<sub>2</sub> gas. Then toluene (82 mL) and diethylaminoethanol (0.110 mL, 0.830 mmol) were added. The mixture was stirred for 10 minutes at room temperature, then benzylamine (0.900 mL, 8.24 mmol) was added. The reaction flask was then attached to a Dean-Stark apparatus connected to a Schlenk line to maintain a N<sub>2</sub> atmosphere. The reaction flask was lowered into a 150 °C oil bath to reflux for hours. The volatiles were removed under vacuum, and an <sup>1</sup>H NMR spectrum of the crude reaction mixture was acquired in DMSO-*d*<sub>6</sub>. The crude solid was dissolved in dichloromethane (60 mL) and washed with 1 M NaOH (2 x 30 mL). The aqueous layers were each extracted with dichloromethane (15 mL). The combined organic layers were dried with MgSO<sub>4</sub> and vacuum-filtered and the dichloromethane was removed under vacuum. The product was purified by flash column chromatography on silica gel (44% ethylacetate/hexane) which yielded a white solid (2.035 g, 81%). <sup>1</sup>H NMR, mixture of rotamers (400 MHz, CDCl<sub>3</sub>) δ = 7.37-7.20 (m, 5H), 6.35 (br s, 1H), 4.68-4.20 (m, 3H), 3.54-3.26 (m, 2H), 2.48-1.80 (m, 4H), 1.52-1.26 (m, 9H). <sup>13</sup>C NMR, mixture of rotamers (100 MHz, DMSO-

$d_6$ , ppm)  $\delta$  = 172.7, 172.5, 153.9, 153.6, 139.7, 128.3, 127.4, 126.9, 126.9, 126.7, 78.8, 78.7, 60.1, 59.9, 46.8, 46.6, 42.2, 41.9, 31.2, 30.2, 28.3, 28.1, 24.1, 23.3. IR ( $\text{cm}^{-1}$ , solid) = 3314, 2978, 2873, 1682, 1652, 1529, 1497, 1479, 1454, 1424, 1393, 1371, 1323, 1293, 1269, 1248, 1229, 1201, 1168, 1158, 1128, 1111, 1078, 1029, 1017, 974, 920, 899, 882, 872, 848, 827. HRMS for  $\text{C}_{17}\text{H}_{25}\text{N}_2\text{O}_3^+$  ( $\text{M}+\text{H}^+$ ): calcd: 305.1860, found: 305.1873.

## ***N*-Benzyl-2-(4-isobutylphenyl)propanamide (14)**

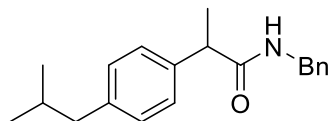

### **Gram-scale synthesis without additive**

Ibuprofen (1.965 g, 9.525 mmol) and boric acid (0.0512 g, 0.828 mmol) were added to a flame-dried 250 mL round bottom flask with a stir bar under N<sub>2</sub> gas. Then toluene (82 mL) was added. The mixture was stirred for 10 minutes at room temperature, then benzylamine (0.890 mL, 8.15 mmol) was added. The reaction flask was then attached to a Dean-Stark apparatus connected to a Schlenk line to maintain a N<sub>2</sub> atmosphere. The reaction flask was lowered into a 150 °C oil bath to reflux for 8 hours. The volatiles were removed under vacuum, and the crude solid was dissolved in dichloromethane (60 mL) and washed with 1 M HCl (2 x 30 mL) and 1 M NaOH (2 x 30 mL). The aqueous layers were each extracted with dichloromethane (15 mL). The combined organic layers were dried with MgSO<sub>4</sub> and vacuum-filtered and the dichloromethane was removed under vacuum. The product was purified by flash column chromatography on silica gel (3:7 ethyl acetate:hexanes) which yielded a yellow, waxy solid (1.752 g, 62%).

### **Gram-scale synthesis with 2-diethylaminoethanol**

Ibuprofen (1.691 g, 8.197 mmol) and boric acid (0.0507 g, 0.820 mmol) were added to a flame-dried 250 mL round bottom flask with a stir bar under N<sub>2</sub> gas. Then toluene (82 mL) and dimethylaminoethanol (0.110 mL, 0.830 mmol) were added. The mixture was stirred for 10 minutes at room temperature, then benzylamine (0.890 mL, 8.15 mmol) was added. The reaction flask was then attached to a Dean-Stark apparatus connected to a Schlenk line to maintain a N<sub>2</sub> atmosphere. The reaction flask was lowered into a 150 °C oil bath to reflux for 8 hours. The volatiles were removed under vacuum, and the crude solid was dissolved in dichloromethane (60 mL) and washed with 1 M HCl (2 x 30 mL) and 1 M NaOH (2 x 30 mL). The aqueous layers were each extracted with dichloromethane (15 mL). The combined organic layers were dried with MgSO<sub>4</sub> and vacuum-filtered and the dichloromethane was removed under vacuum. The product was purified by flash column chromatography on silica gel (3:7 ethyl acetate:hexanes) which yielded a yellow, waxy solid (2.020 g, 83%). <sup>1</sup>H NMR (400 MHz, CDCl<sub>3</sub>) δ 7.25-7.19 (m, 5H), 7.12-7.09 (m, 4H), 5.68 (br s, 1H), 4.38 (d, *J* = 5.9 Hz, 2H), 3.57 (q, *J* = 7.1 Hz, 1H), 2.45 (d, *J* = 7.1 Hz, 2H), 1.83 (non, *J* = 6.9 Hz, 1H), 1.54 (d, *J* = 7.3 Hz, 3H), 0.88 (d, *J* = 6.8 Hz, 6H). <sup>13</sup>C NMR (100 MHz, CDCl<sub>3</sub>, ppm) δ = 174.5, 141.0, 138.6, 138.5, 129.8, 128.7, 127.5, 127.5, 47.0,

45.2, 43.7, 30.3, 22.5, 18.6. IR ( $\text{cm}^{-1}$ , solid) 3272, 3087, 3029, 2955, 2923, 2866, 1644, 1608, 1558, 1510, 1496, 1453, 1420, 1364, 1353, 1325, 1303, 1265, 1240, 1186, 1166, 1111, 1073, 1027, 1017, 991, 907, 882, 852. HRMS for  $\text{C}_{20}\text{H}_{26}\text{NO}^+$  ( $\text{M}+\text{H}^+$ ), calcd: 296.2009, found: 296.2012.

### ***N*-Cyclohexyl-2-phenylacetamide (15)**

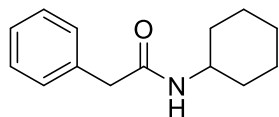

#### **Gram-scale synthesis without additive**

Phenylacetic acid (1.119 g, 8.219 mmol) and boric acid (0.054 g, 0.87 mmol) were added to a flame-dried 250 mL round bottom flask with a stir bar under N<sub>2</sub> gas. Then toluene (82 mL) was added. The mixture was stirred for 10 minutes at room temperature, then cyclohexylamine (0.94 mL, 8.2 mmol) was added. The reaction flask was then attached to a Dean-Stark apparatus connected to a Schlenk line to maintain a N<sub>2</sub> atmosphere. The reaction flask was lowered into a 150 °C oil bath to reflux for 8 hours. The volatiles were removed under vacuum, and the crude solid was dissolved in dichloromethane (60 mL) and washed with 1 M HCl (2 x 30 mL) and 1 M NaOH (2 x 30 mL). The aqueous layers were each extracted with dichloromethane (15 mL). The combined organic layers were dried with MgSO<sub>4</sub> and vacuum-filtered and the dichloromethane was removed under vacuum. The product was purified by flash column chromatography on silica gel (4:6 ethyl acetate:hexanes) which yielded a white solid (0.987 g, 55%).

#### **Gram-scale synthesis with 2-diethylaminoethanol**

Phenylacetic acid (1.116 g, 8.190 mmol) and boric acid (0.0509 g, 0.823 mmol) were added to a flame-dried 250 mL round bottom flask with a stir bar under N<sub>2</sub> gas. Then toluene (82 mL) and diethylaminoethanol (0.108 mL, 0.815 mol) was added. The mixture was stirred for 10 minutes at room temperature, then cyclohexylamine (0.81 mL, 7.1 mmol) was added. The reaction flask was then attached to a Dean-Stark apparatus connected to a Schlenk line to maintain a N<sub>2</sub> atmosphere. The reaction flask was lowered into a 150 °C oil bath to reflux for 11 hours. The volatiles were removed under vacuum, and the crude solid was dissolved in dichloromethane (60 mL) and washed with 1 M HCl (2 x 30 mL) and 1 M NaOH (2 x 30 mL). The aqueous layers were each extracted with dichloromethane (15 mL). The combined organic layers were dried with MgSO<sub>4</sub> and vacuum-filtered and the dichloromethane was removed under vacuum. The product was purified by flash column chromatography on silica gel (35% ethyl acetate:hexanes) which yielded a white solid (1.421 g, 92%). <sup>1</sup>H NMR (400 MHz, CDCl<sub>3</sub>) δ 7.38-7.32 (m, 2H), 7.31-7.21 (m, 3H), 5.28 (br s, 1H), 3.81-3.70 (m, 1H), 3.54 (s, 2H), 1.88-1.78 (m, 2H), 1.66-1.51 (m, 3H), 1.38-1.24 (m, 2H), 1.16-0.94 (m, 3H). <sup>13</sup>C NMR (100 MHz, CDCl<sub>3</sub>, ppm) δ = 170.1, 135.3, 129.5, 129.1, 127.4, 48.3, 44.1, 33.0, 25.6, 24.8. IR (cm<sup>-1</sup>, solid) 3268, 3084, 3027, 2930, 2853, 1666, 1634, 1603, 1554,

1495, 1447, 1432, 1350, 1257, 1170, 1155, 1100, 1073, 1031, 986, 966, 892, 844, 803. HRMS for  $C_{14}H_{20}NO^+$  ( $M+H^+$ ), calcd: 218.1539, found: 218.1539.

## Studies involving 2-(diethylamino)ethyl benzoate (**16**)

### Synthesis:

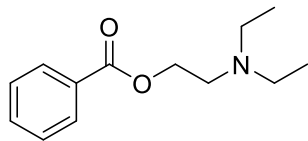

Compound **16** was synthesized by a previously published method.<sup>8</sup> <sup>1</sup>H NMR (400 MHz, CDCl<sub>3</sub>)  $\delta$  8.07-8.03 (m, 2H), 7.58-7.52 (m, 1H), 7.47-7.41 (m, 2H), 4.40 (t,  $J$  = 6.3 Hz, 2H), 2.01 (t,  $J$  = 6.3 Hz, 2H), 2.64 (q,  $J$  = 7.1 Hz, 4H), 1.07 (t,  $J$  = 7.1 Hz, 6H). <sup>13</sup>C NMR (100 MHz, CDCl<sub>3</sub>, ppm)  $\delta$  = 166.7, 133.0, 130.4, 129.7, 128.4, 63.5, 51.1, 48.1, 12.2

### Reaction of **16** with benzylamine

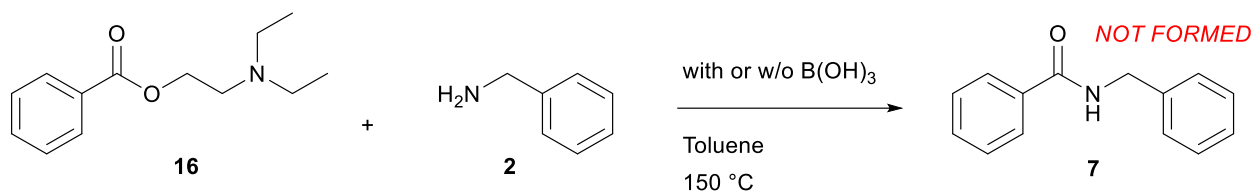

2-(Diethylamino)ethyl benzoate **16** (0.112 g, 0.506 mmol), benzylamine **2** (0.055 mL, 0.506 mmol) and toluene (5.0 mL) were added to a flame-dried 25 mL round bottom flask with a stir bar under N<sub>2</sub> gas. The reaction flask was attached to a reflux condenser connected to a Schlenk line to maintain a N<sub>2</sub> atmosphere and lowered into a 150 °C temperature-controlled oil bath. A sample (0.4 mL) was taken out of the reaction mixture with a syringe after 4 hours of reflux. The solvent was removed under vacuum, and CDCl<sub>3</sub> (0.5 mL) was added. The sample was analyzed by <sup>1</sup>H NMR spectroscopy, which did not show the presence of any *N*-benzylbenzamide **7**.

Boric acid (0.0031 g, 0.0501 mmol) was added to the reaction mixture, which was refluxed for a further 4 hours. NMR analysis of a 0.4 mL sample prepared as above did not reveal the presence of any *N*-benzylbenzamide **7**.

## **NMR Spectra**

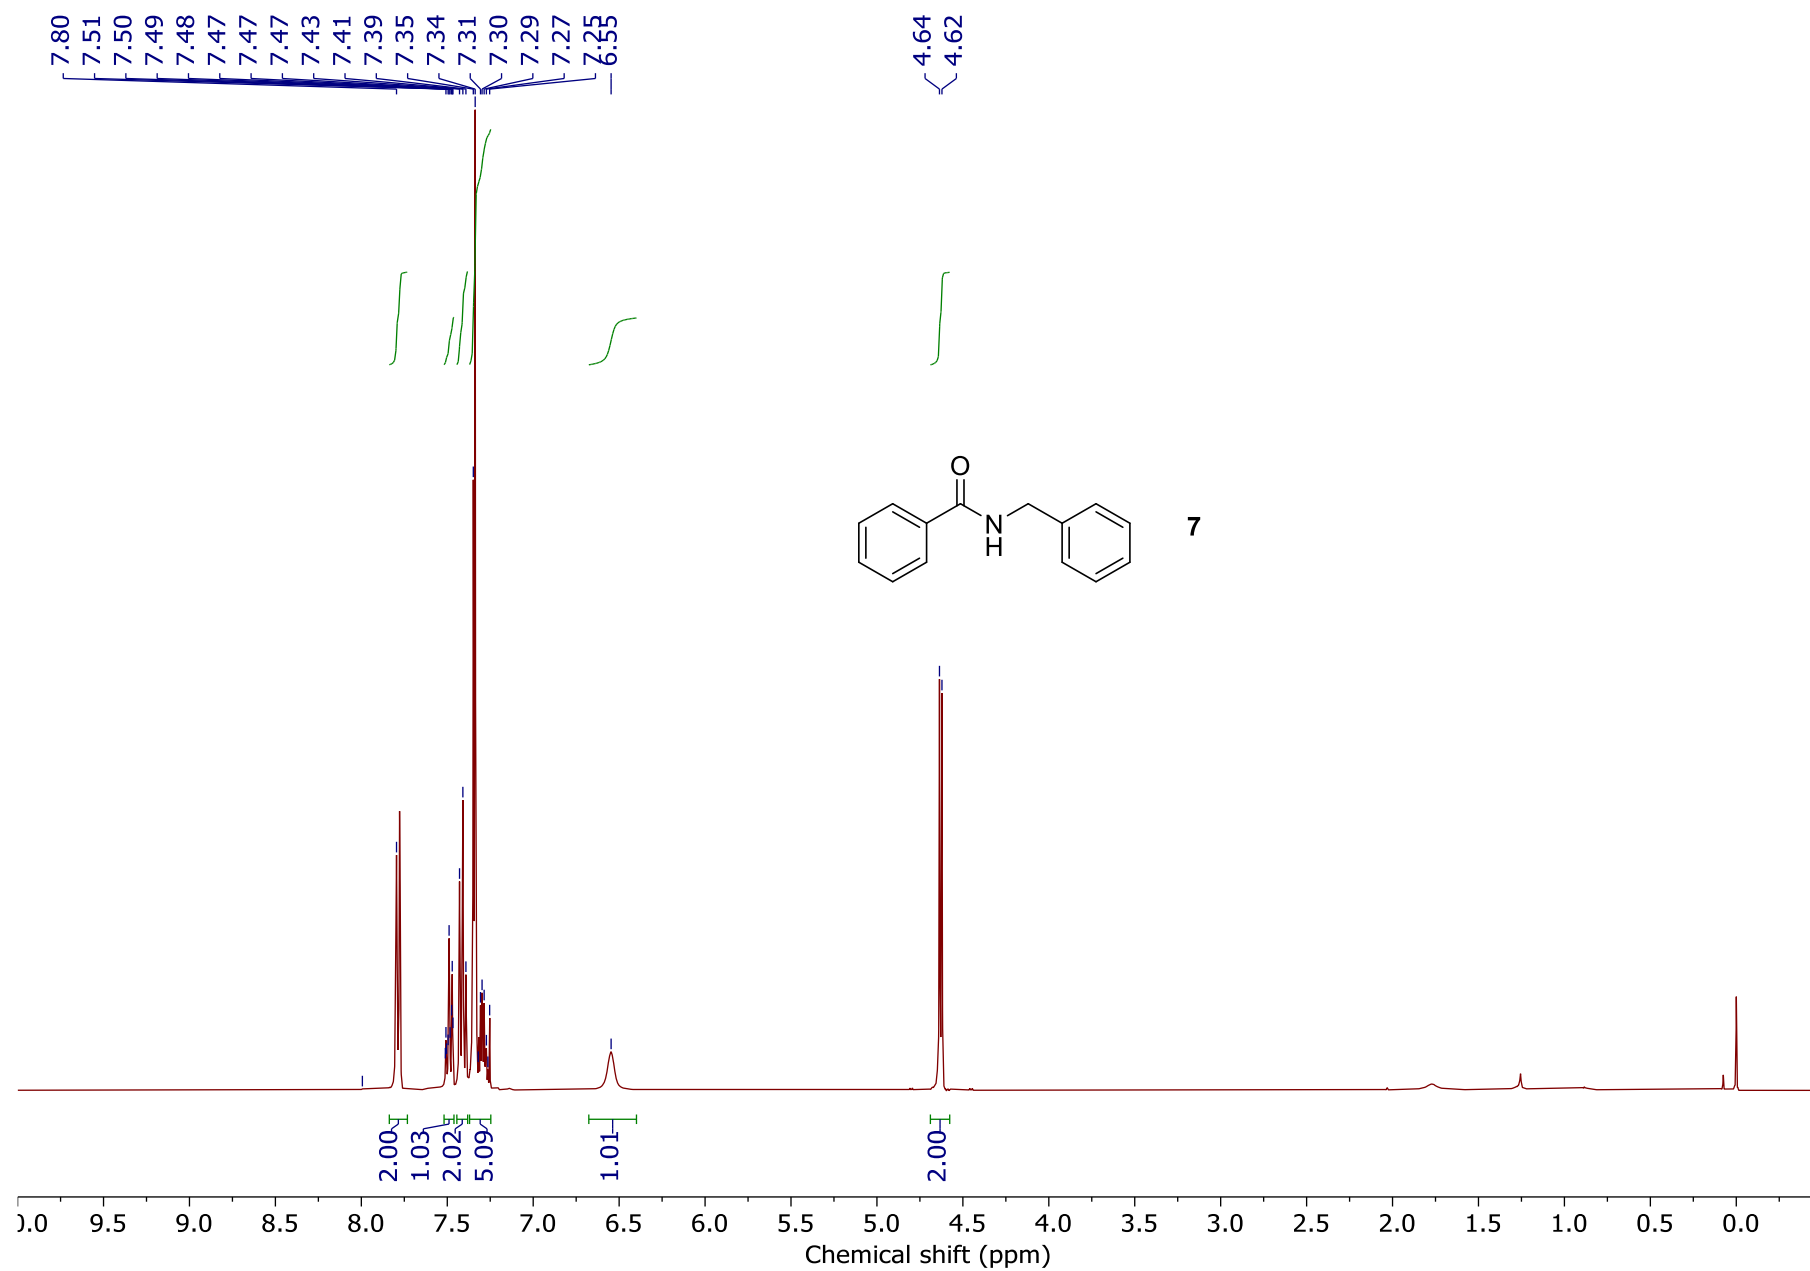

**Figure S1a.** <sup>1</sup>H NMR spectrum of compound 7 (400 MHz, CDCl<sub>3</sub>).

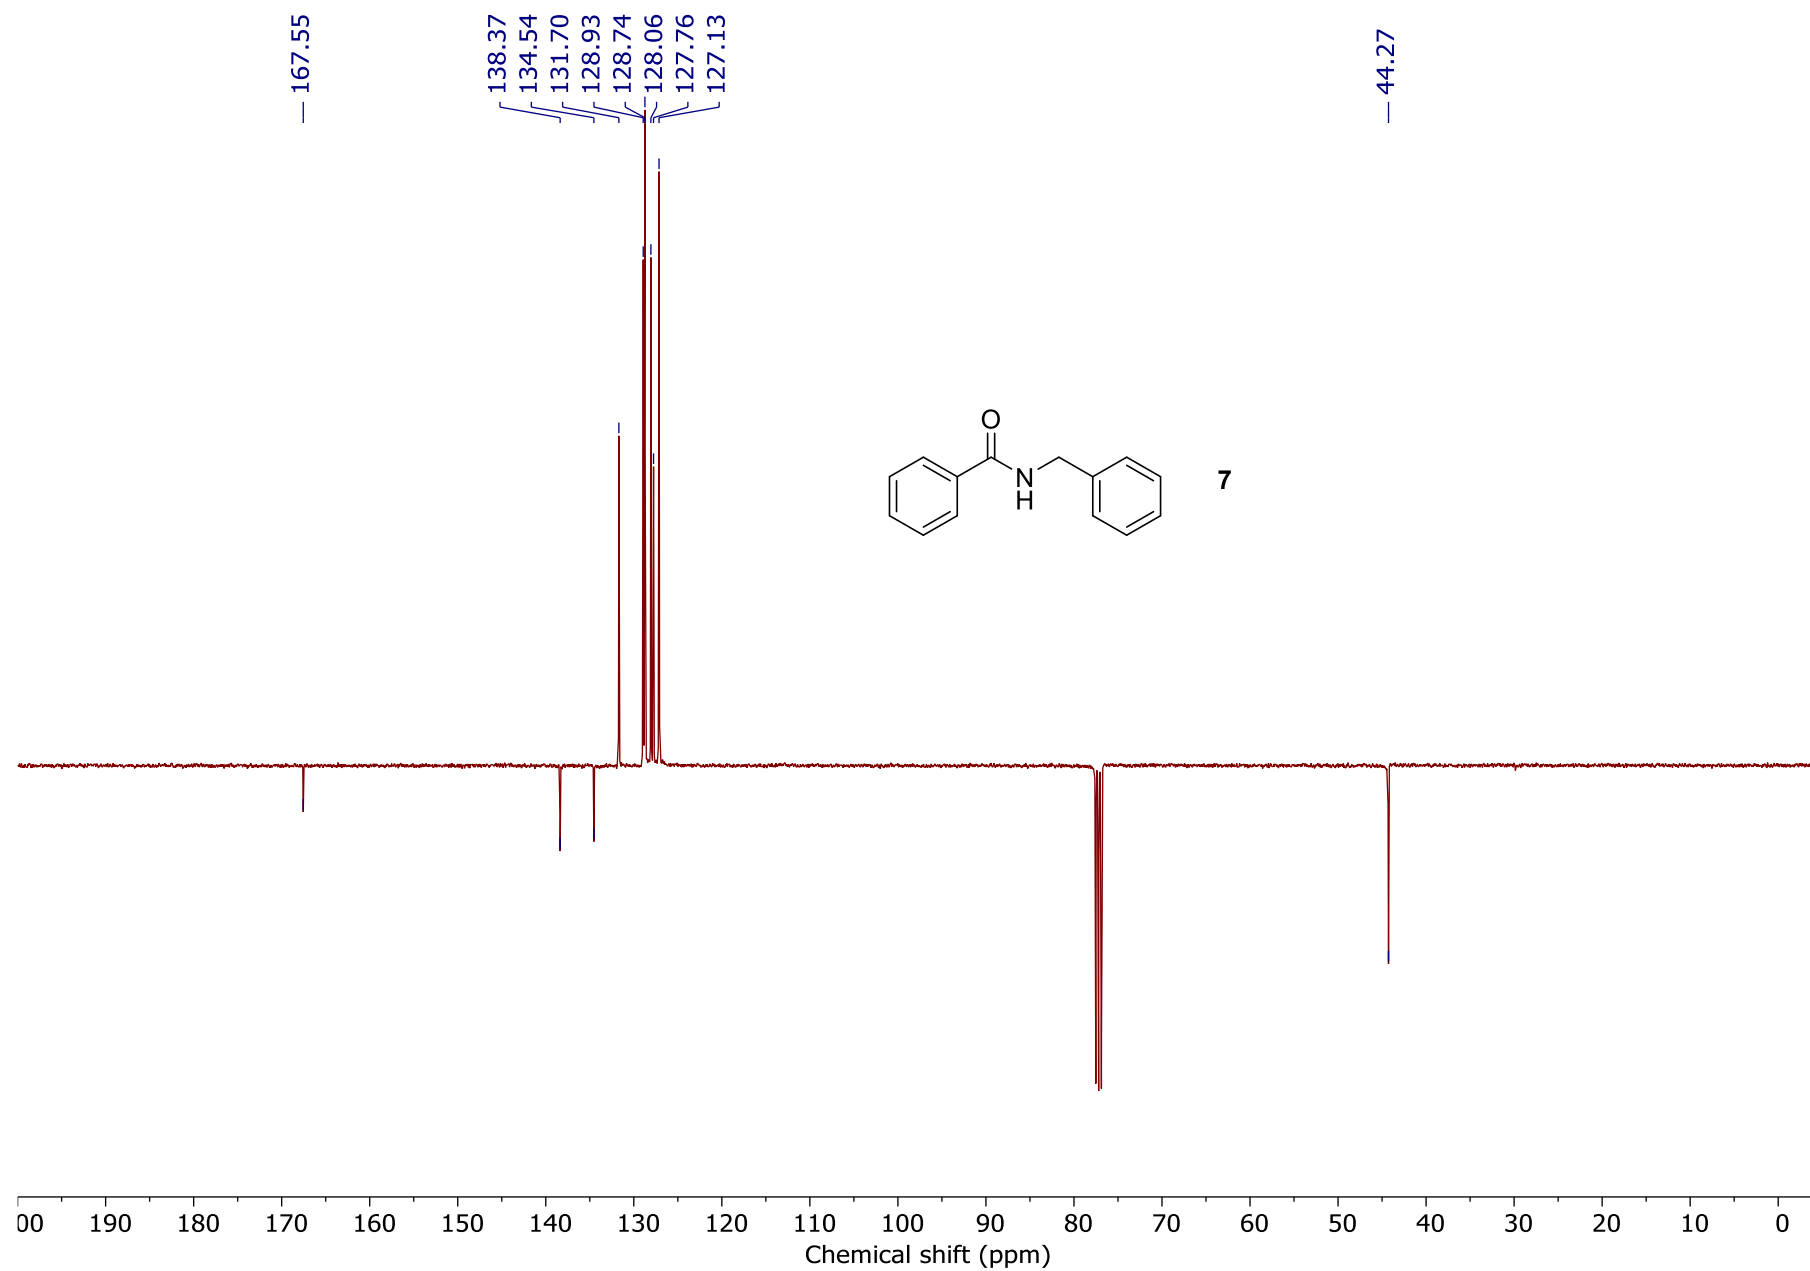

**Figure S1b.** DEPTQ NMR spectrum of compound 7 (100 MHz, CDCl<sub>3</sub>).

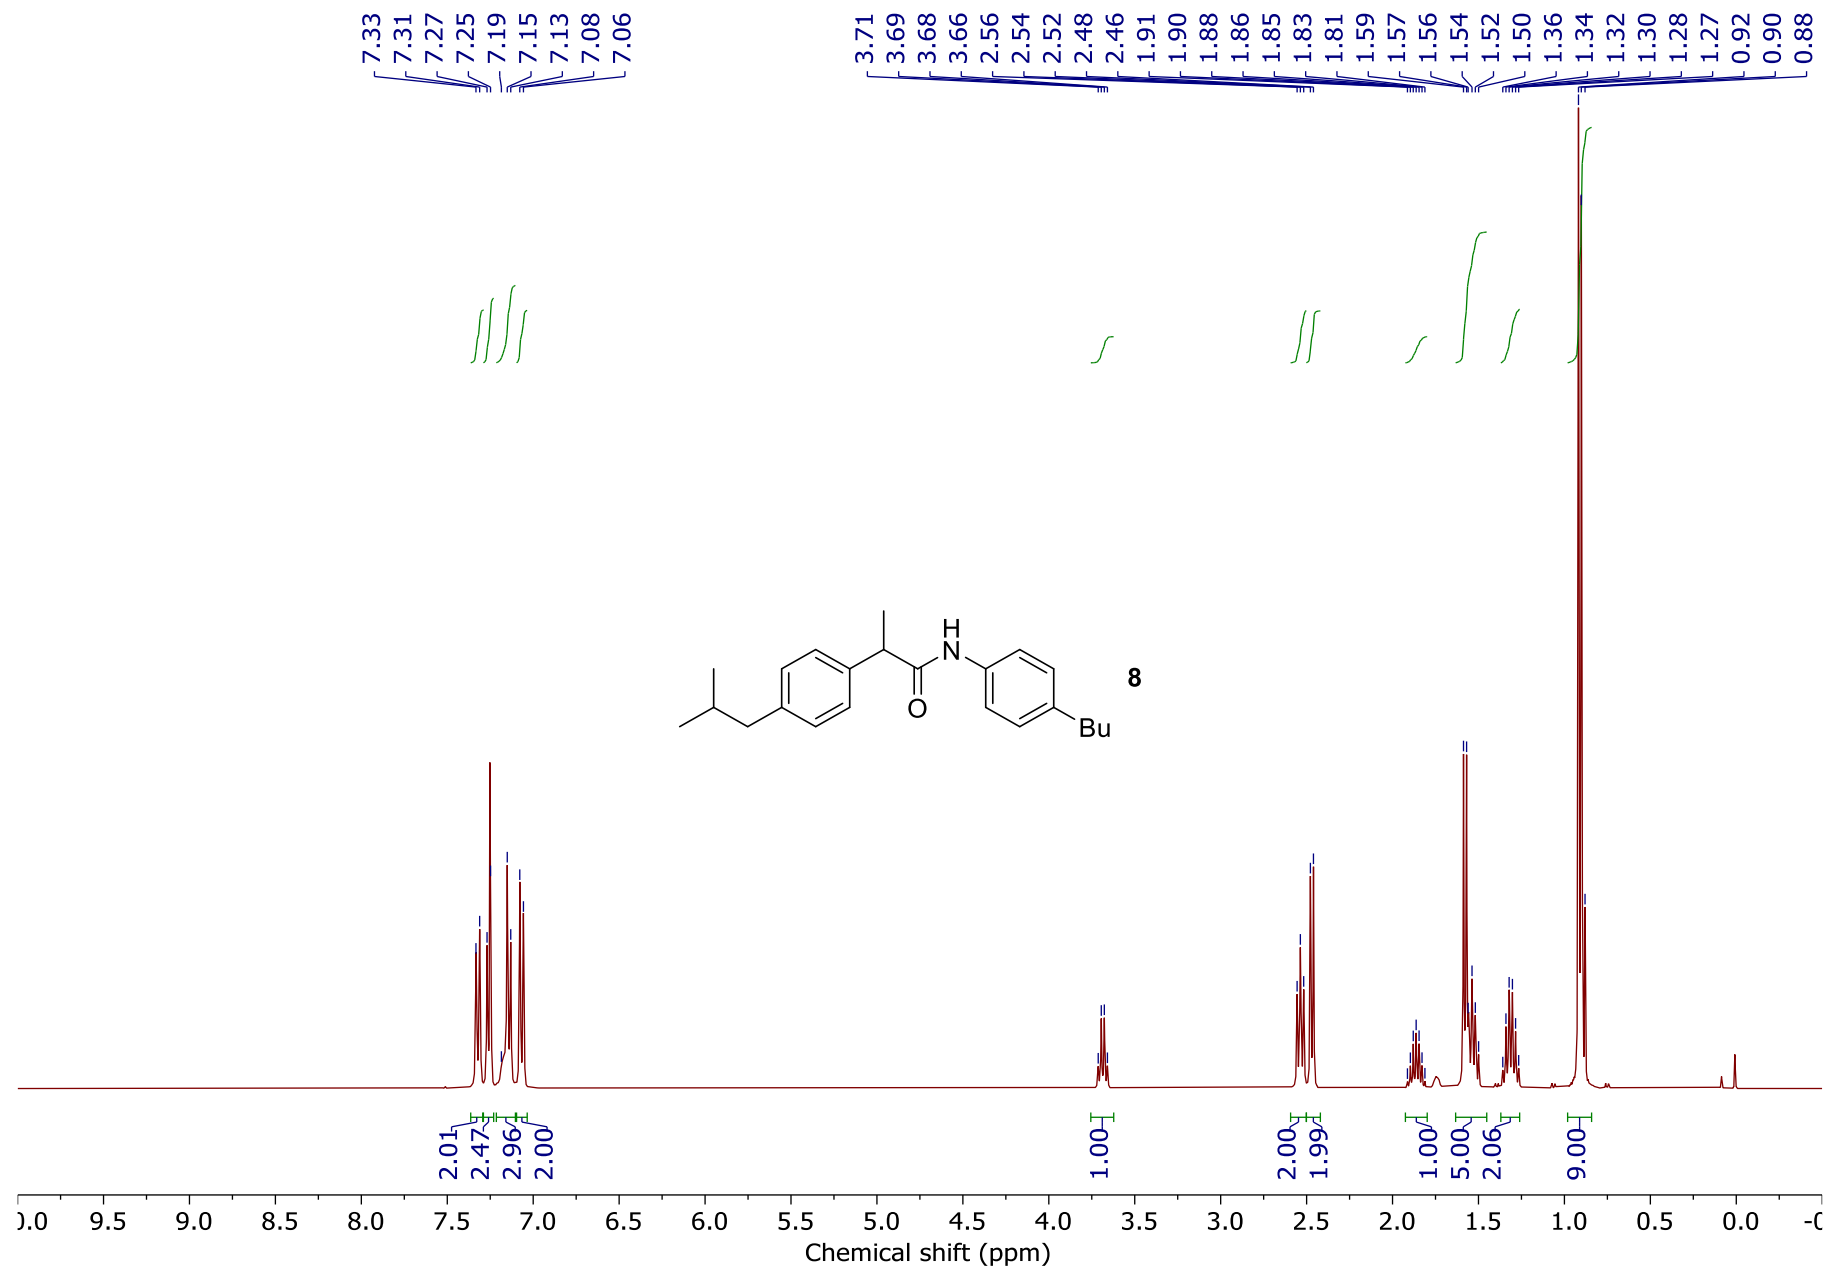

**Figure S2a.**  $^1\text{H}$  NMR spectrum of compound **8** (400 MHz,  $\text{CDCl}_3$ ).

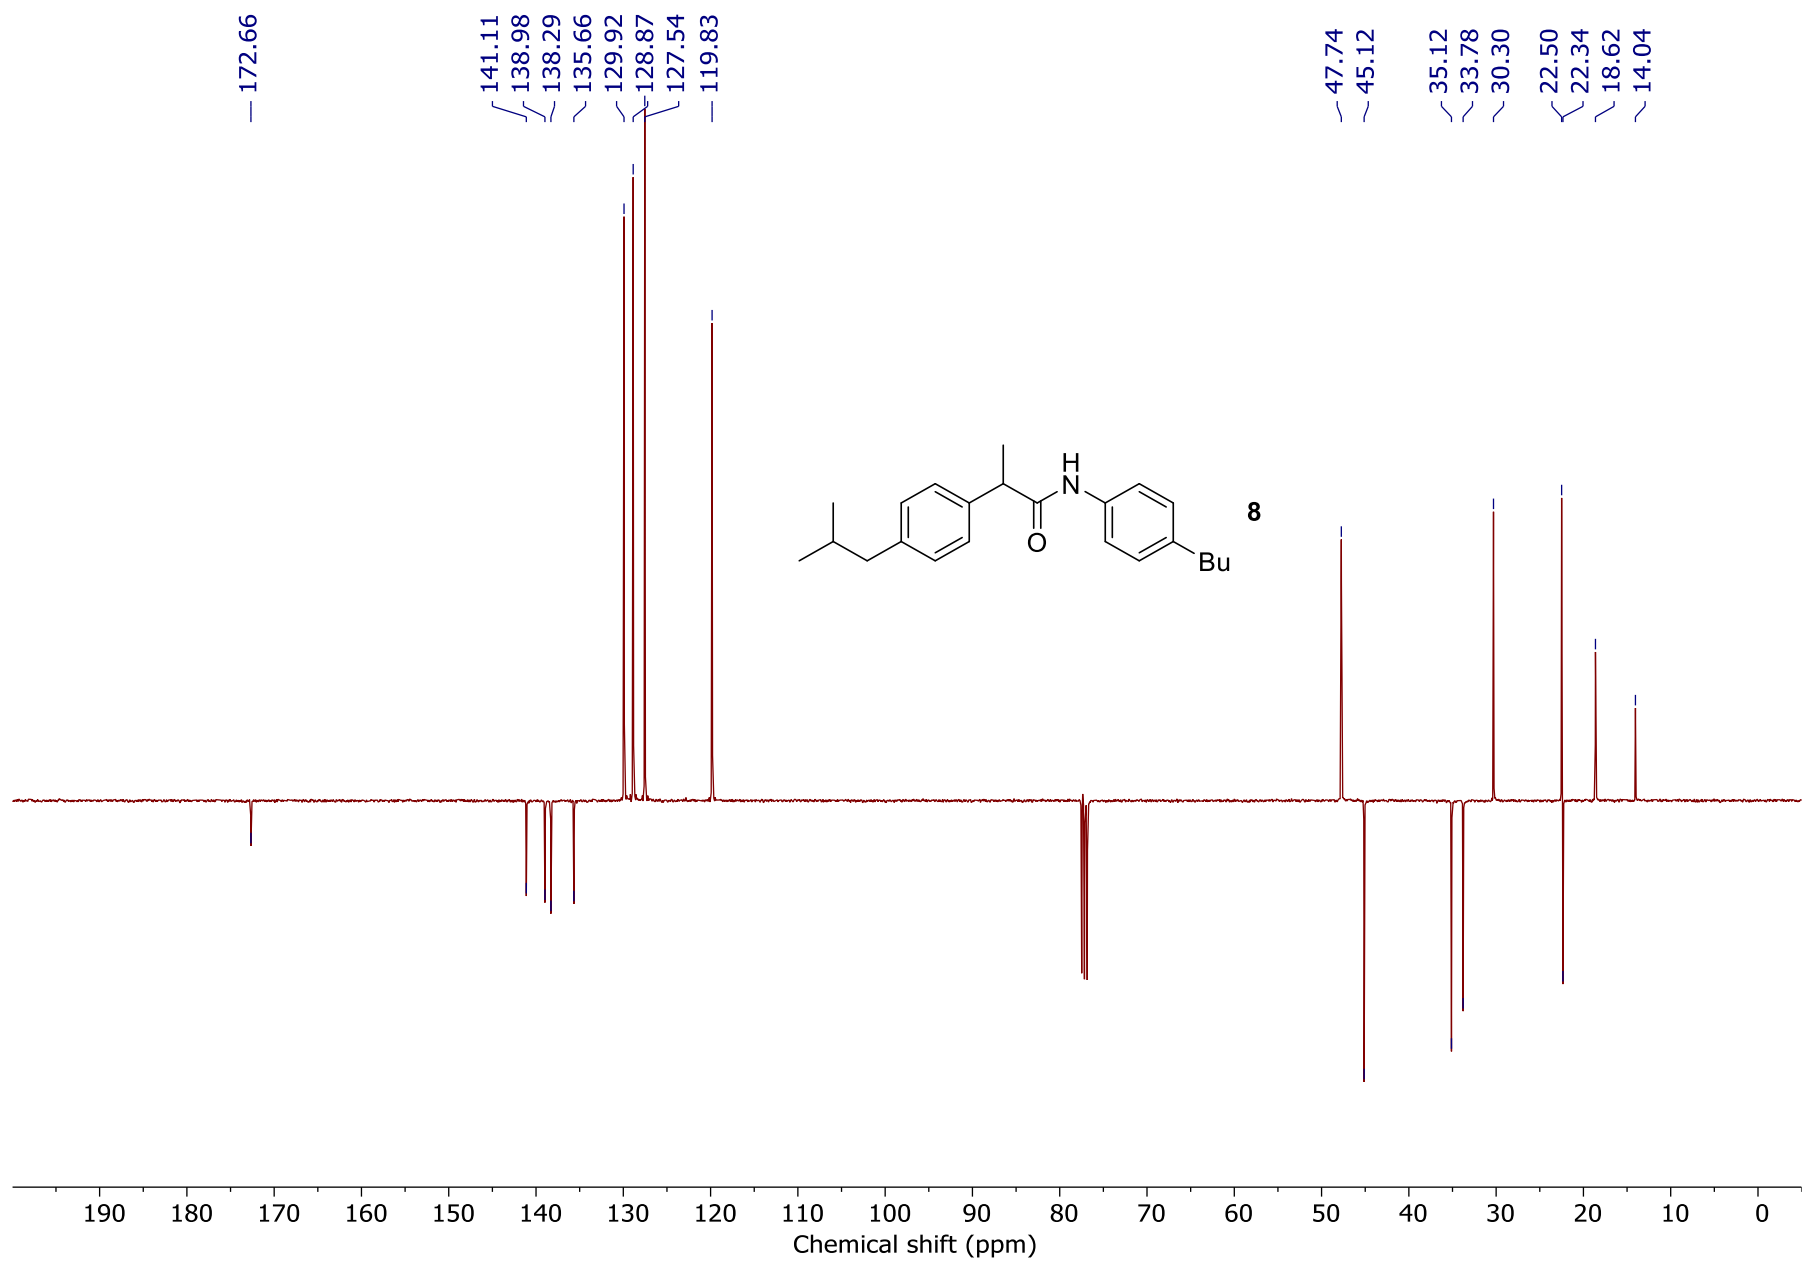

**Figure S2b.** DEPTQ NMR spectrum of compound **8** (100 MHz,  $\text{CDCl}_3$ ).

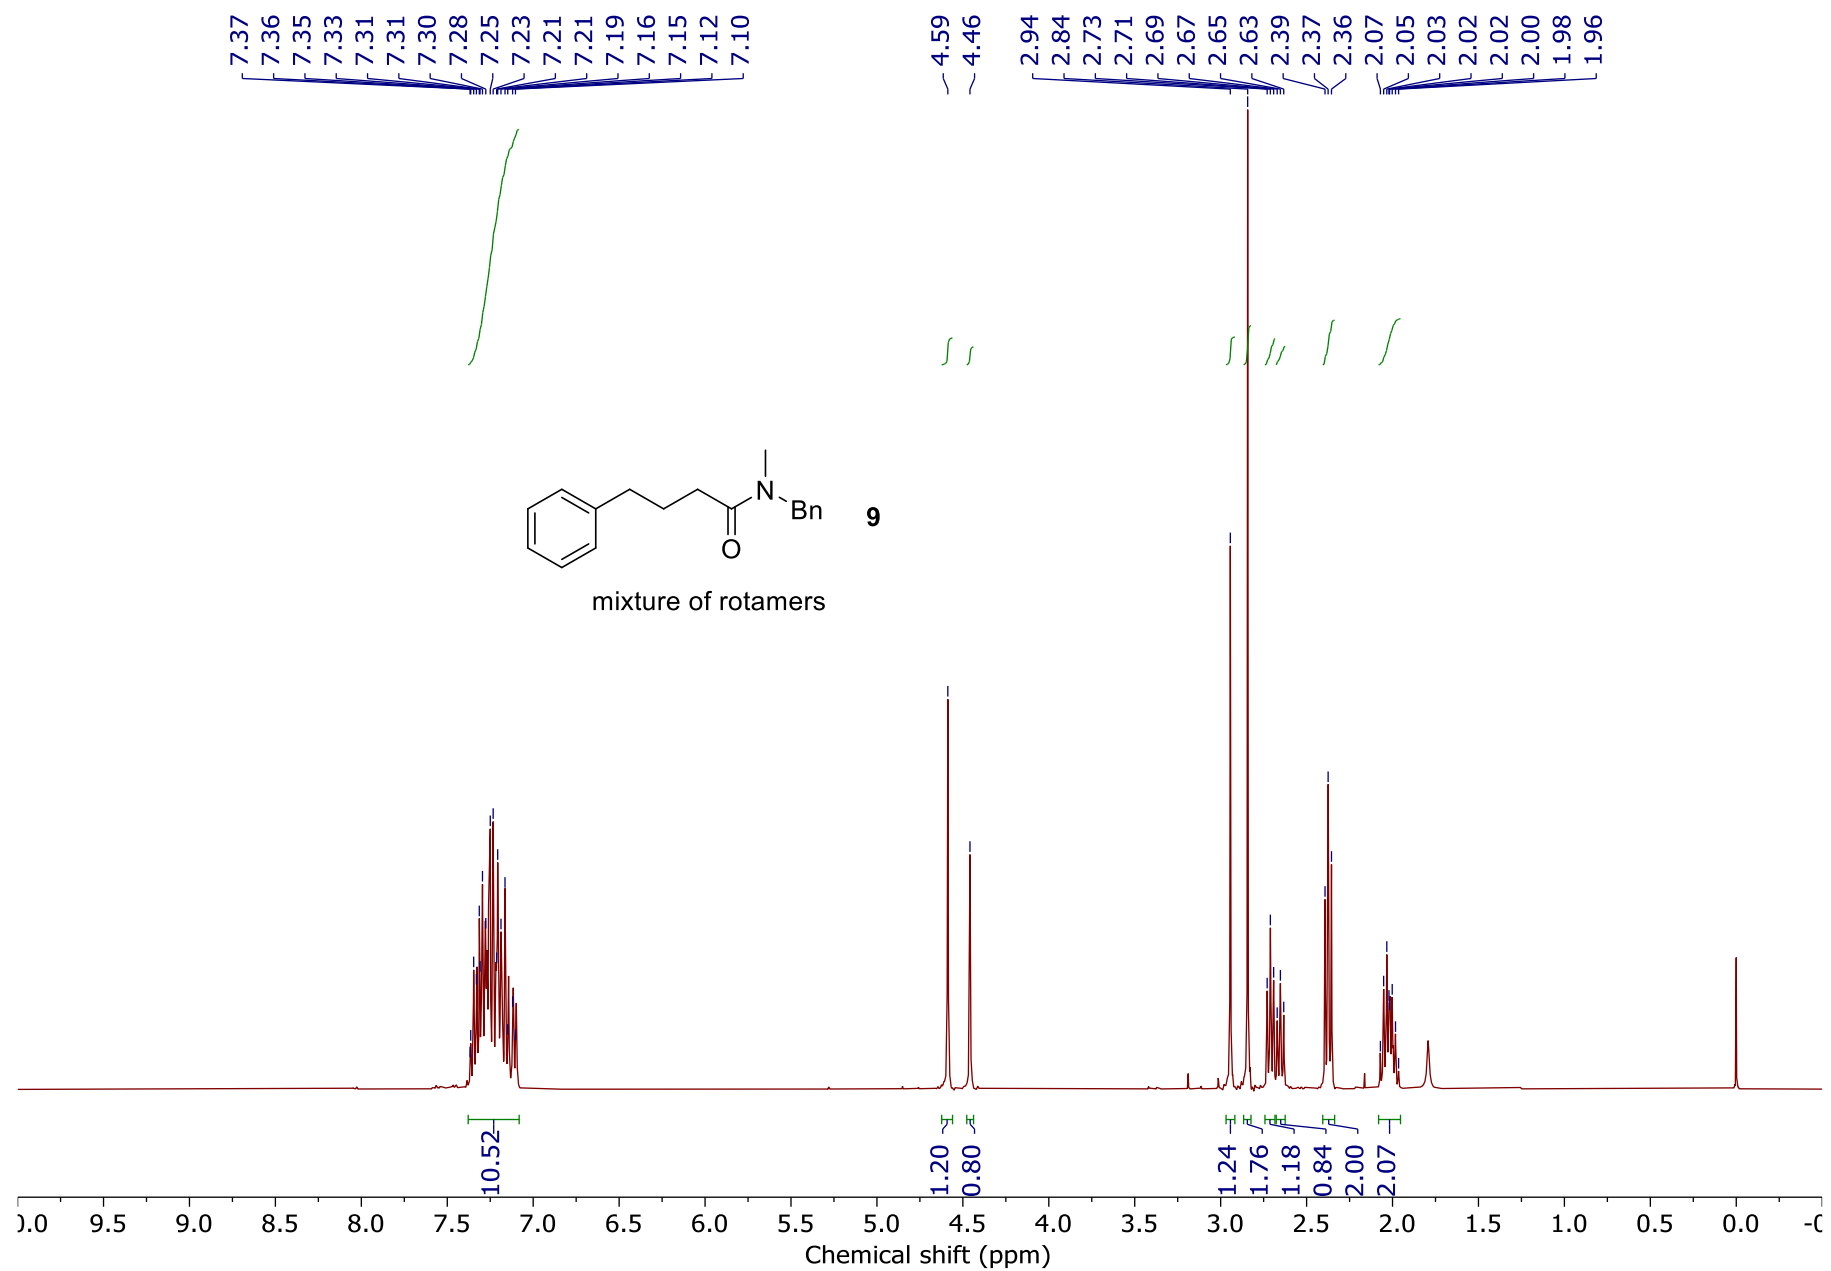

**Figure S3a.**  $^1\text{H}$  NMR spectrum of compound **9** (400 MHz,  $\text{CDCl}_3$ ).

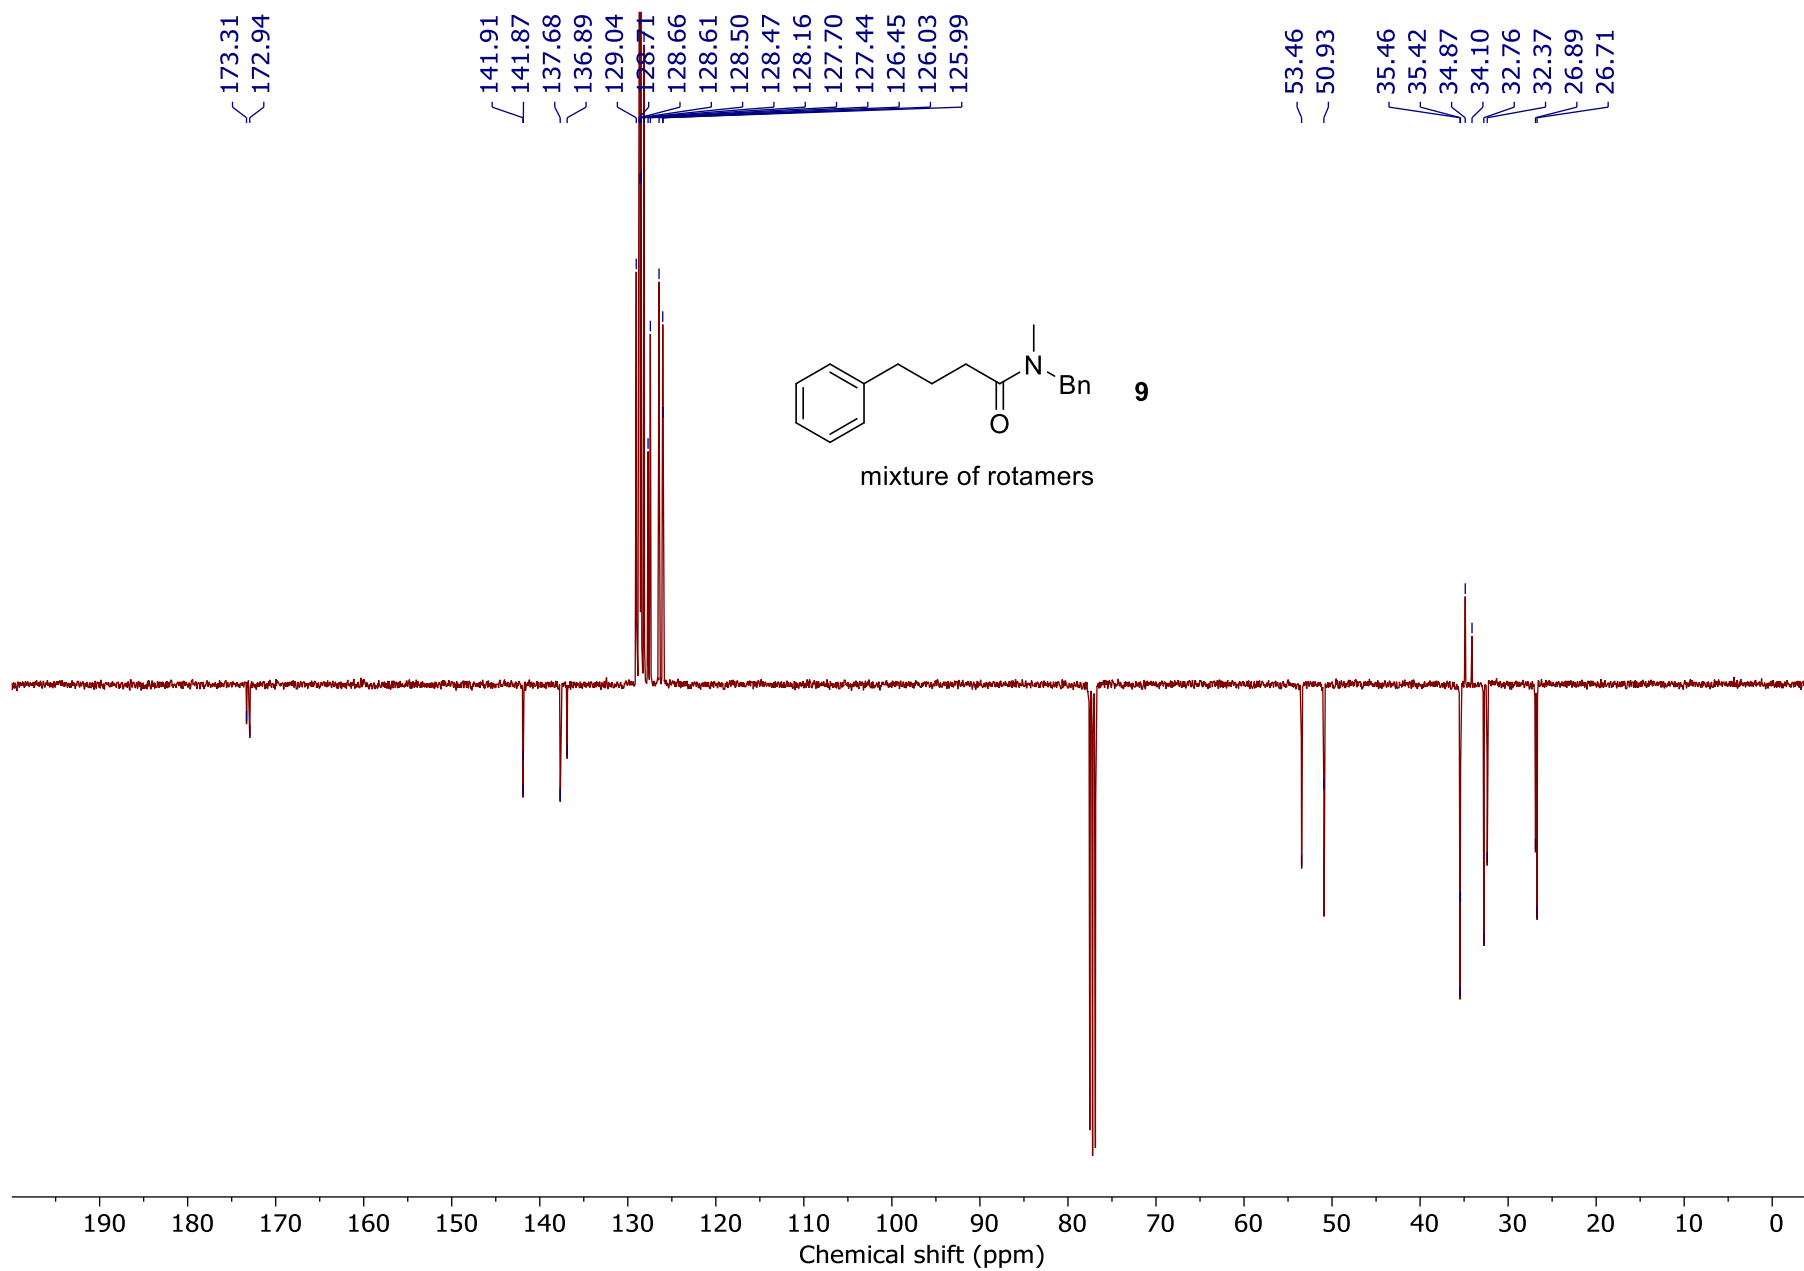

**Figure S3b.** DEPTQ NMR spectrum of compound **9** (100 MHz,  $\text{CDCl}_3$ ).

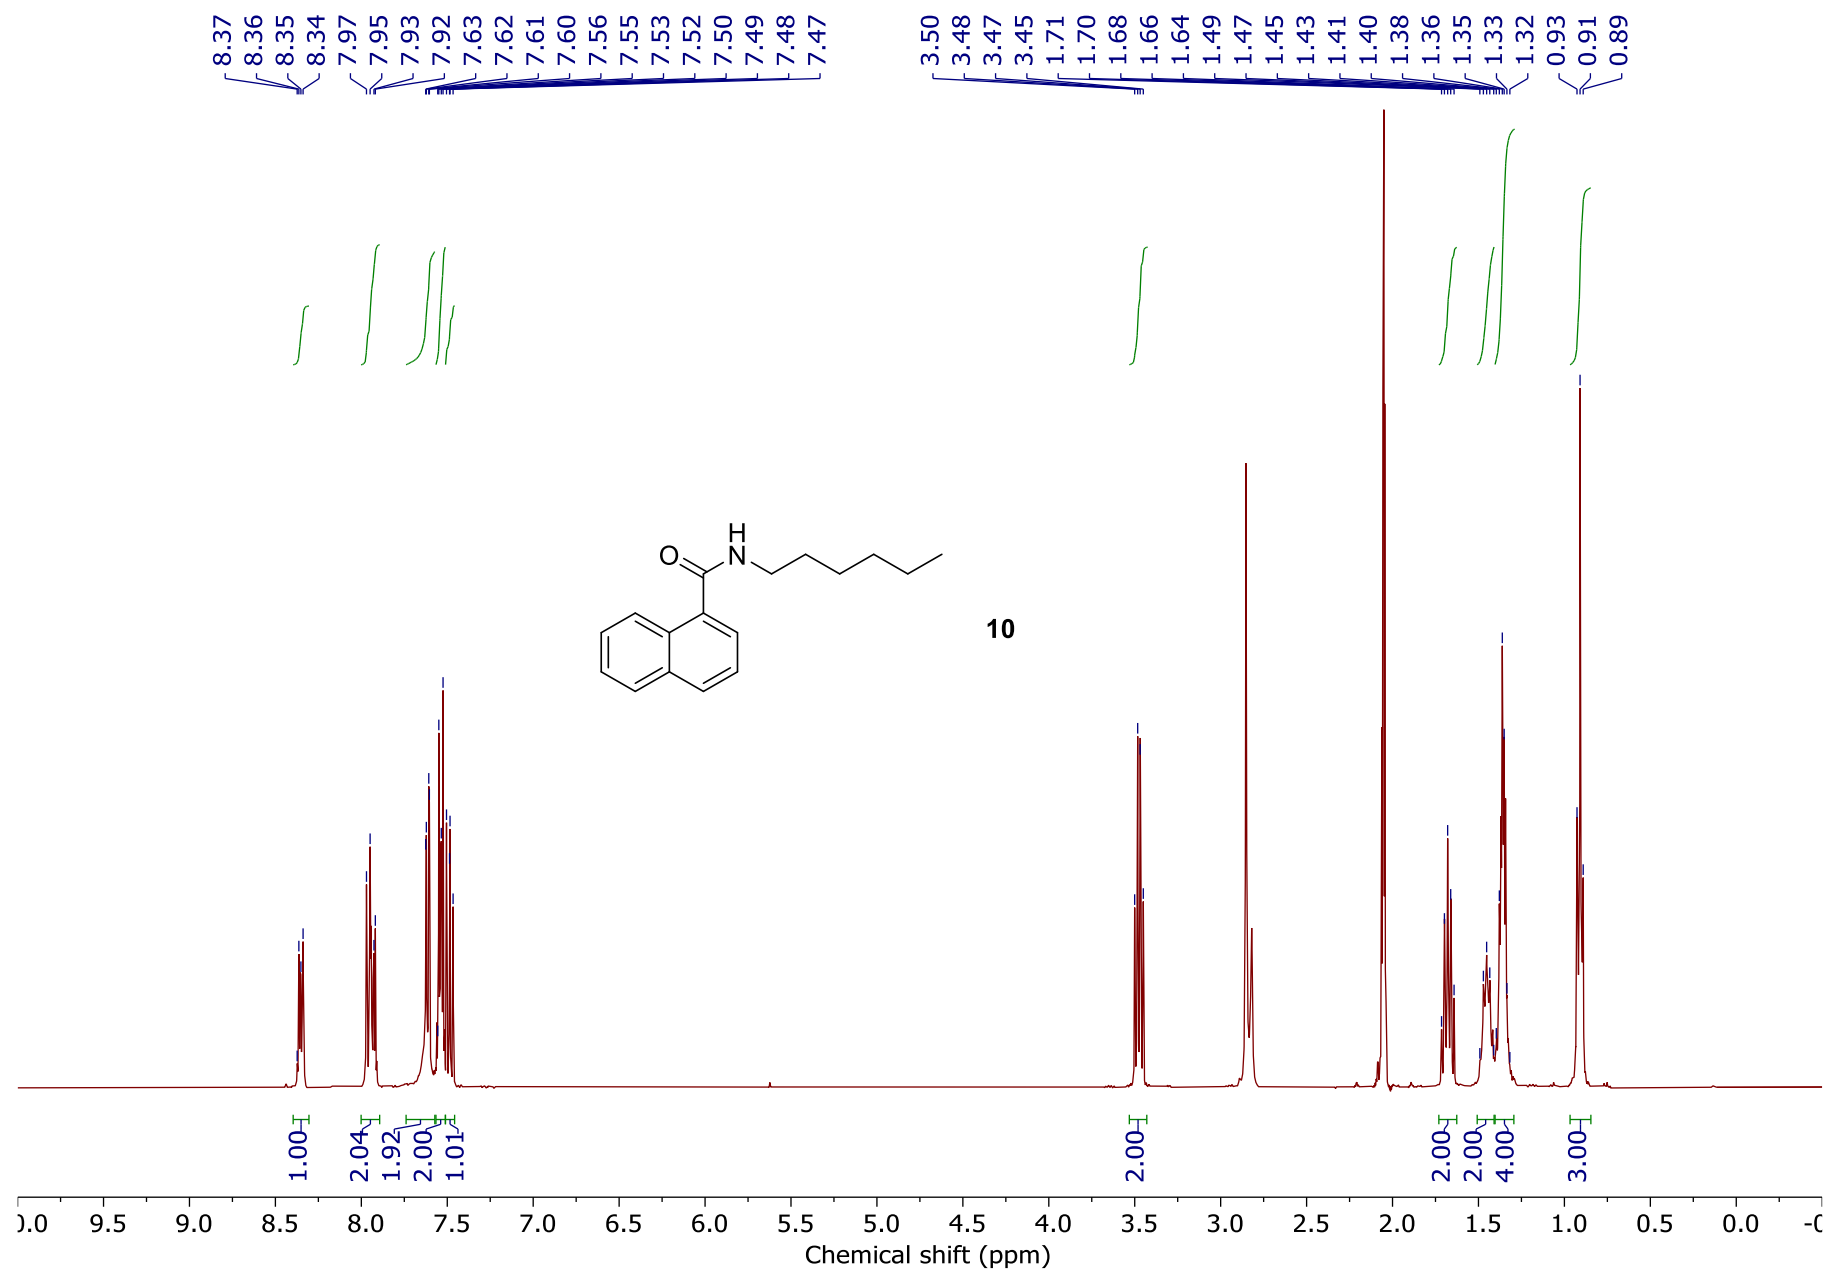

**Figure S4a.** <sup>1</sup>H NMR spectrum of compound **10** (400 MHz, acetone-*d*<sub>6</sub>).

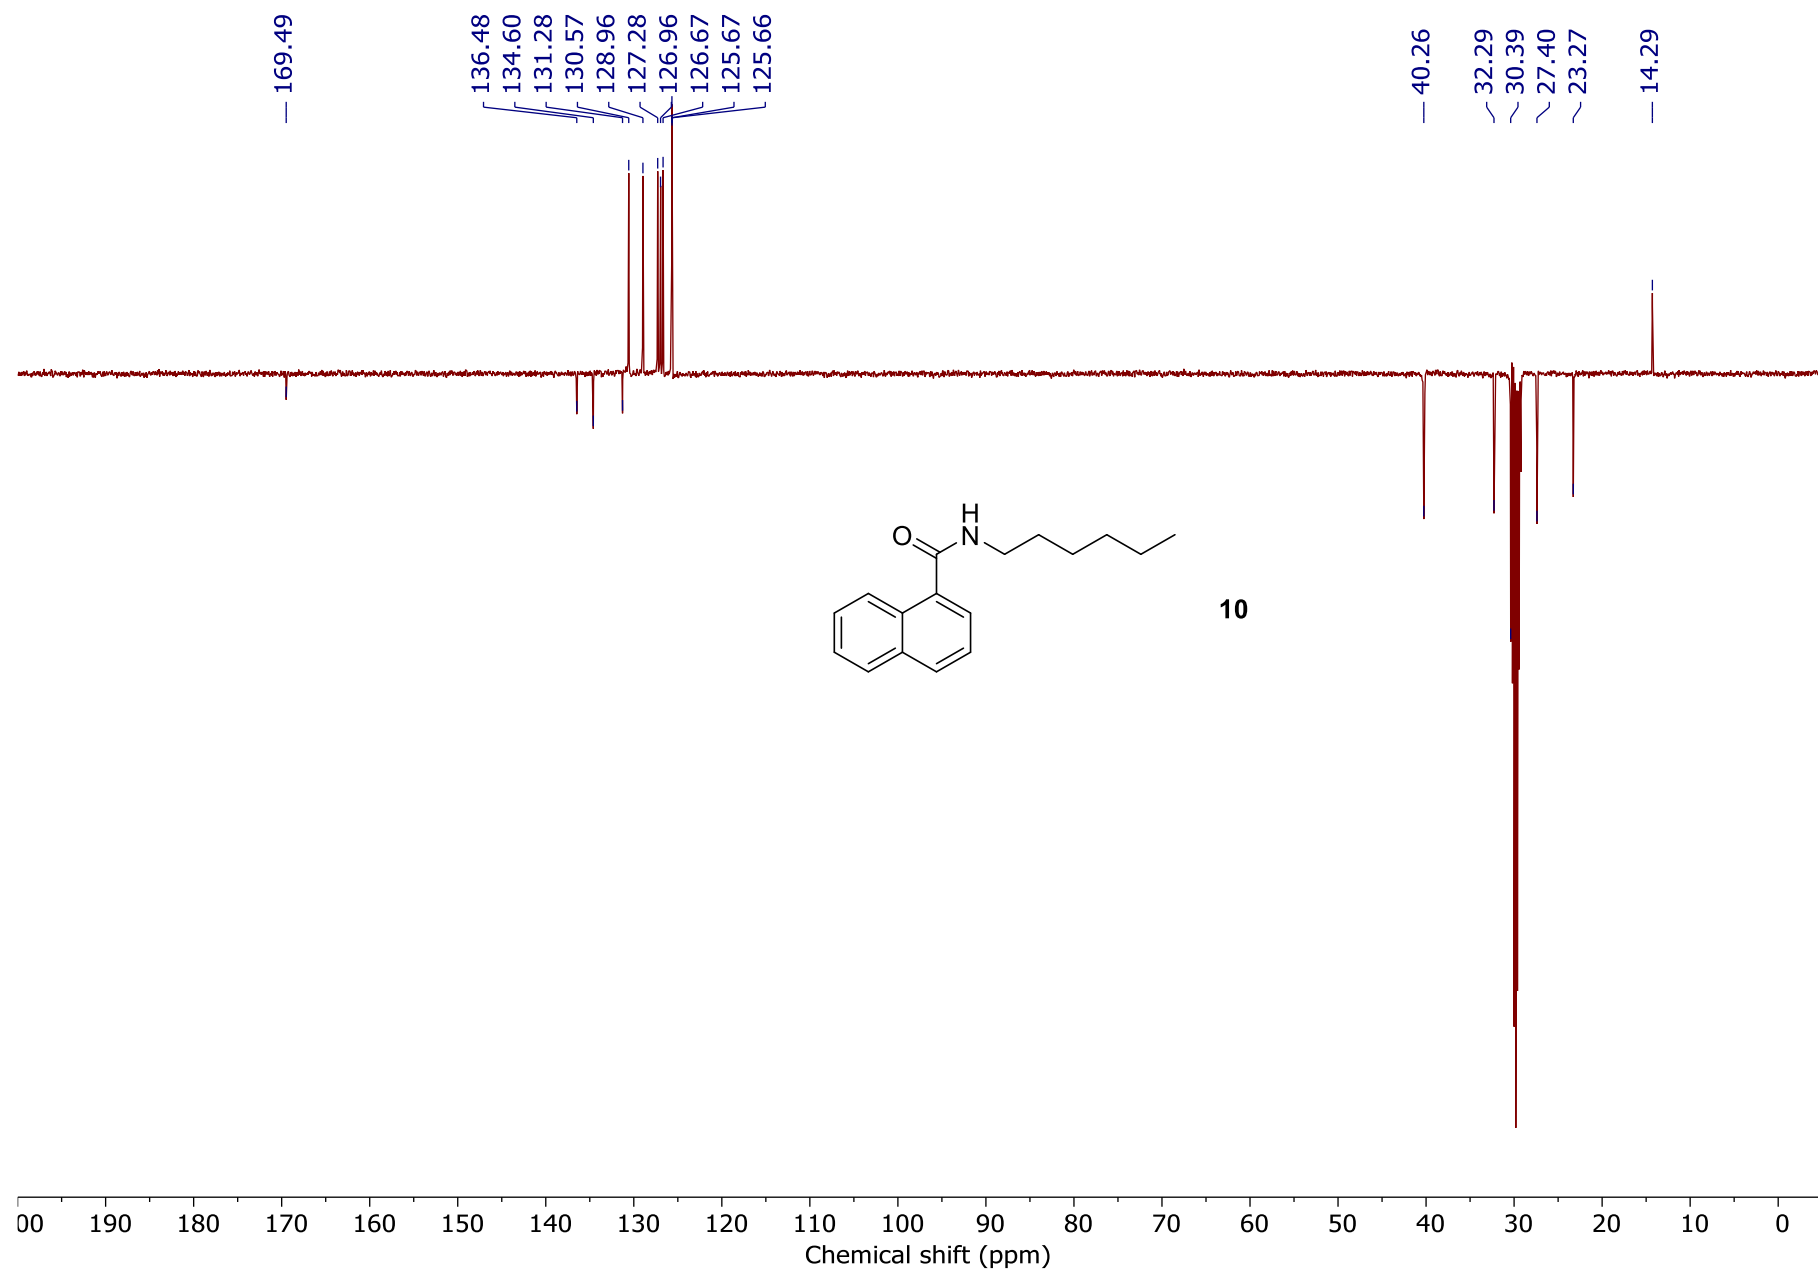

**Figure S4b.** DEPTQ NMR spectrum of compound **10** (100 MHz, acetone- $d_6$ ).

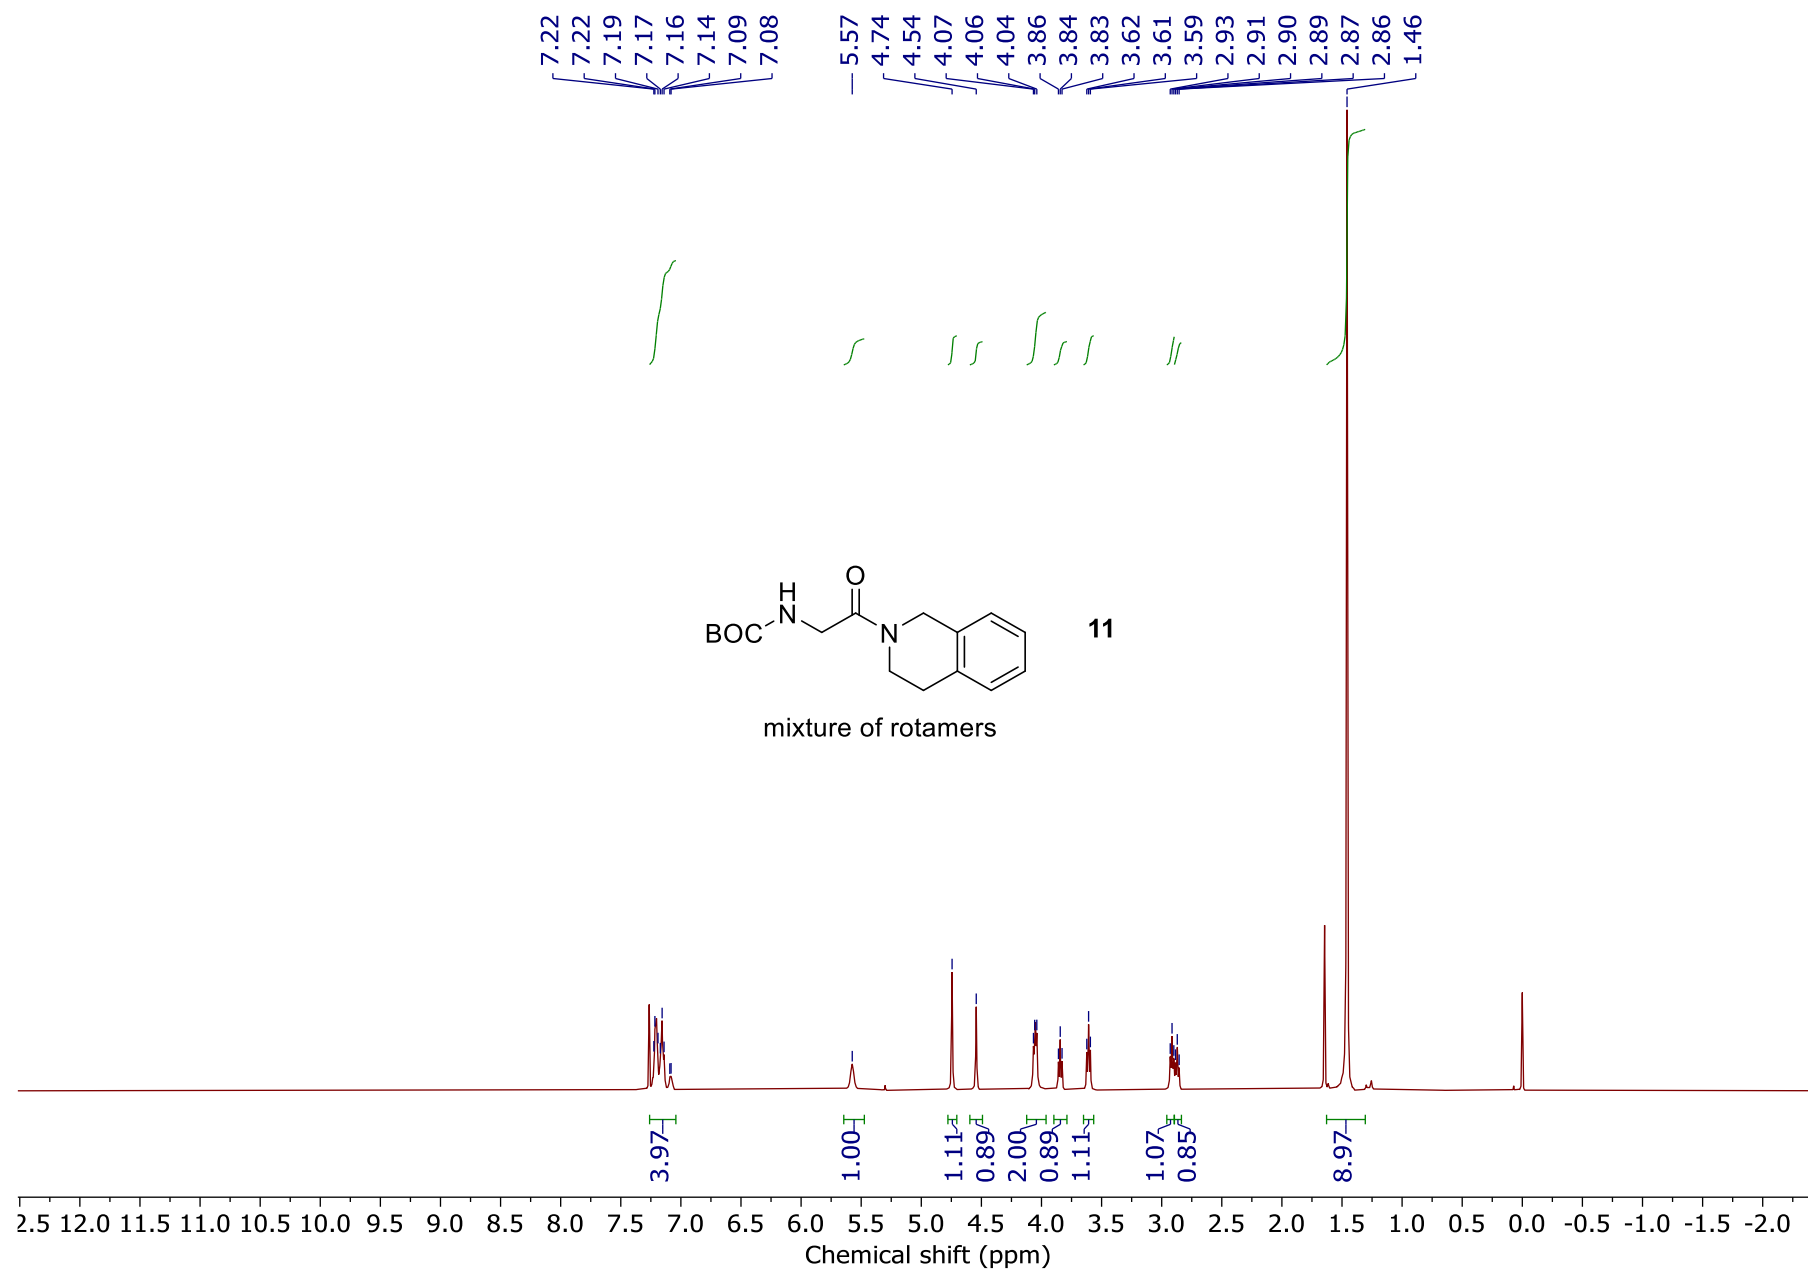

**Figure S5a.**  $^1\text{H}$  NMR spectrum of compound **11** (400 MHz,  $\text{CDCl}_3$ ).

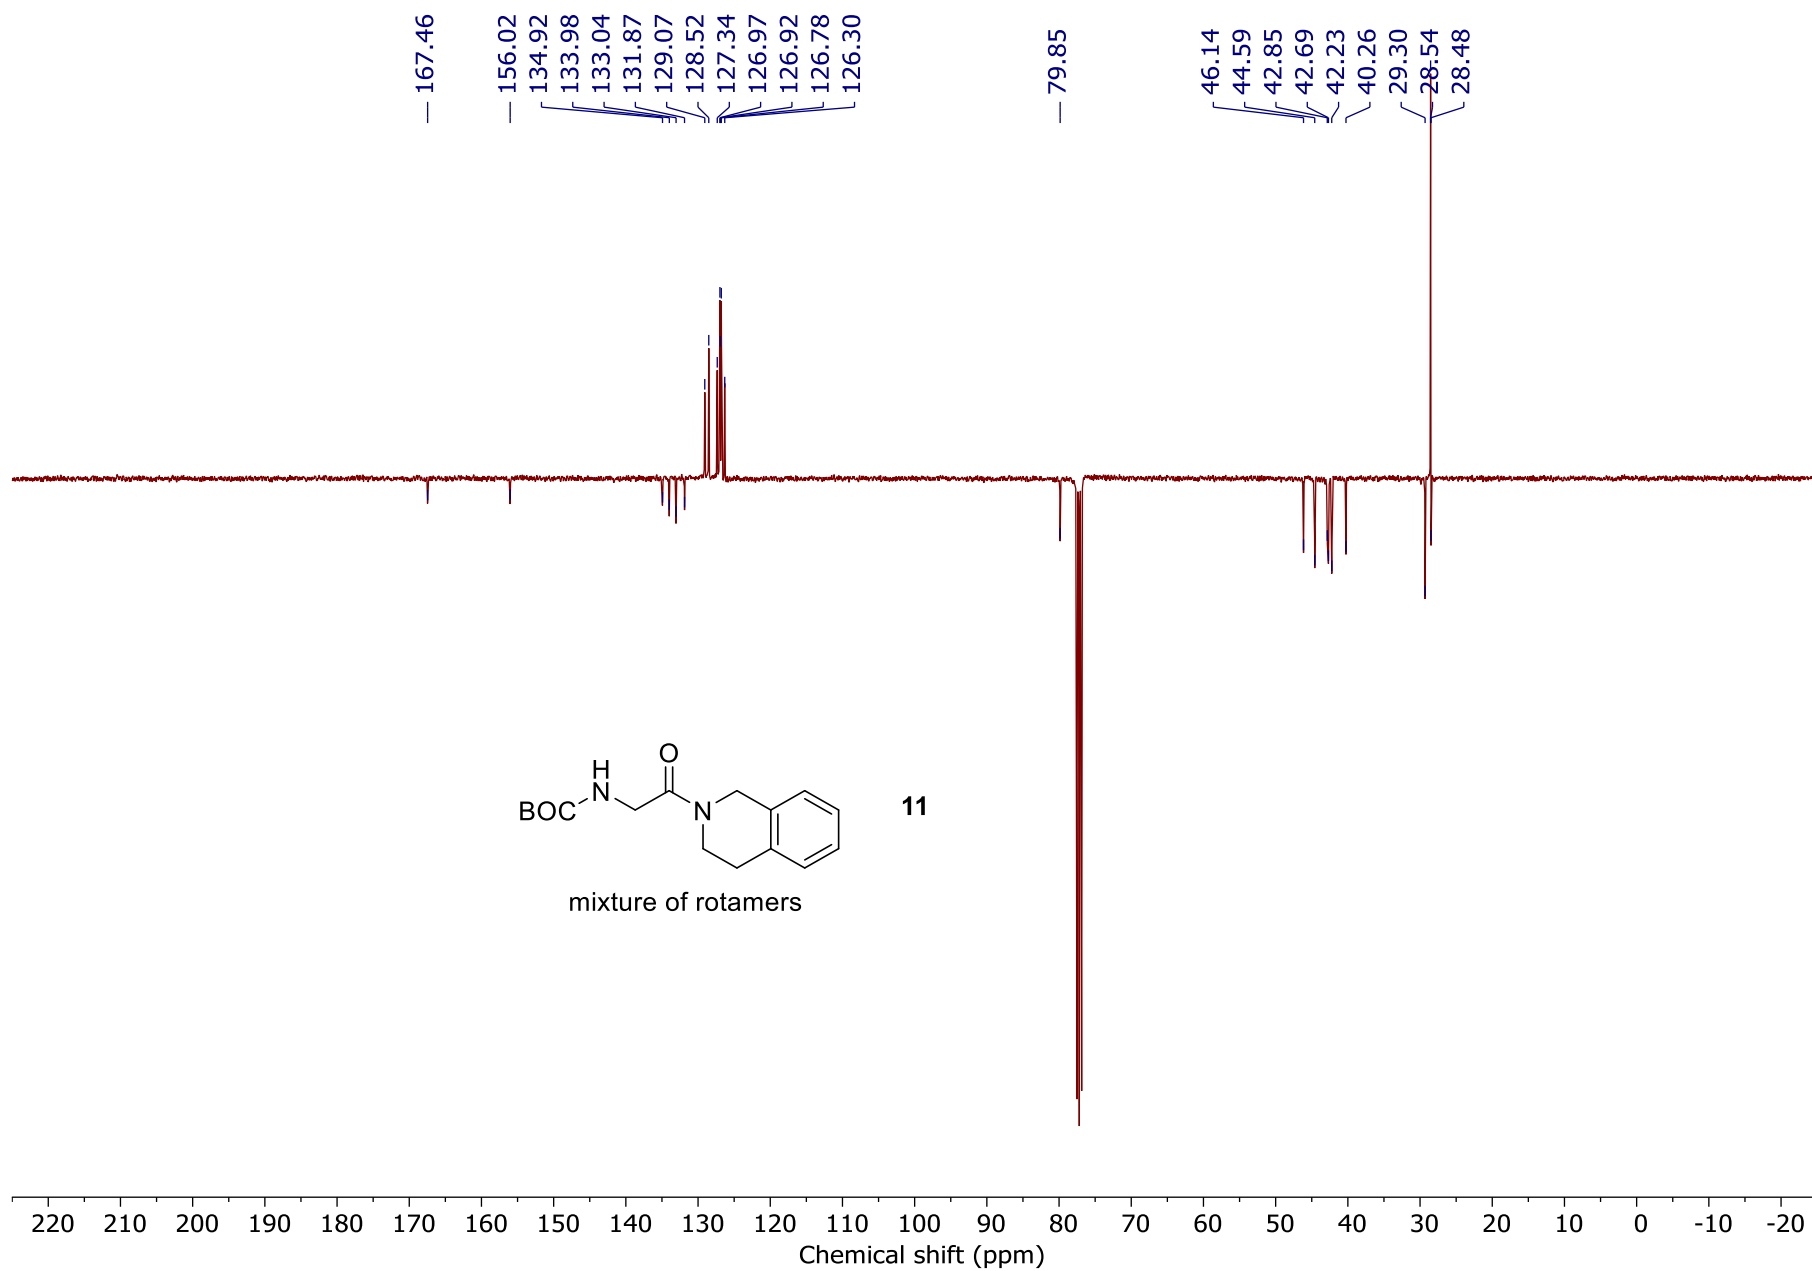

**Figure S5b.** DEPTQ NMR spectrum of compound **11** (100 MHz, CDCl<sub>3</sub>).

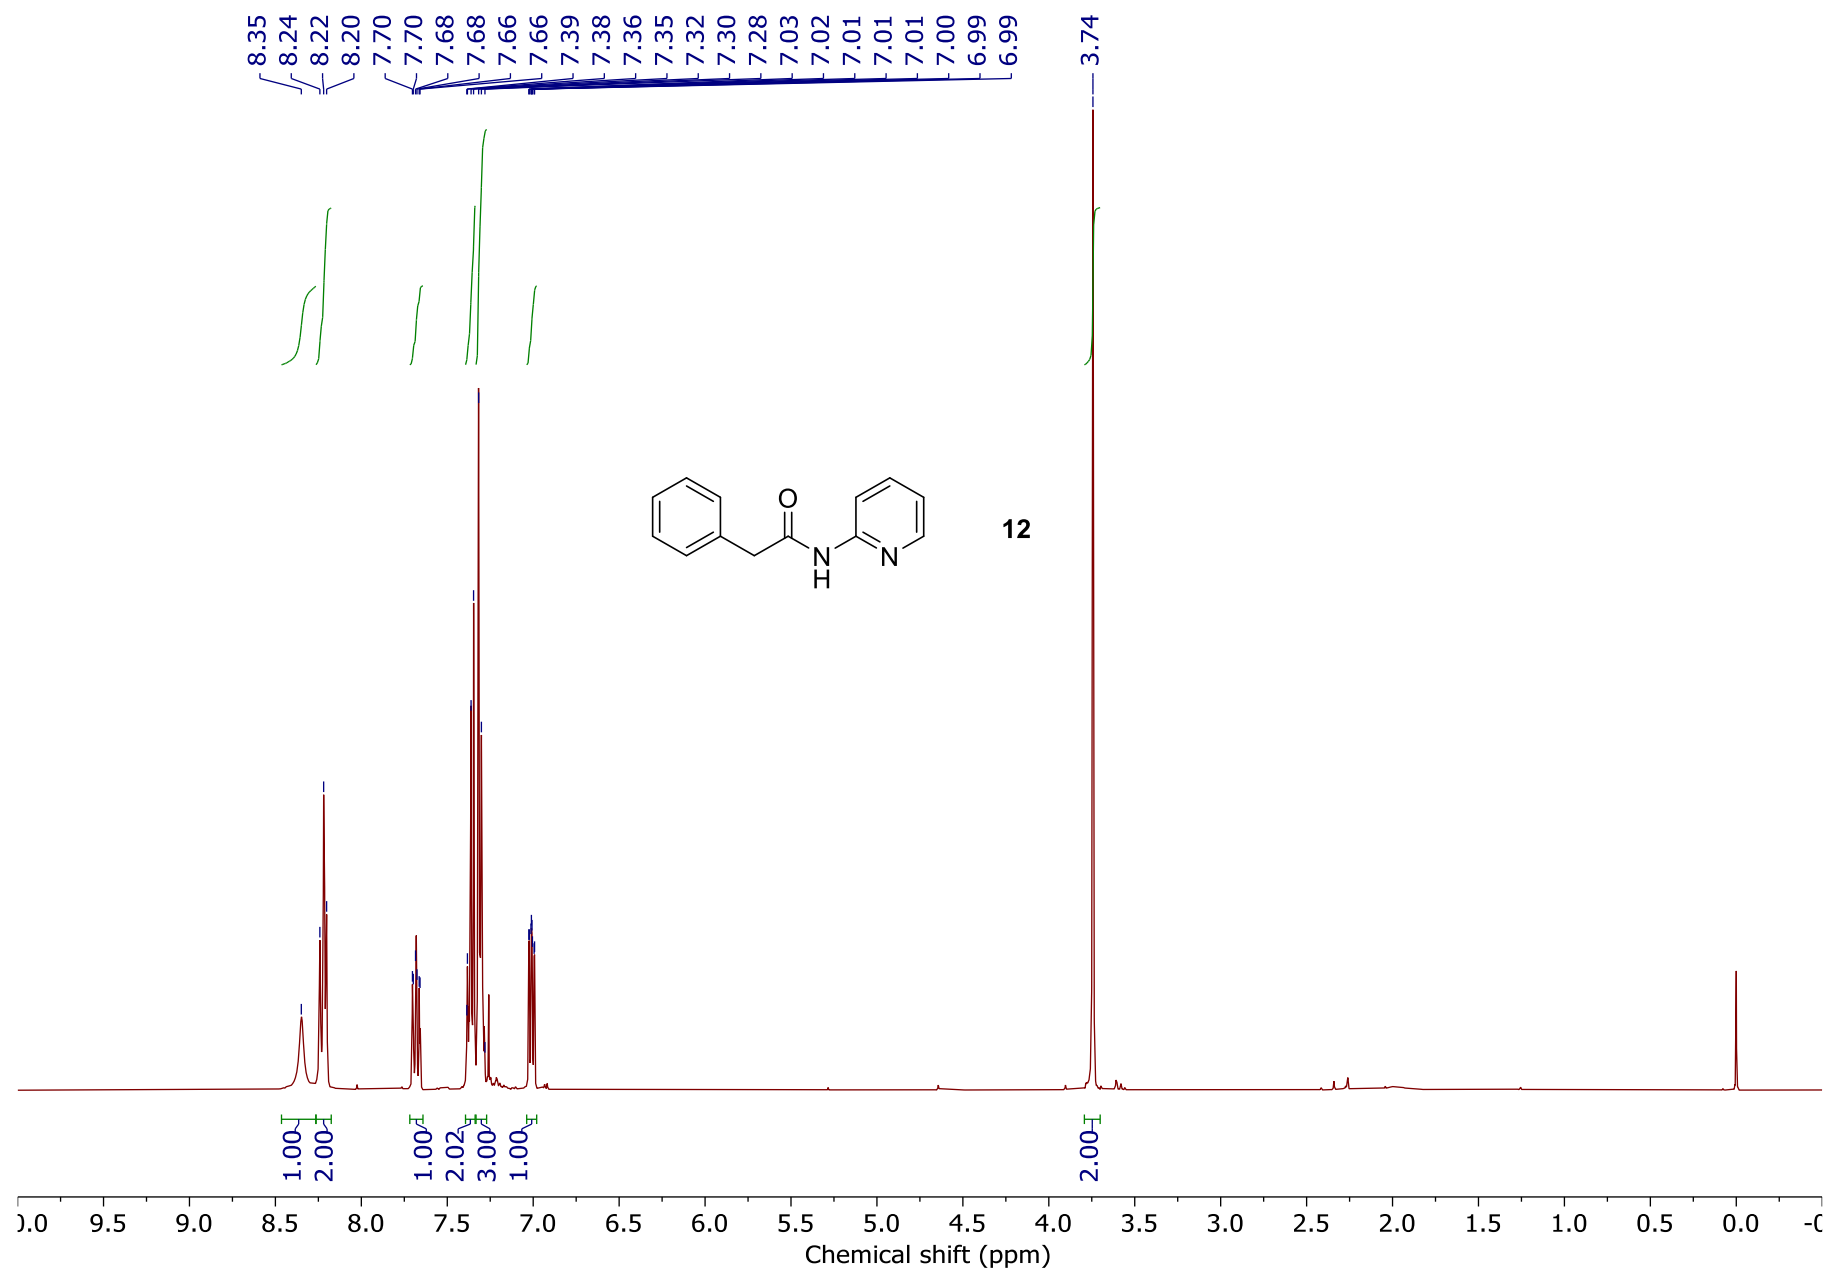

**Figure S6a.**  $^1\text{H}$  NMR spectrum of compound **12** (400 MHz,  $\text{CDCl}_3$ ).

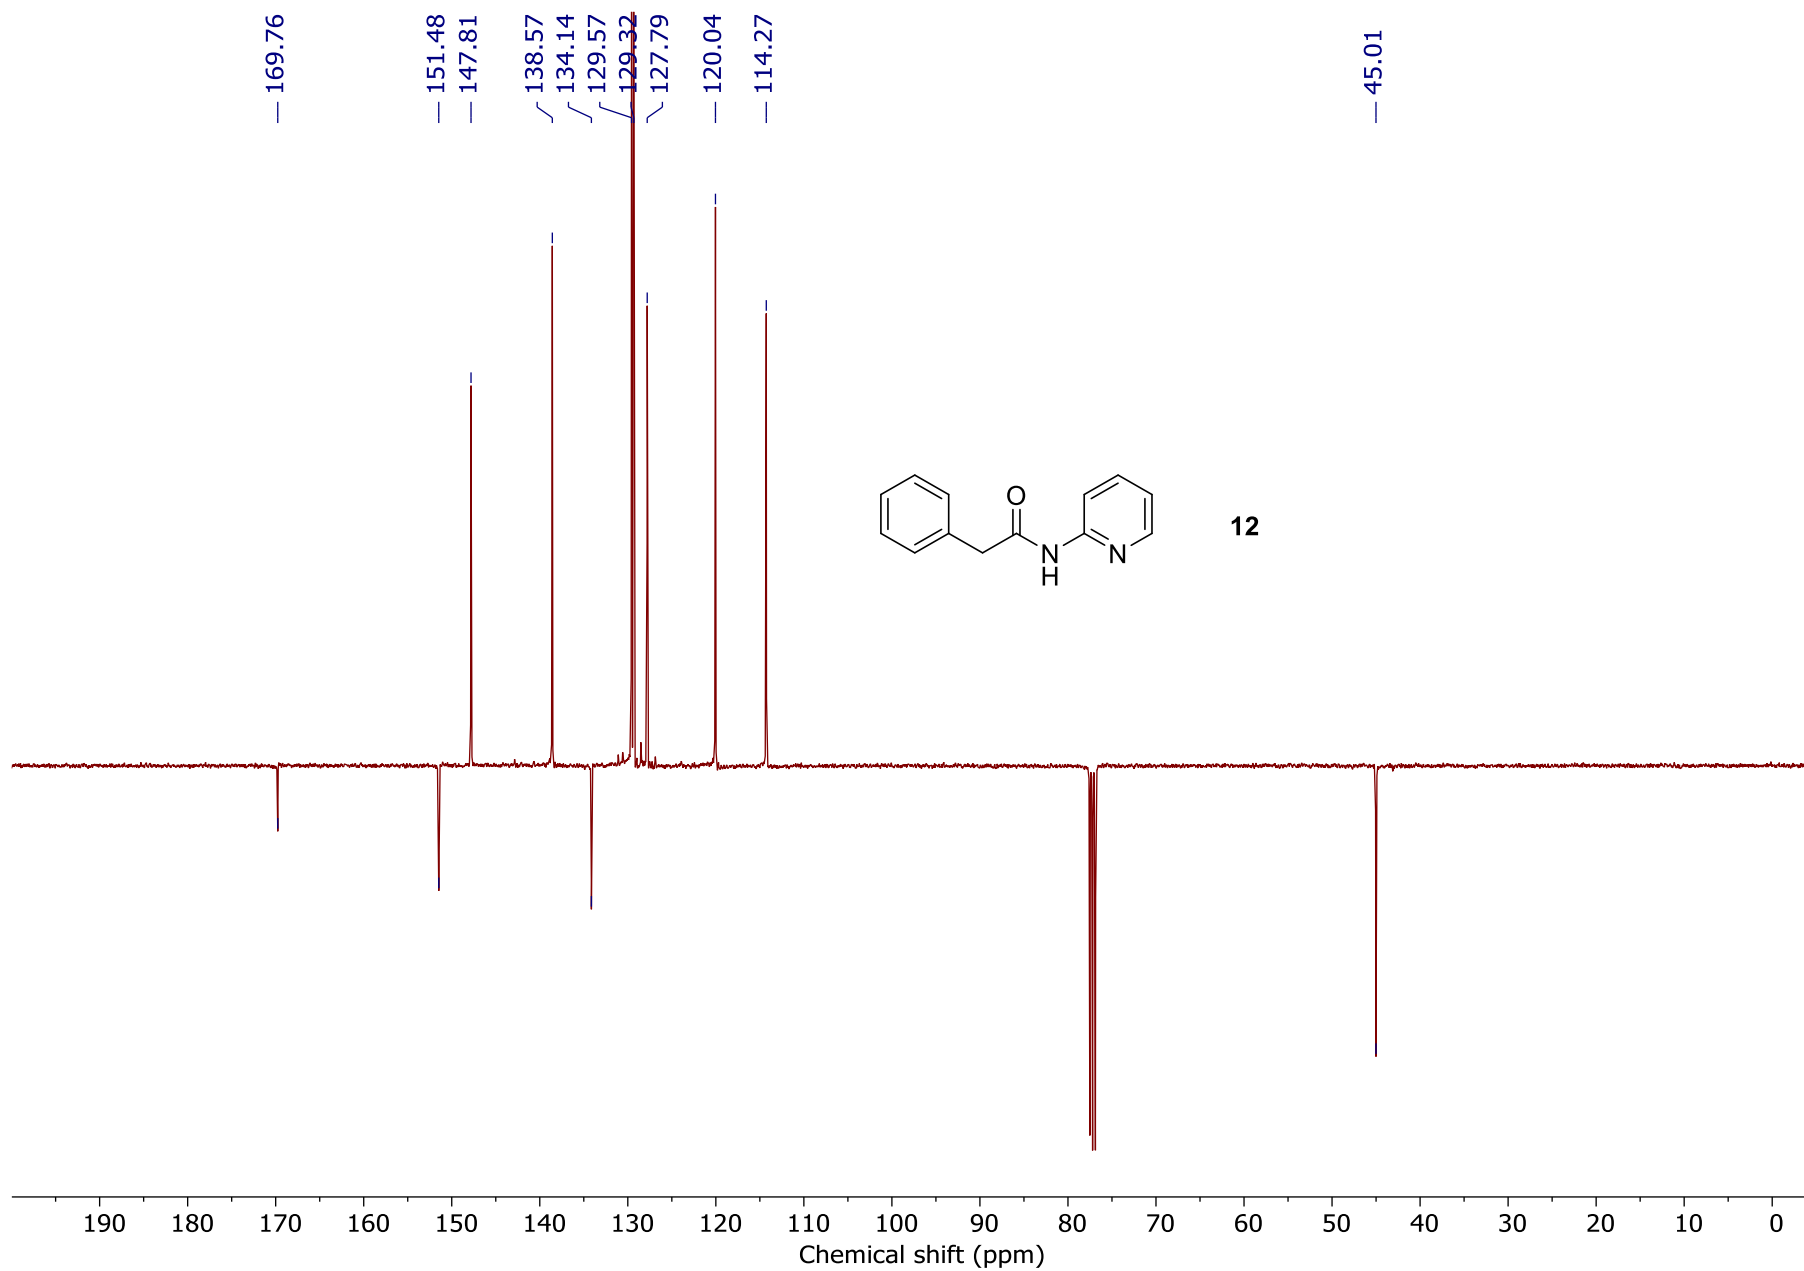

**Figure S6b.** DEPTQ NMR spectrum of compound **12** (100 MHz,  $\text{CDCl}_3$ ).

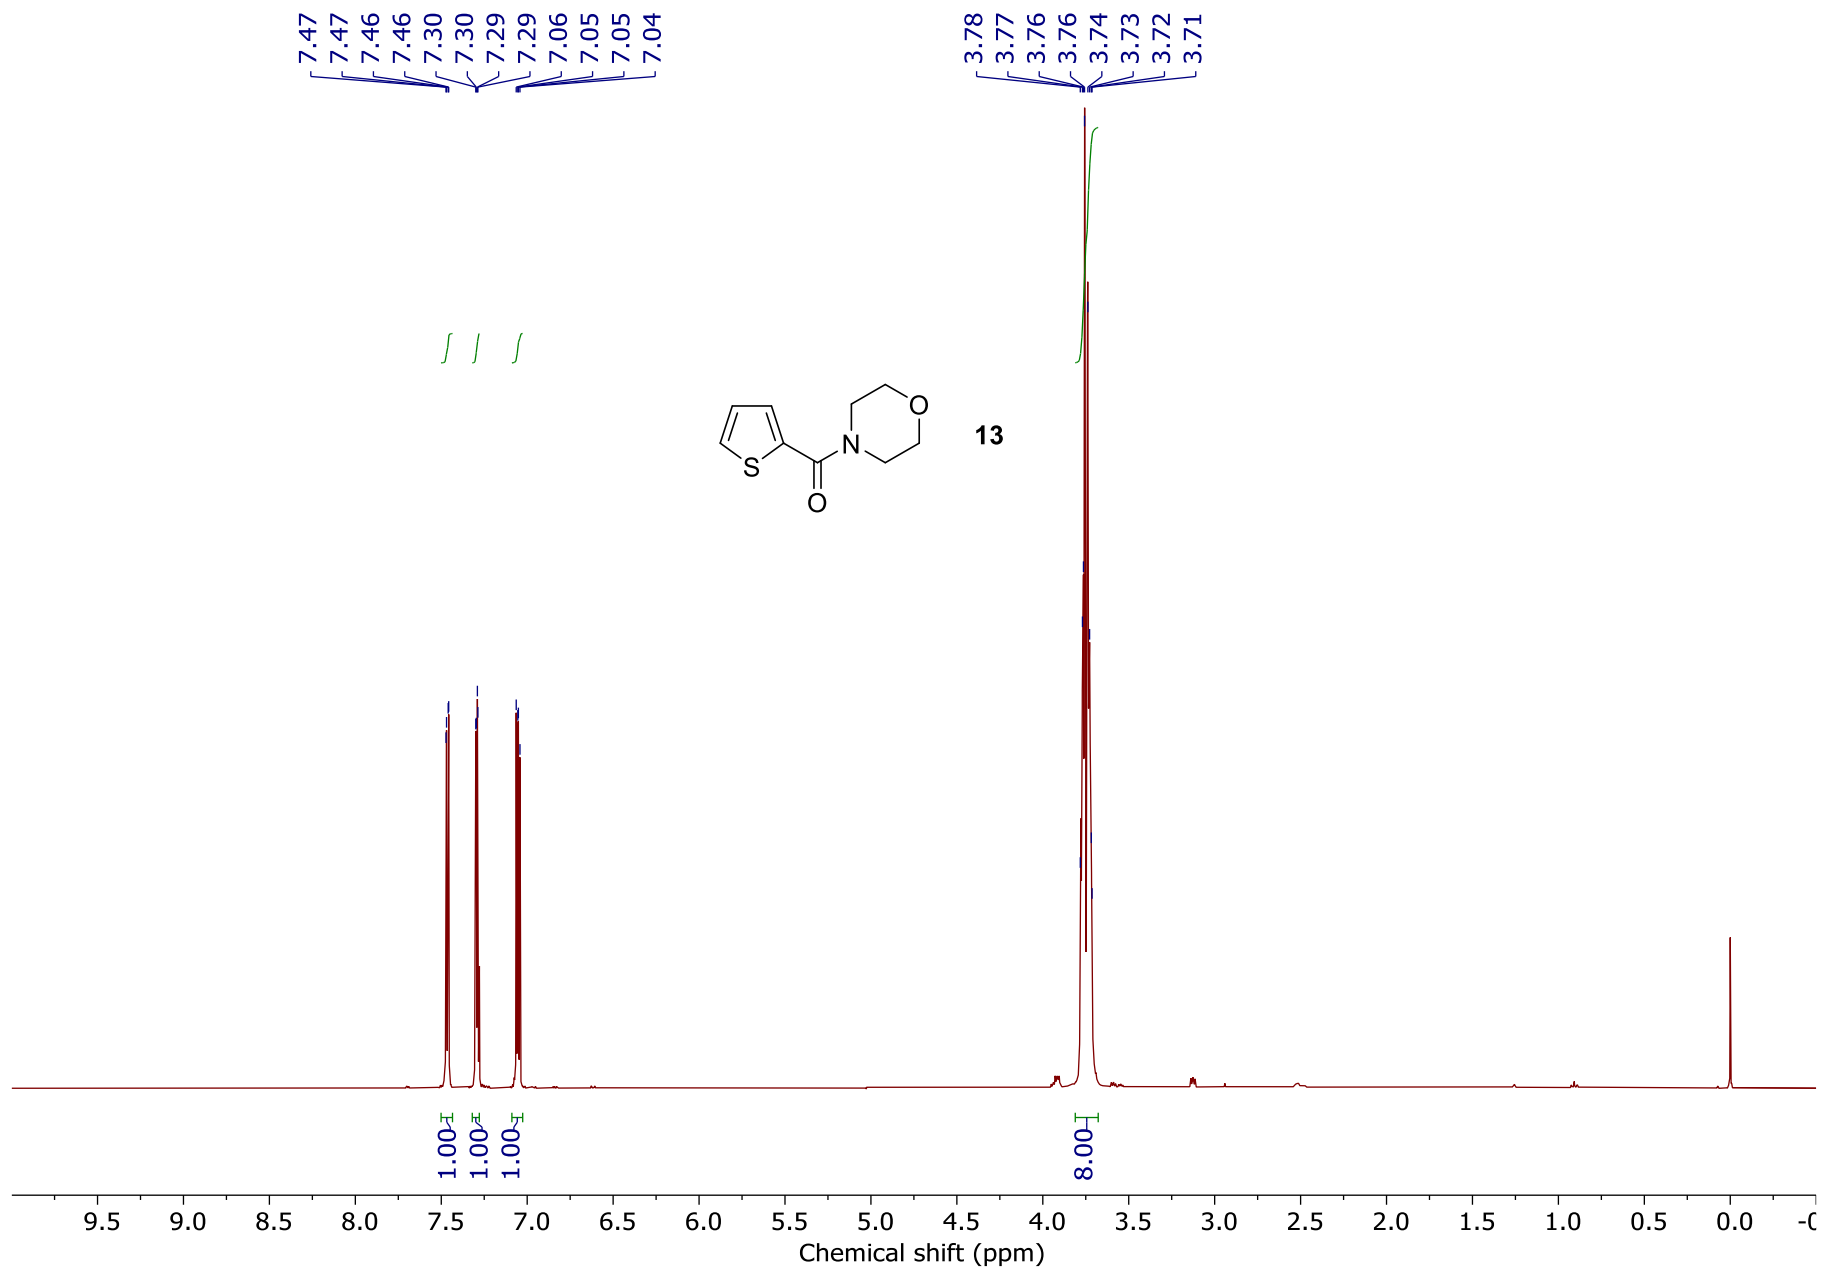

**Figure S7a.** <sup>1</sup>H NMR spectrum of compound **13** (400 MHz, CDCl<sub>3</sub>).

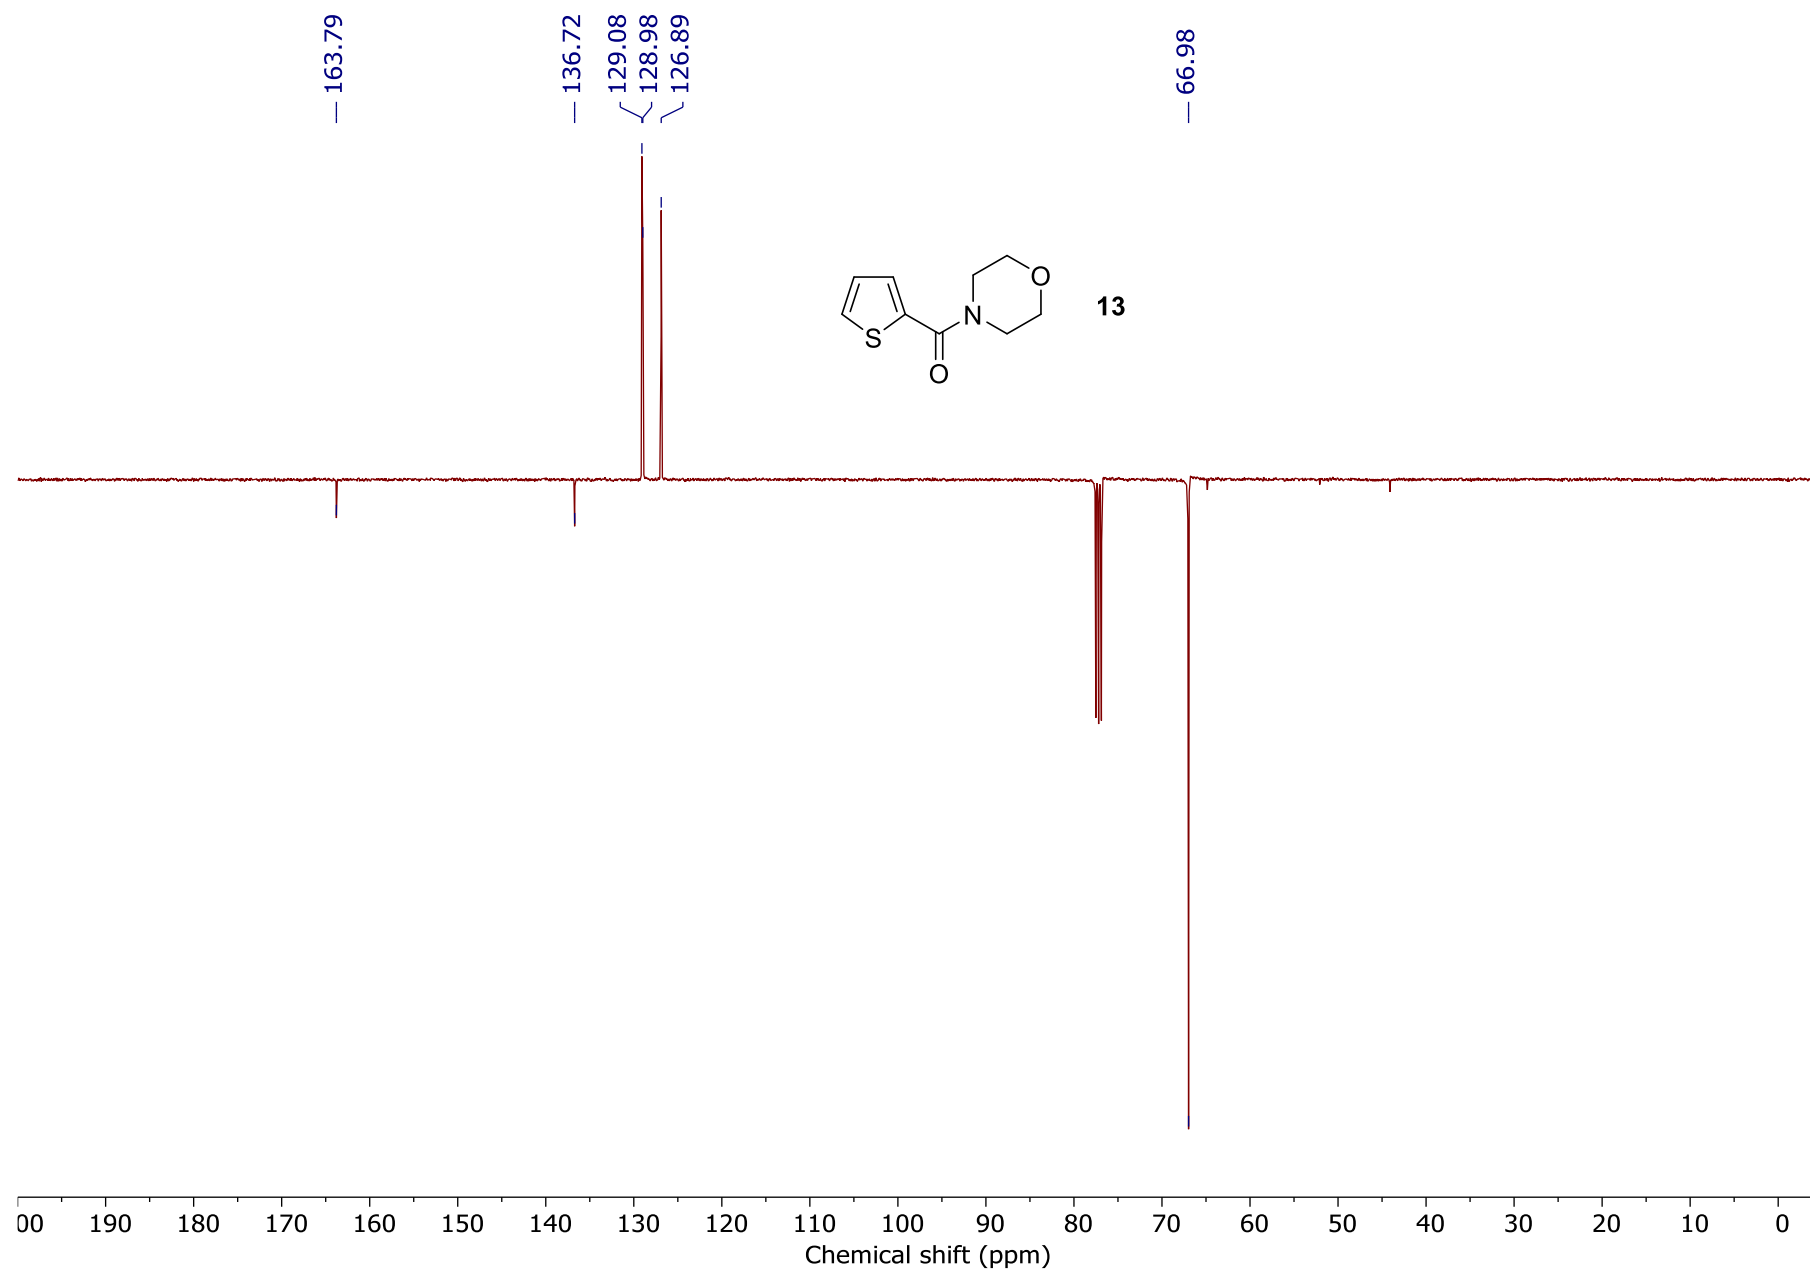

**Figure S7b.** DEPTQ NMR spectrum of compound **13** (100 MHz,  $\text{CDCl}_3$ ).

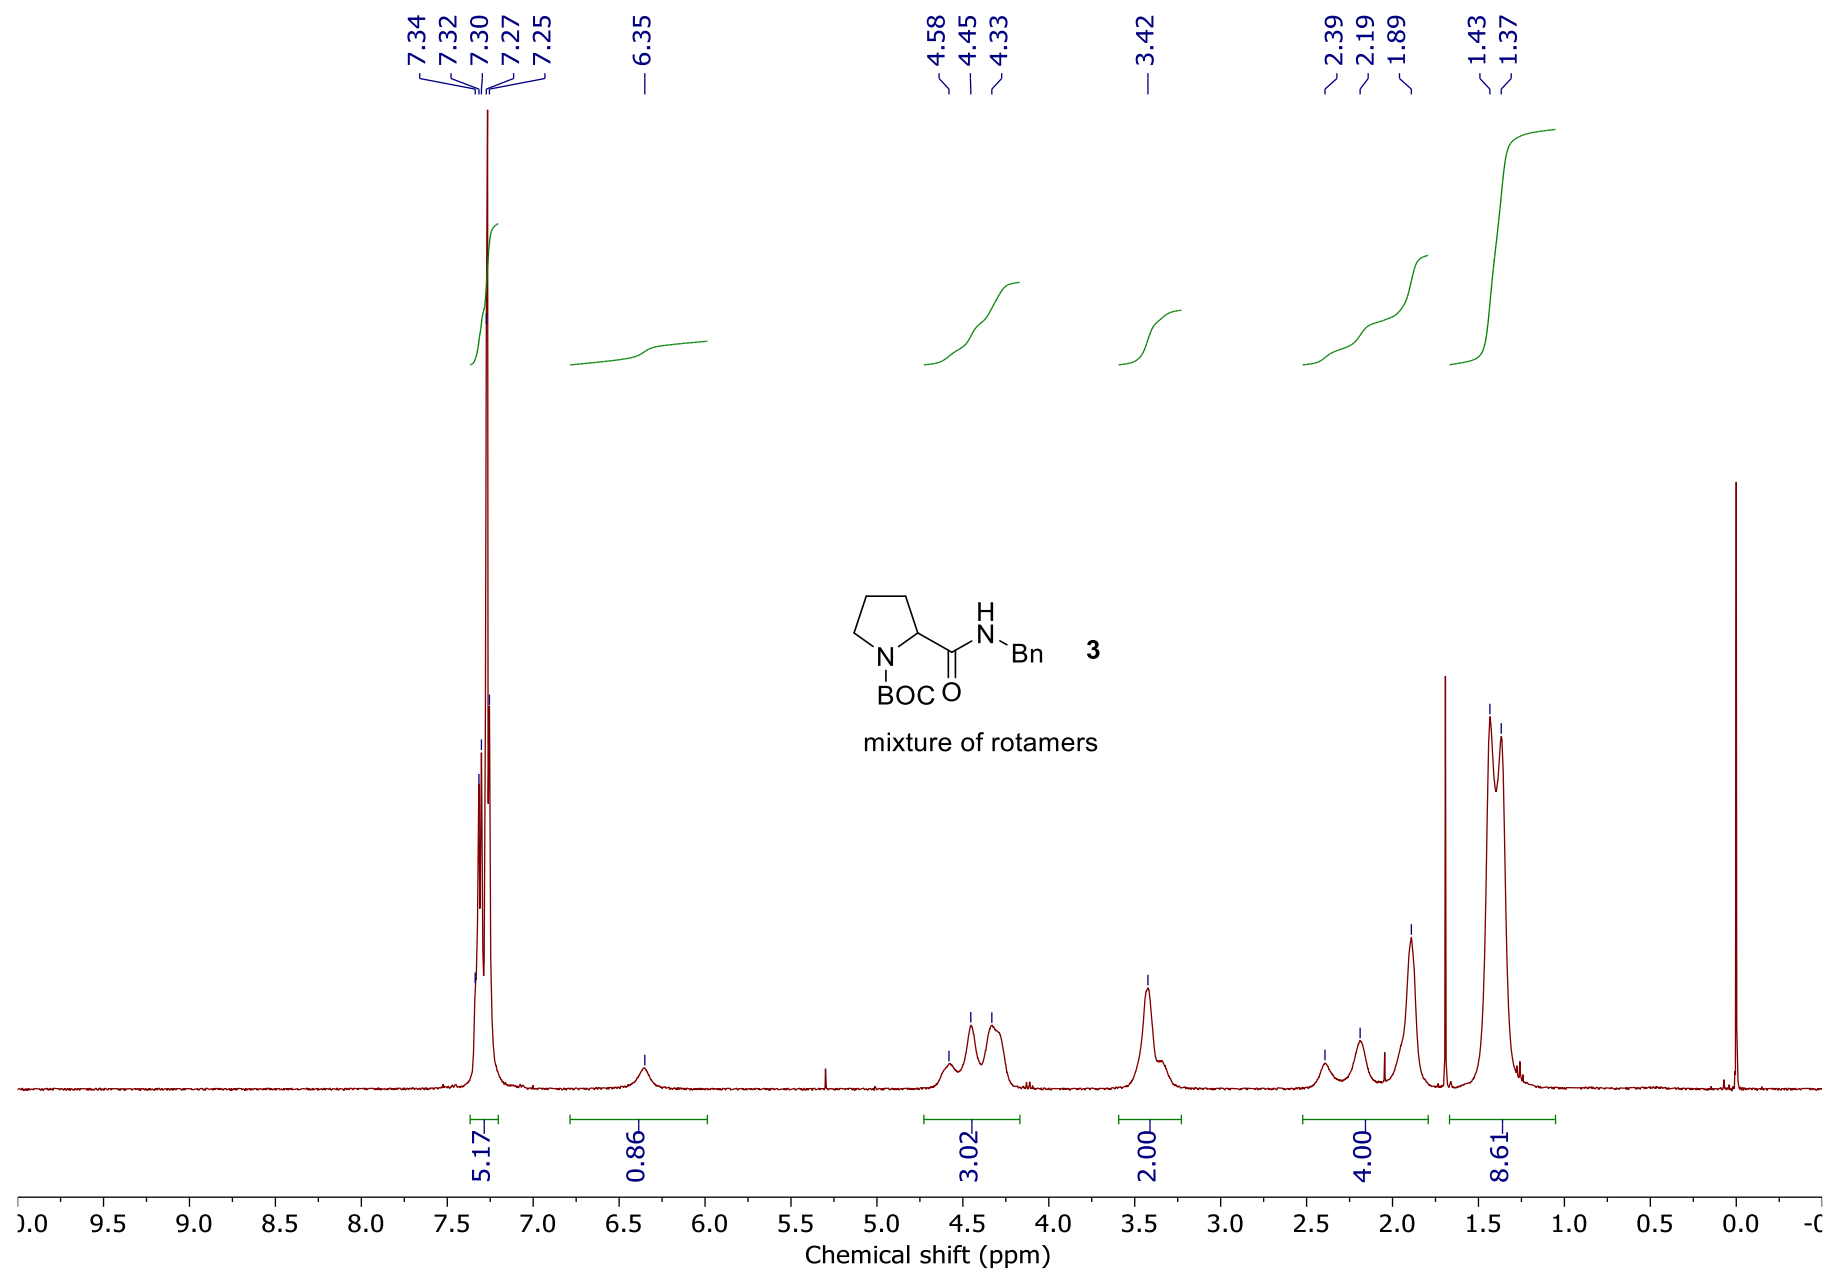

**Figure S8a.**  $^1\text{H}$  NMR spectrum of compound **3** (400 MHz,  $\text{CDCl}_3$ ).

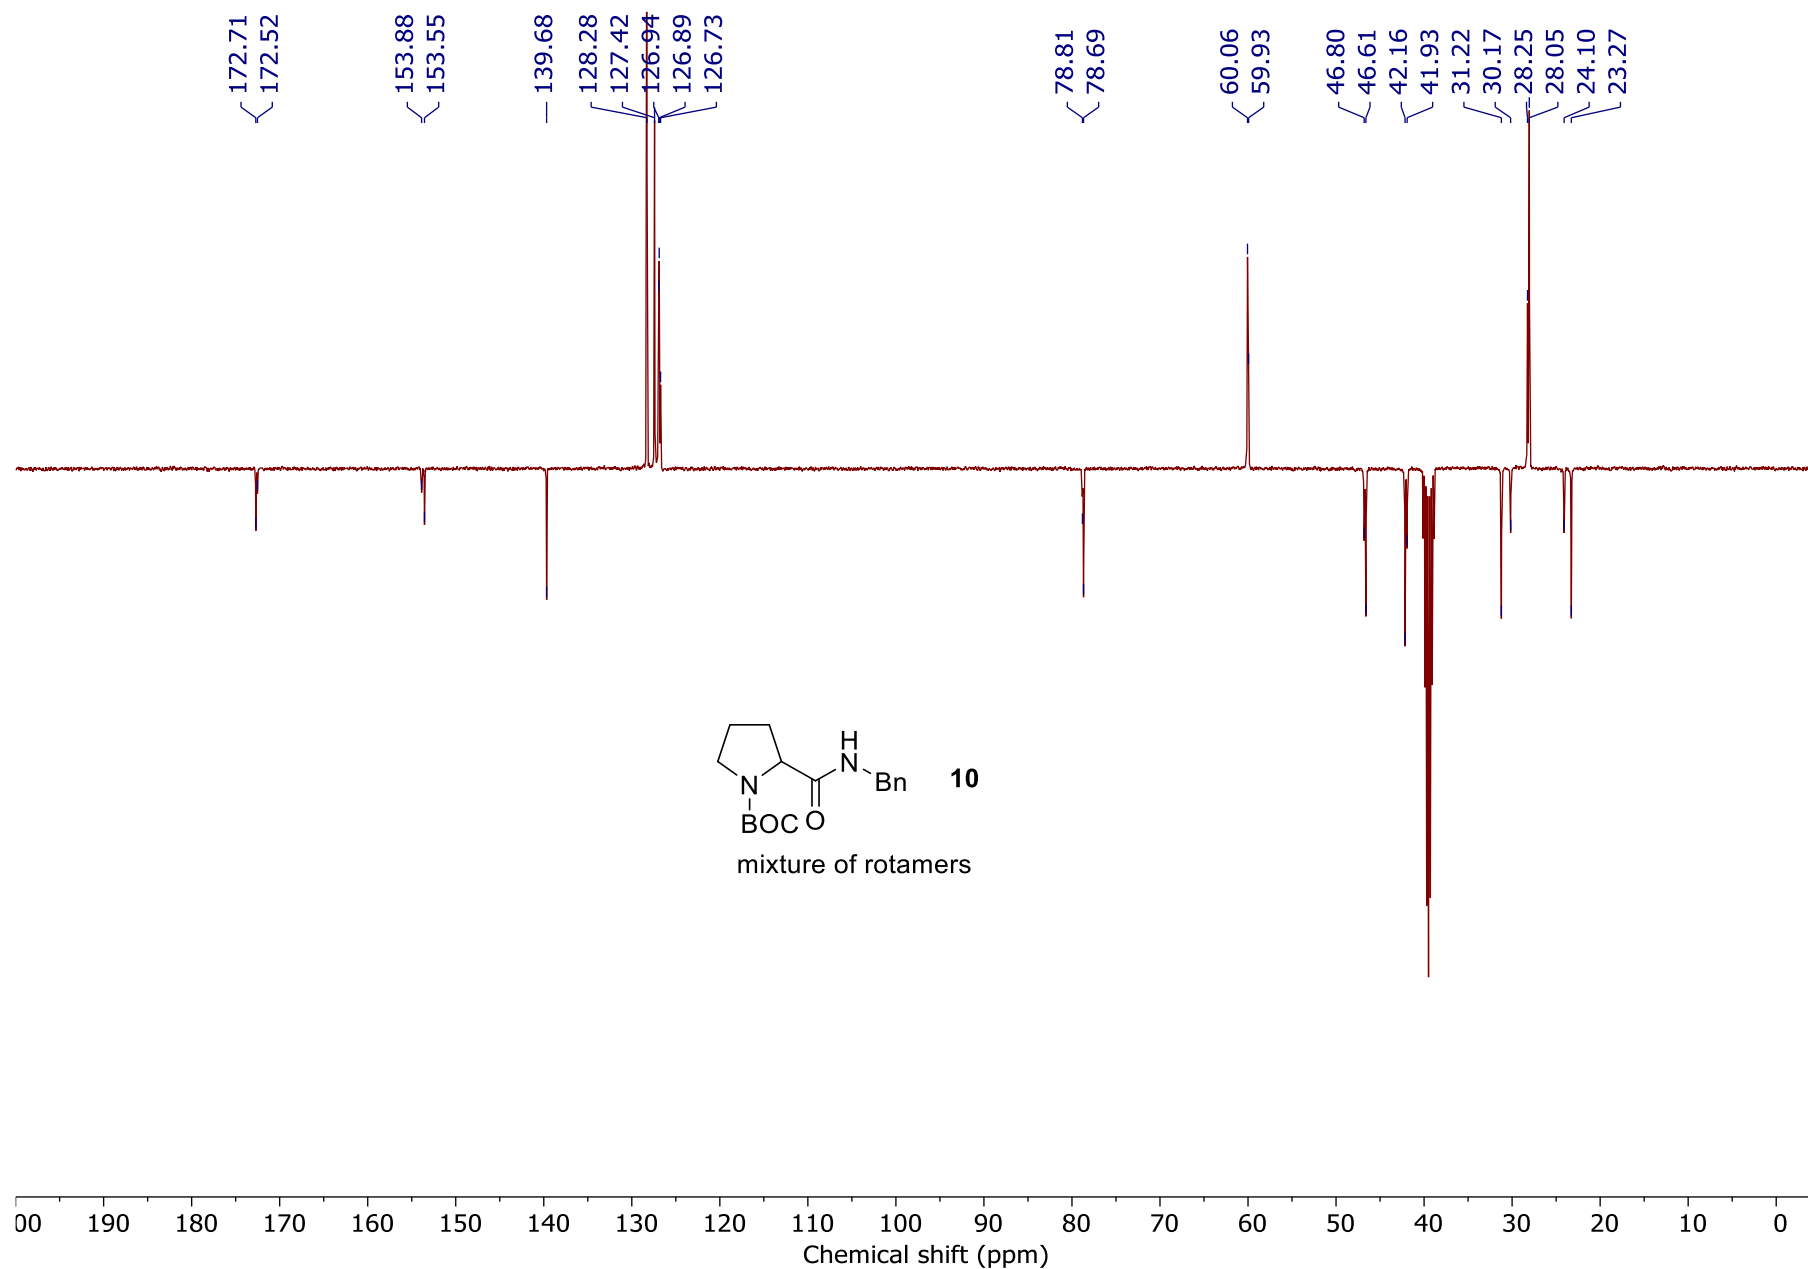

**Figure S8b.** DEPTQ NMR spectrum of compound **3** (100 MHz, DMSO- $d_6$ ).

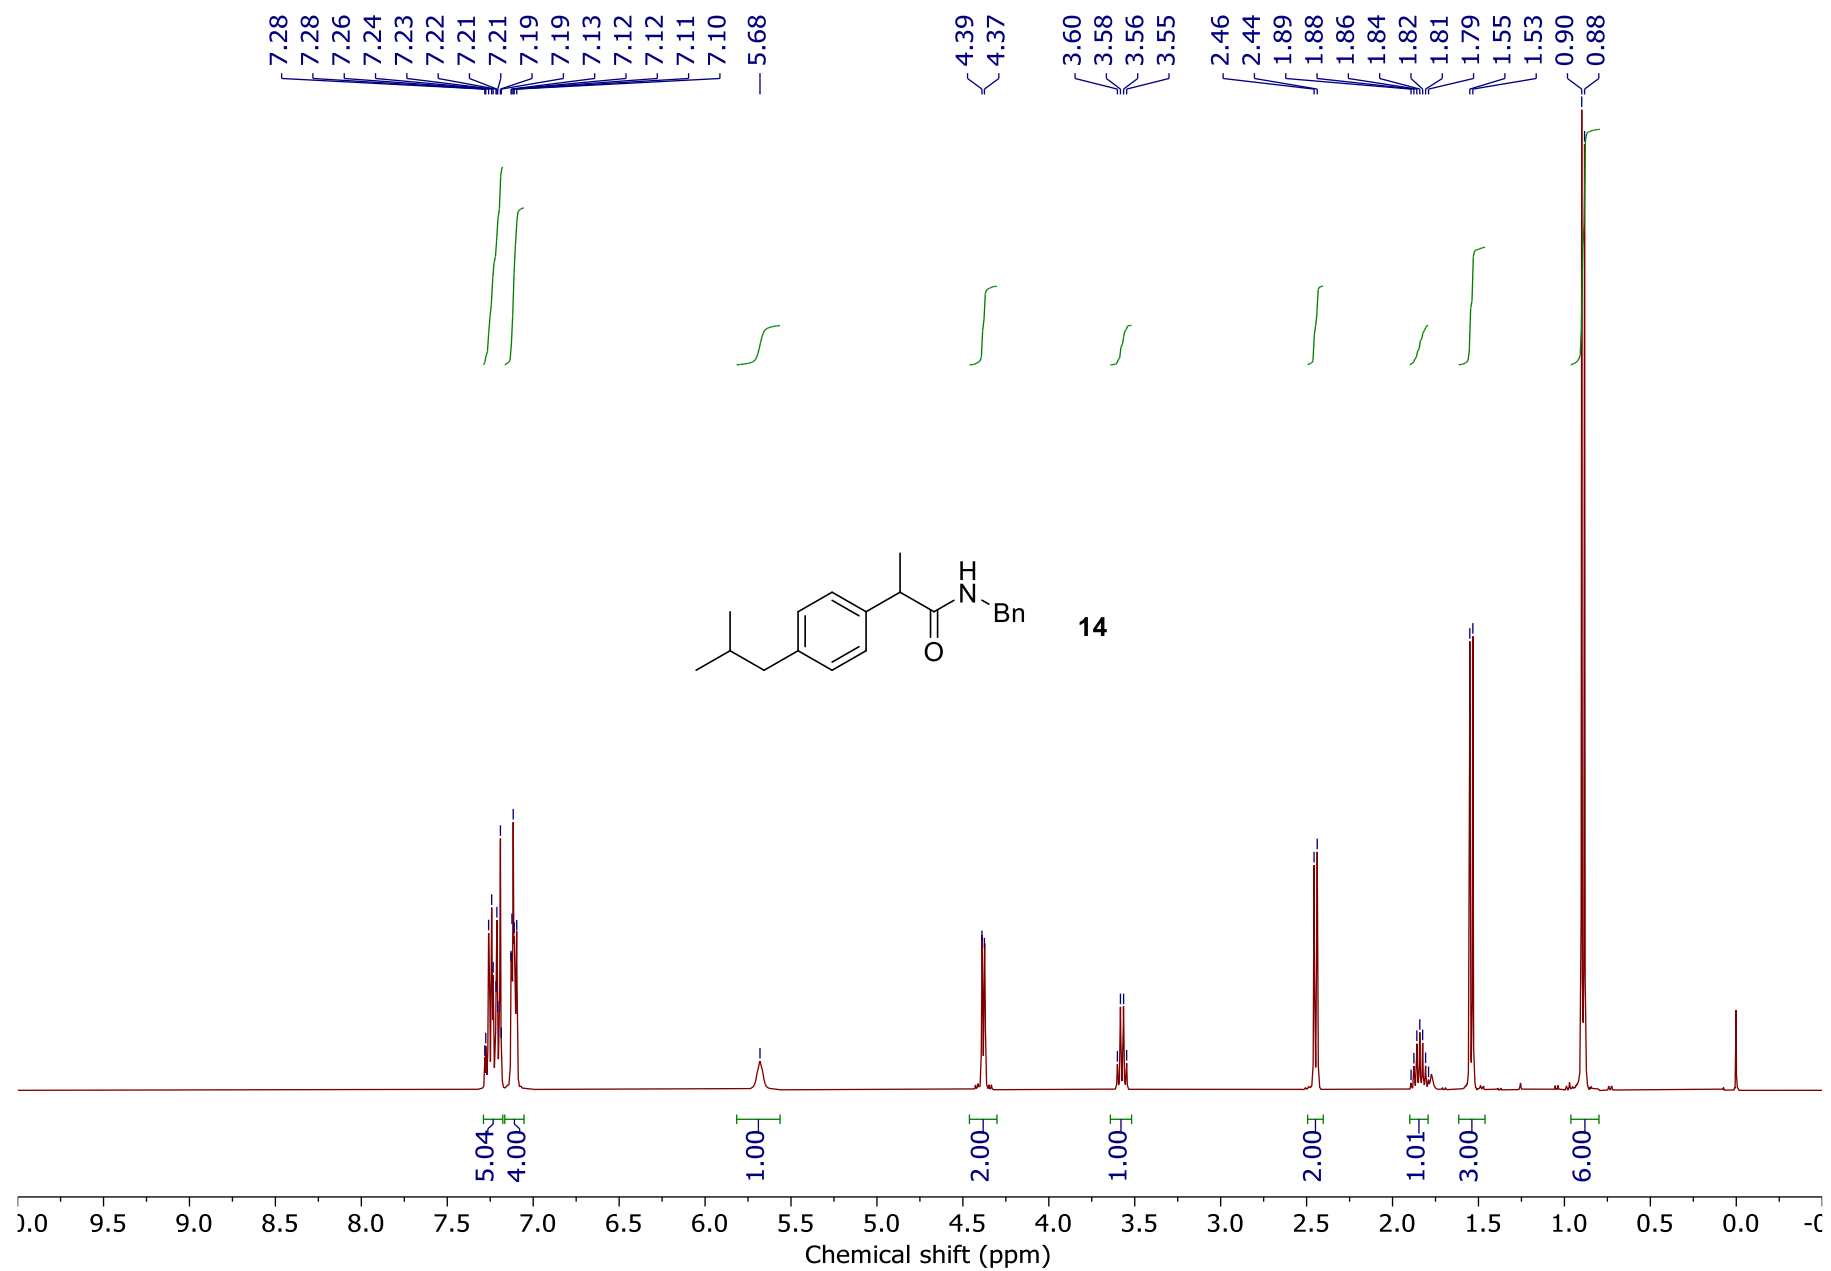

**Figure S9a.**  $^1\text{H}$  NMR spectrum of compound **14** (400 MHz,  $\text{CDCl}_3$ ).

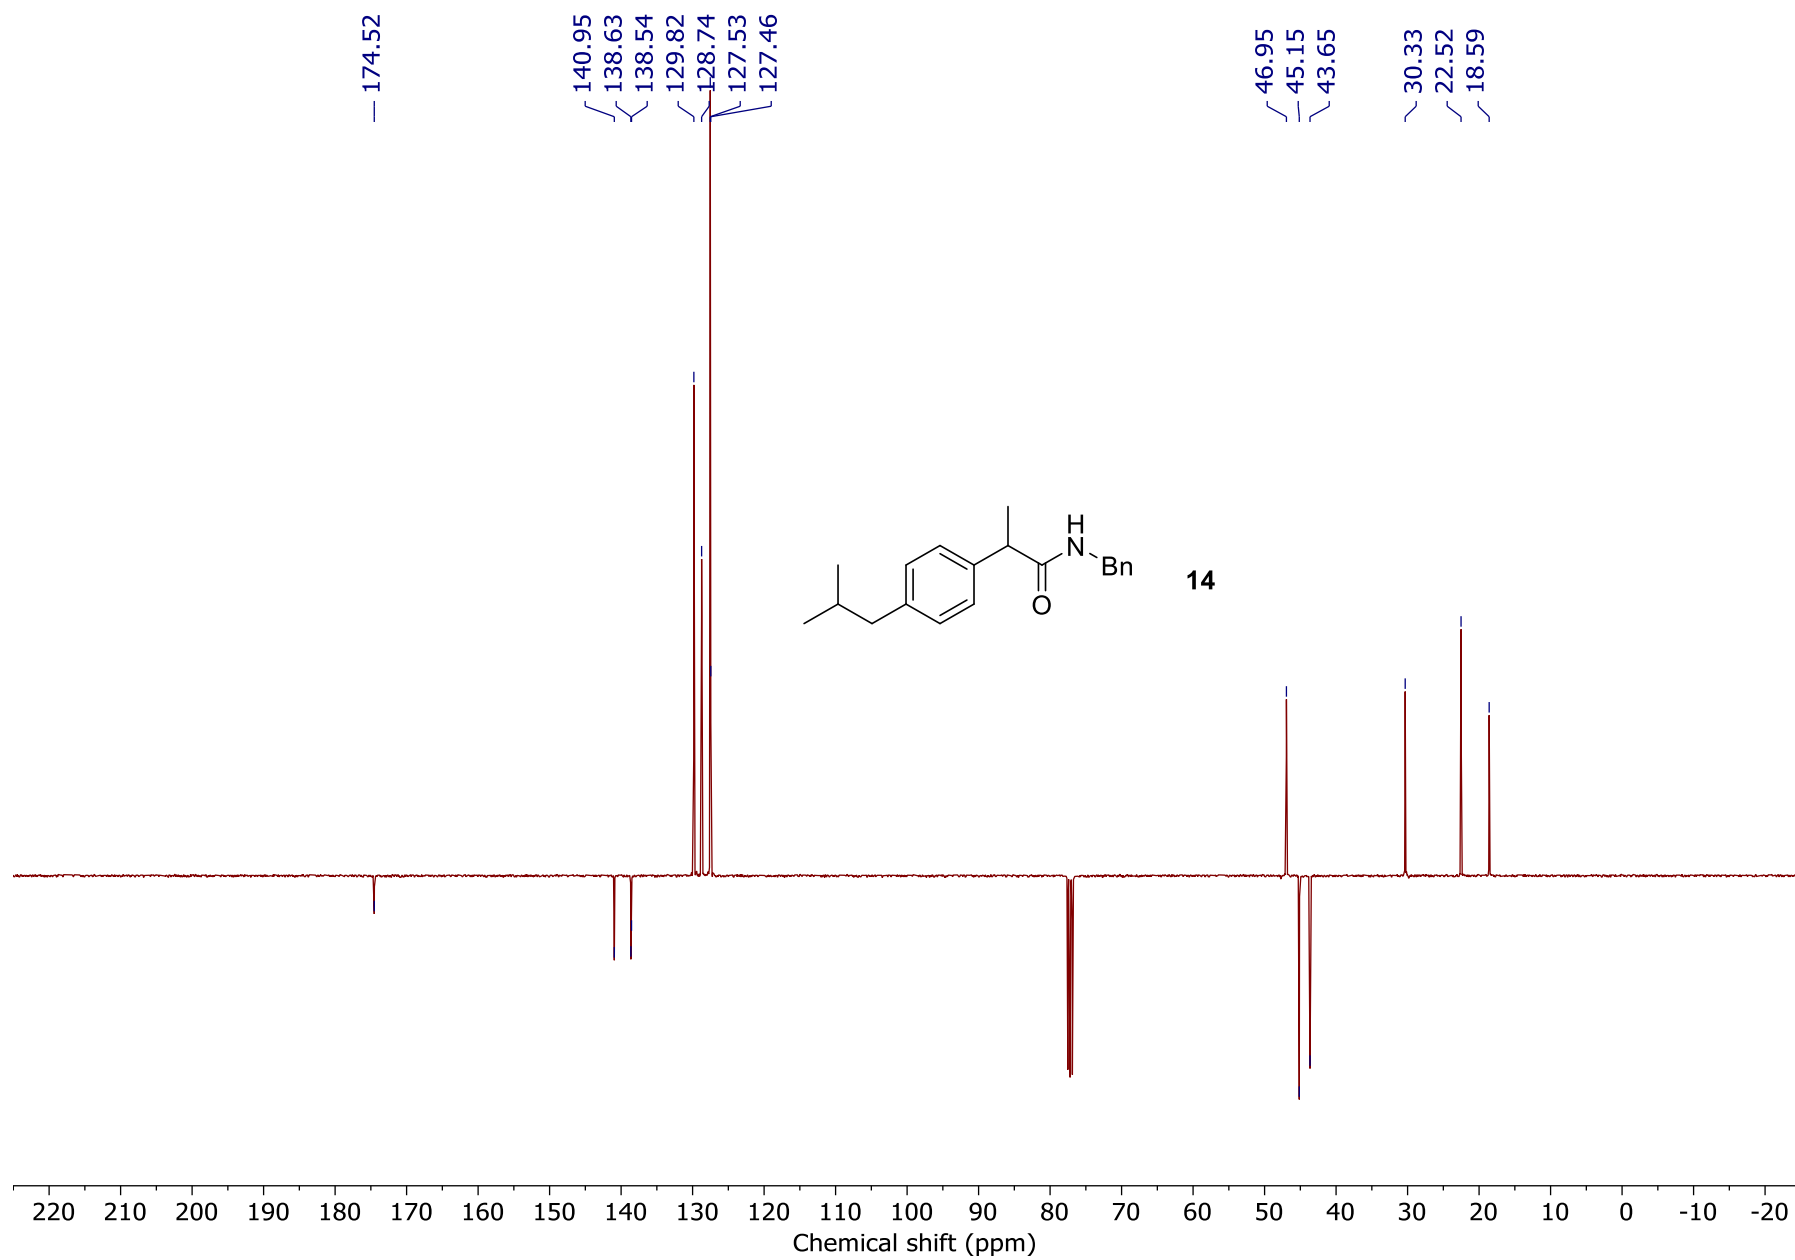

**Figure S9b.** DEPTQ NMR spectrum of compound **14** (100 MHz,  $\text{CDCl}_3$ ).

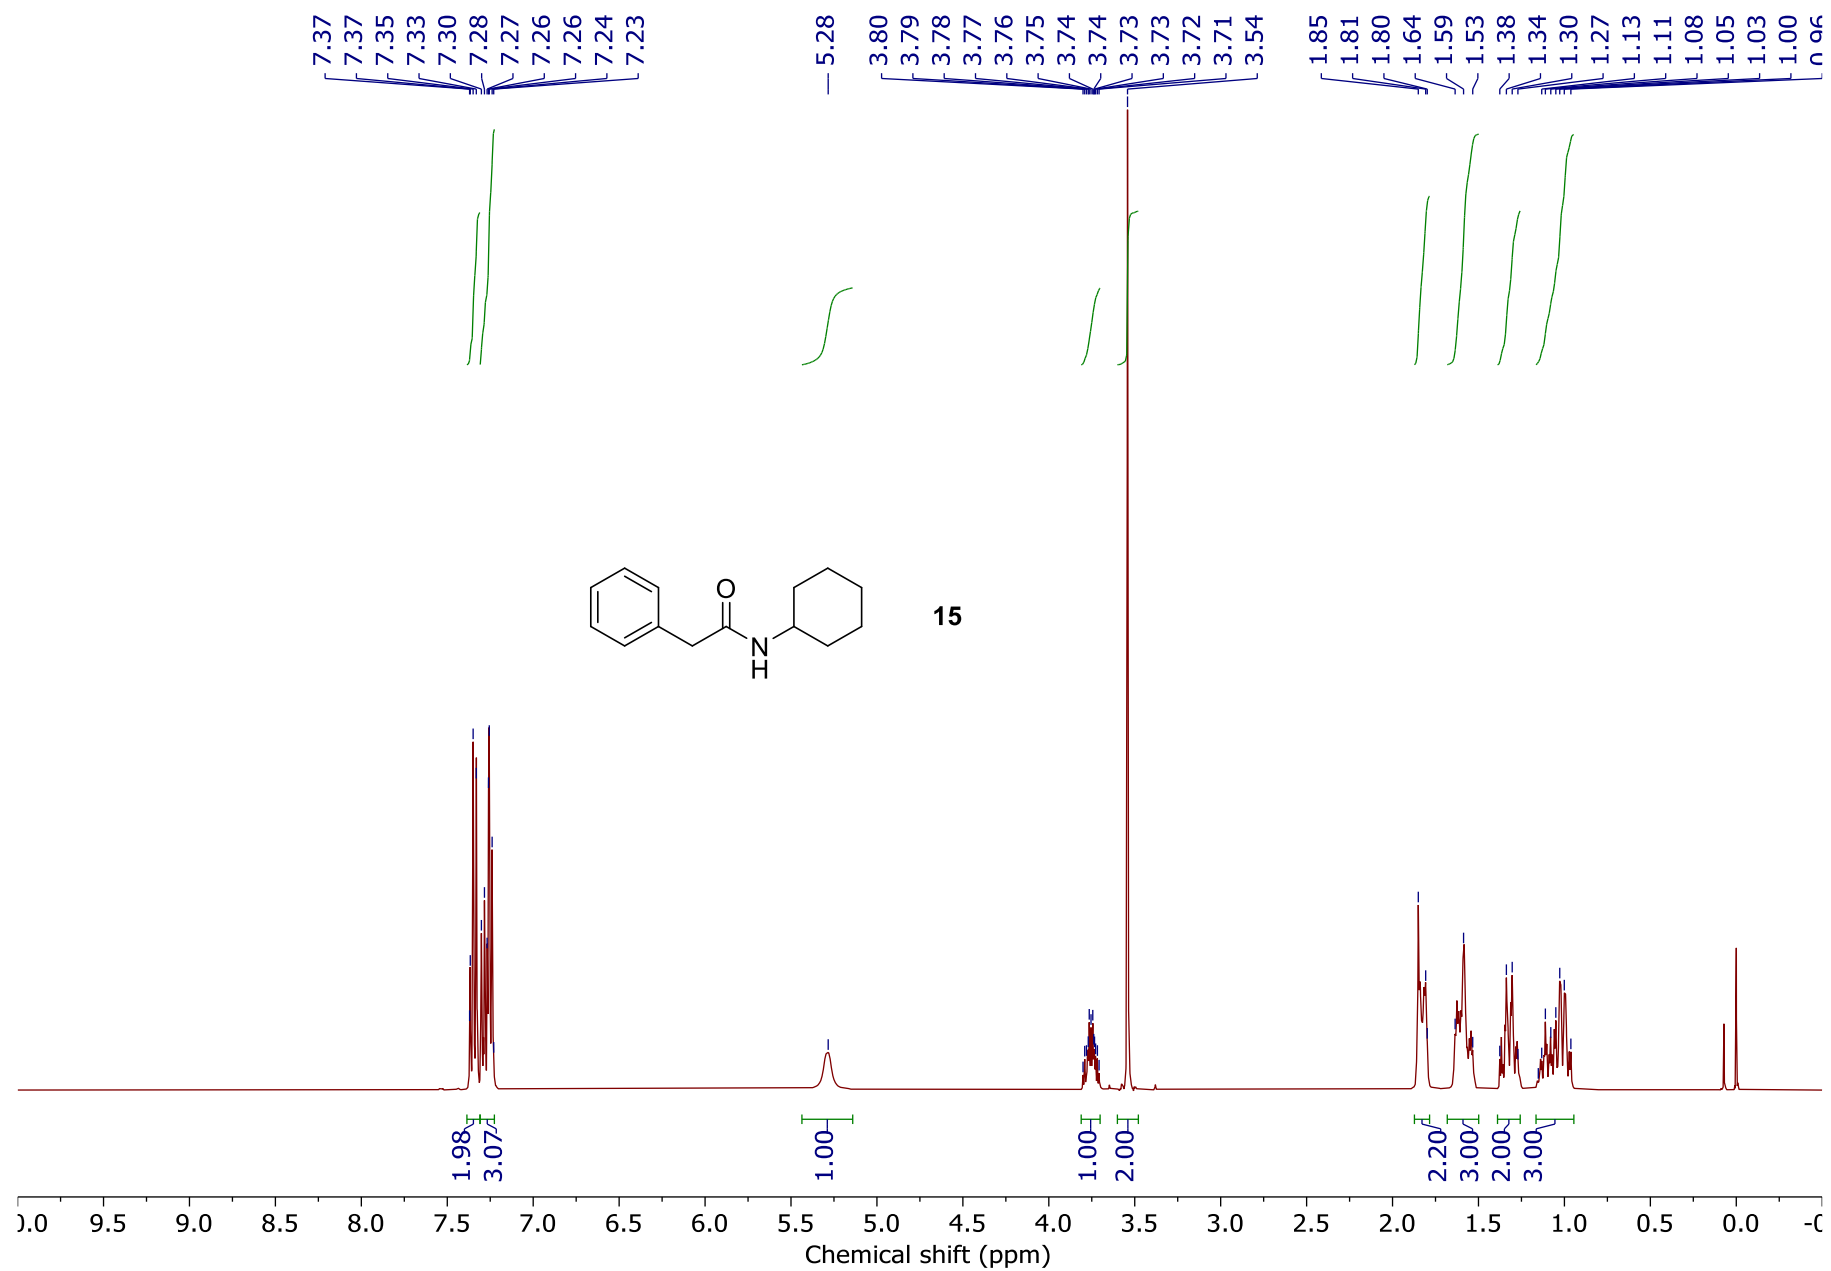

**Figure S10a.**  $^1\text{H}$  NMR spectrum of compound **15** (400 MHz,  $\text{CDCl}_3$ ).

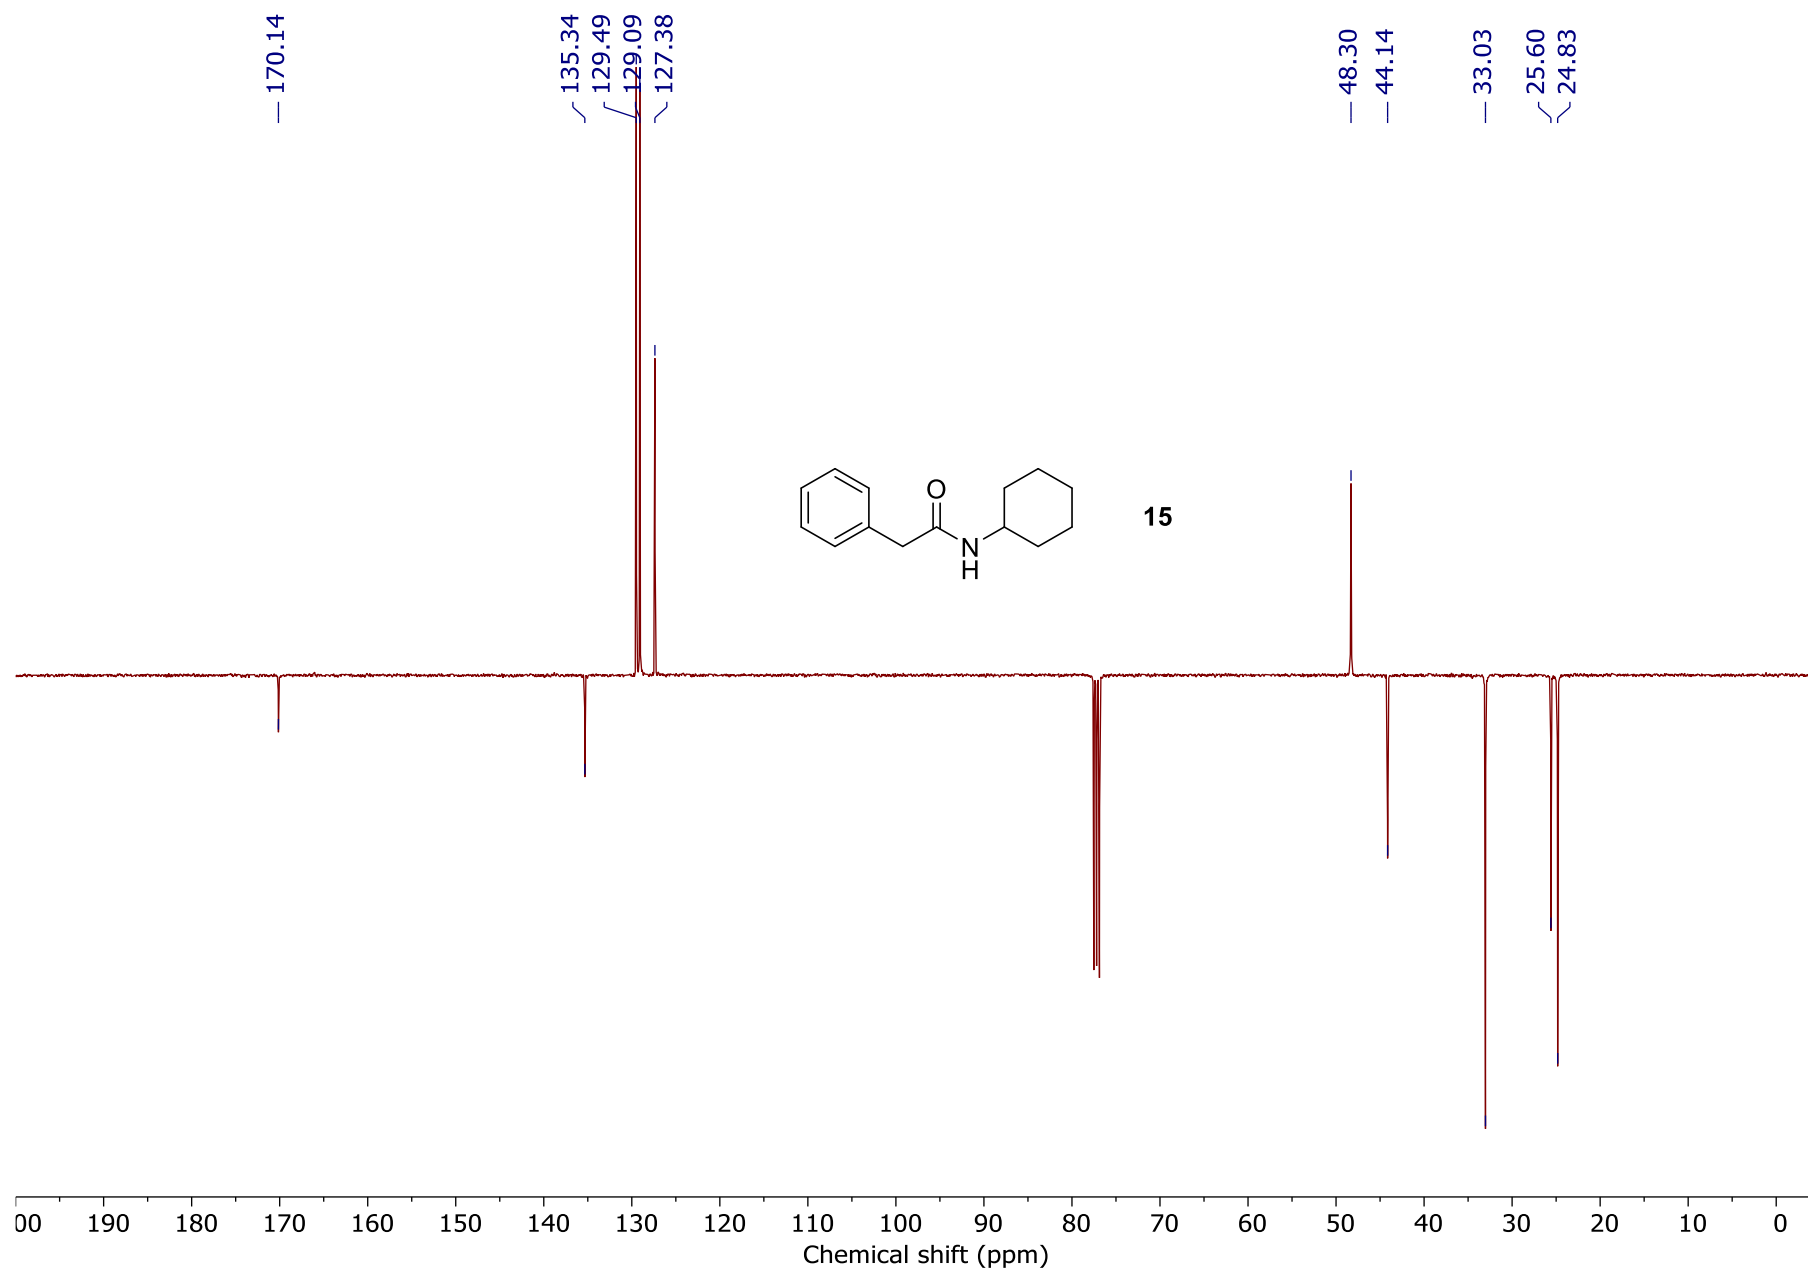

**Figure S10b.** DEPTQ NMR spectrum of compound **15** (100 MHz,  $\text{CDCl}_3$ ).

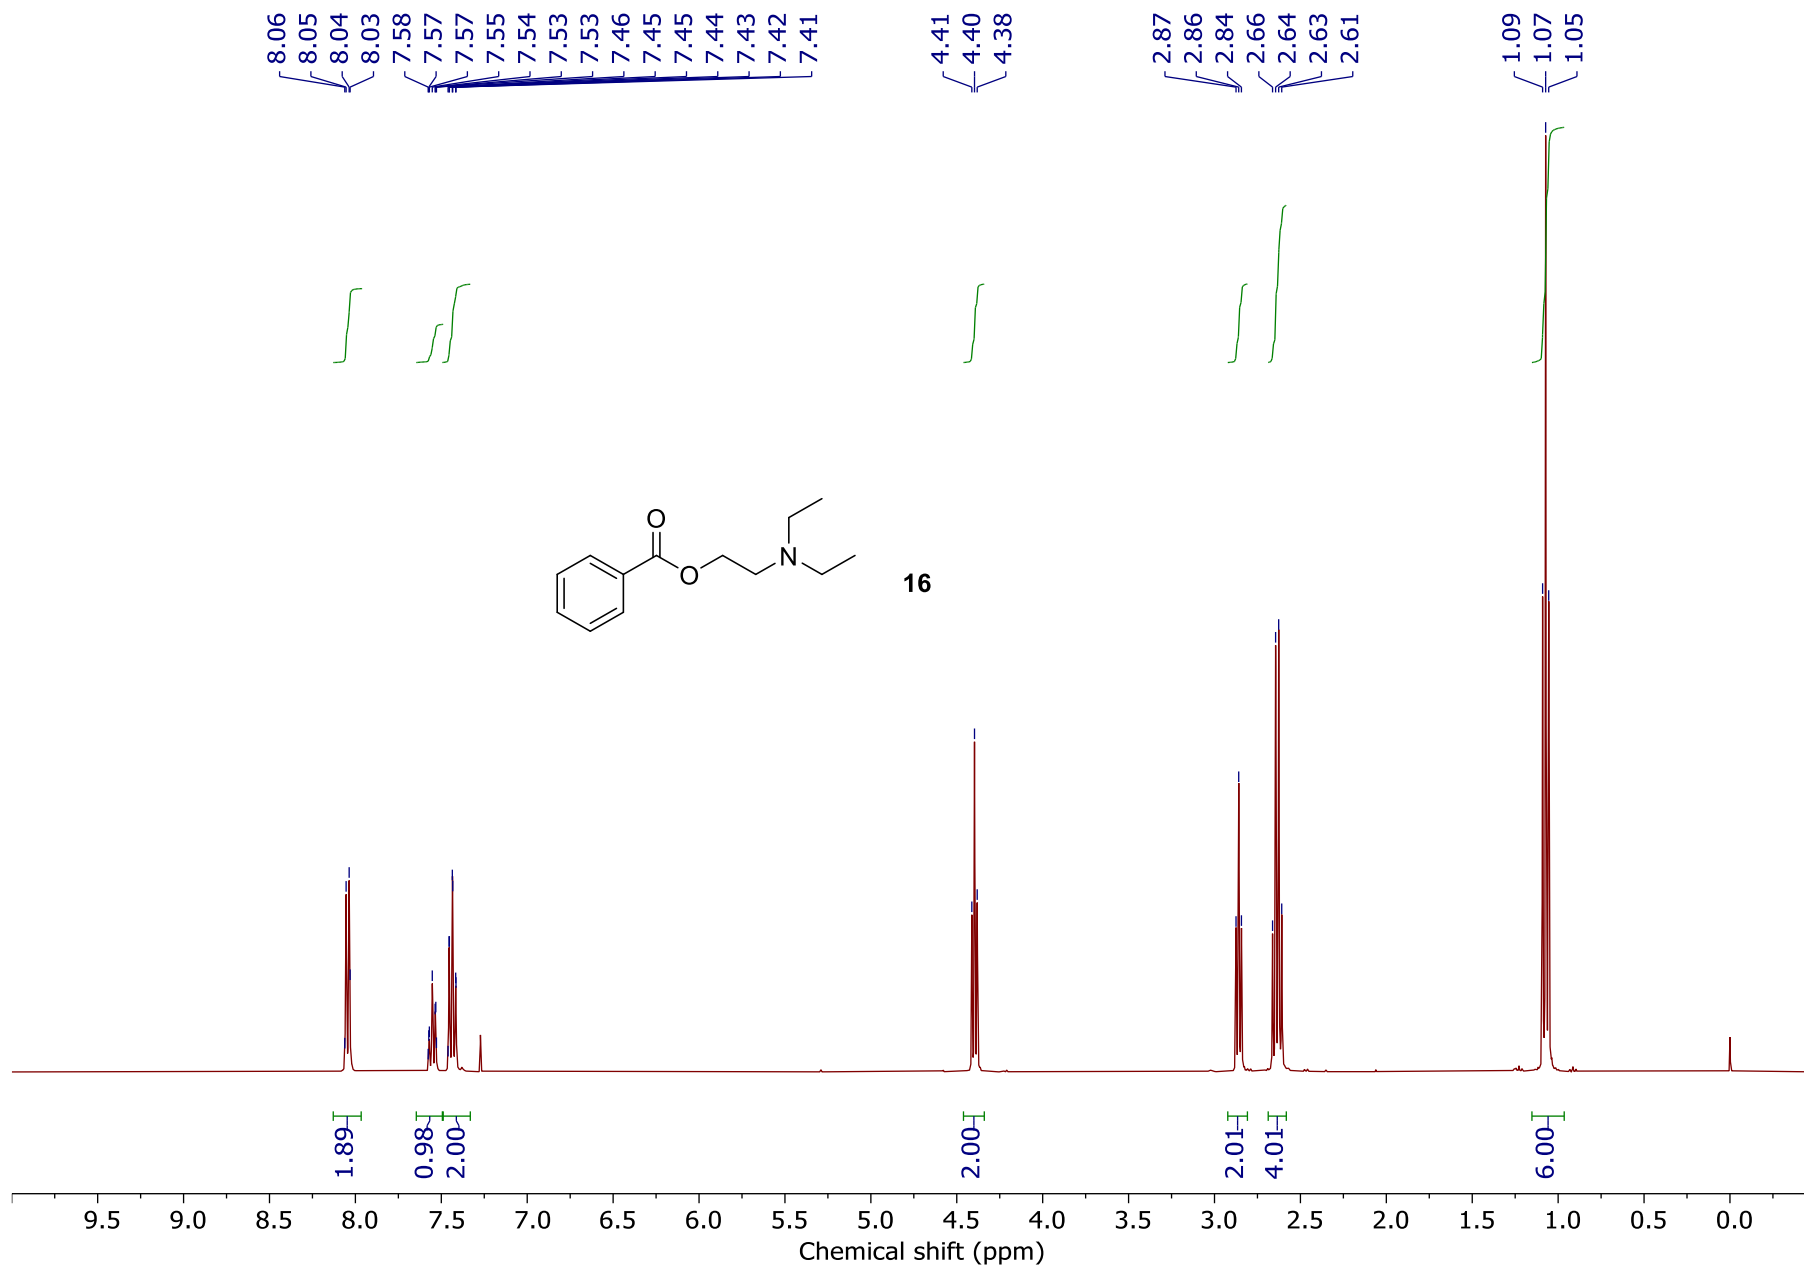

**Figure S11a.** <sup>1</sup>H NMR spectrum of compound **16** (400 MHz, CDCl<sub>3</sub>).

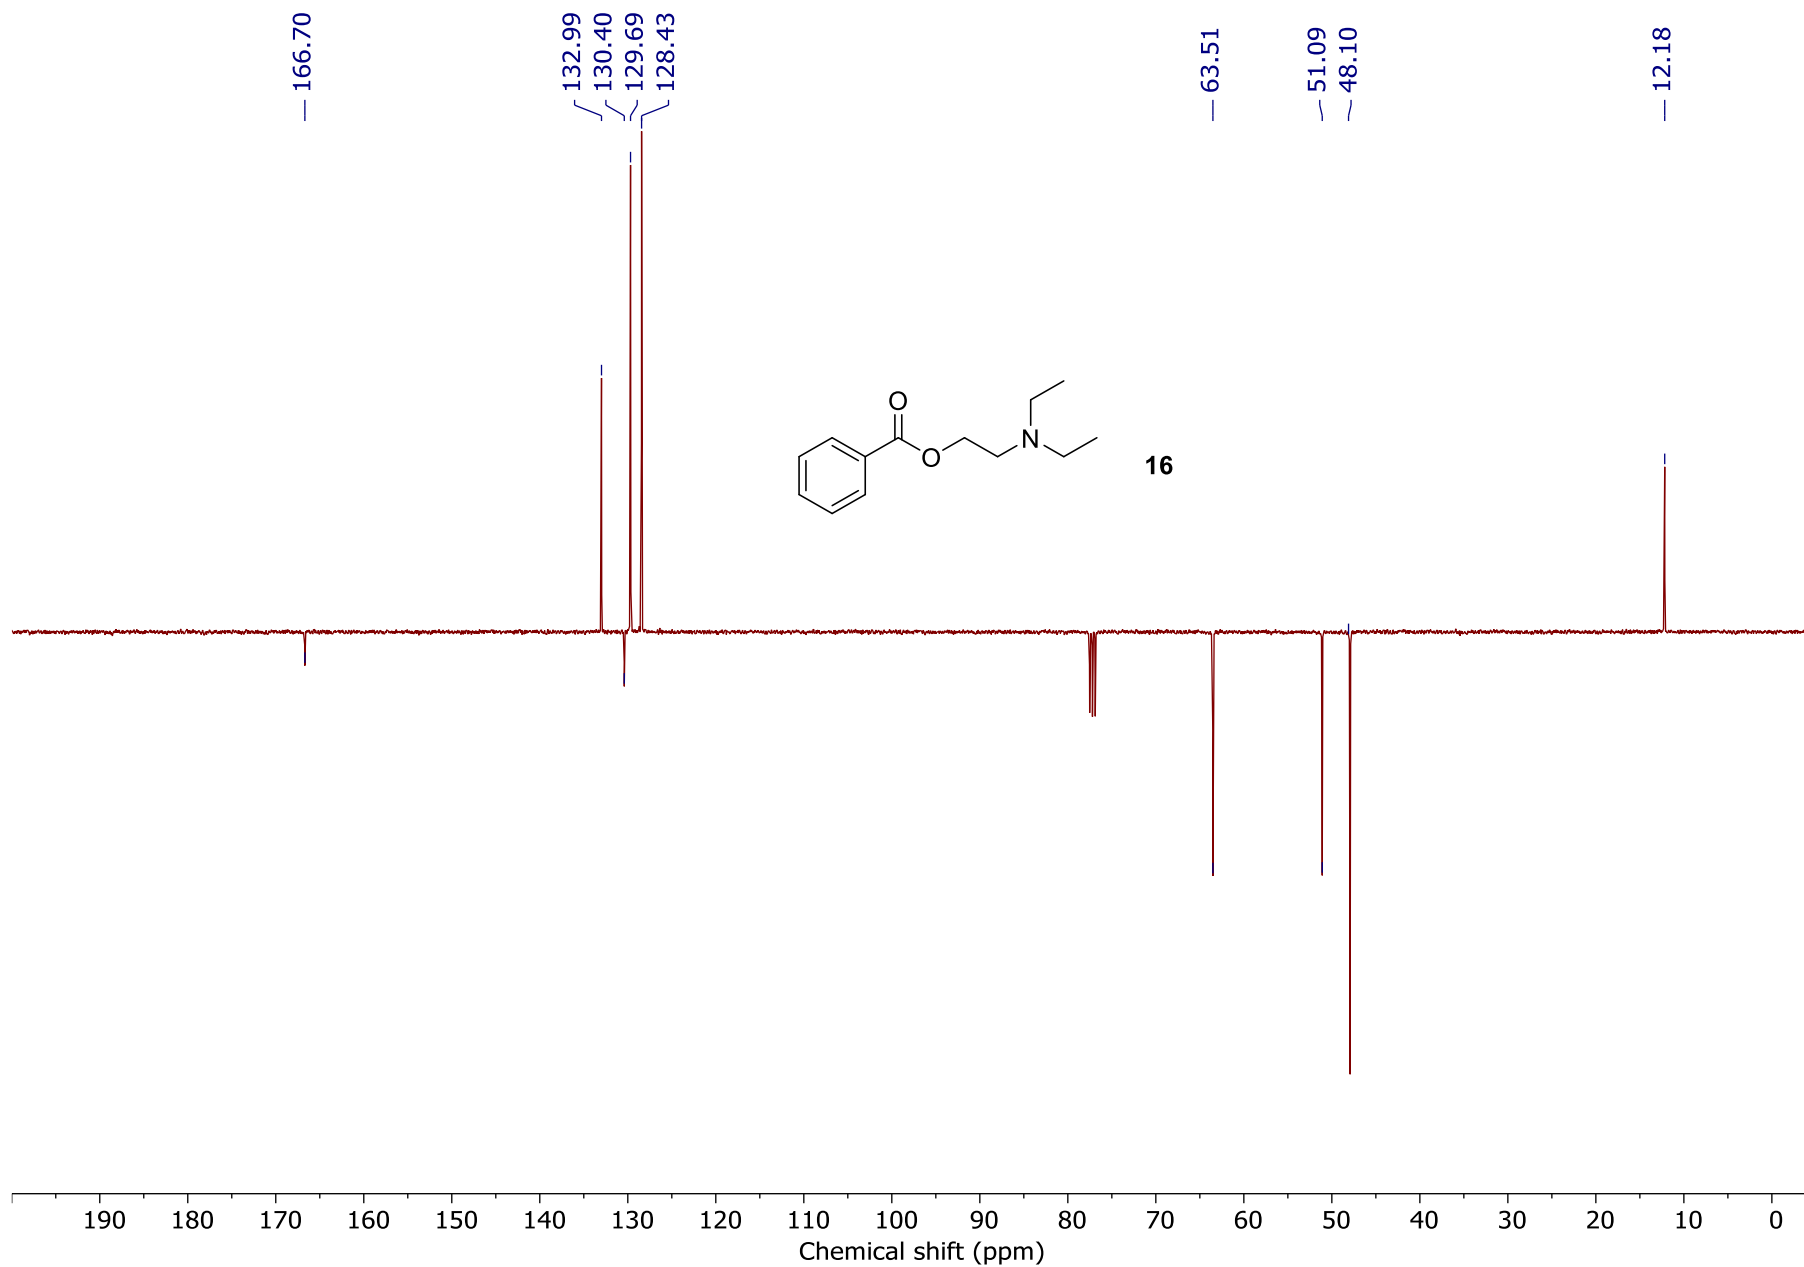

**Figure S11b.** DEPTQ NMR spectrum of compound **16** (100 MHz,  $\text{CDCl}_3$ ).

## References

1. D. Gryko and R. Lipiński, *Eur. J. Org. Chem.*, 2006, 3864–3876.
2. X. Cui, Y. Zhang, F. Shi and Y. Deng, *Chem. Eur. J.*, 2011, **17**, 1021–1028.
3. T. Maki, K. Ishihara and H. Yamamoto, *Org. Lett.*, 2005, **7**, 5043–5046.
4. G. Balboni, S. Salvadori, C. Trapella, B. I. Knapp, J. M. Bidlack, L. H. Lazarus, X. Peng and J. L. Neumeyer, *ACS Chem. Neurosci.*, 2010, **1**, 155–164.
5. W.-K. Chan, C.-M. Ho, M.-K. Wong and C.-M. Che, *J. Am. Chem. Soc.*, 2006, **128**, 14796–14797.
6. C. Bal Reddy, S. Ram, A. Kumar, R. Bharti and P. Das, *Chem. Eur. J.*, 2019, **25**, 4067–4071.
7. S. G. Sudrik, S. P. Chavan, K. R. S. Chandrakumar, S. Pal, S. K. Date, S. P. Chavan and H. R. Sonawane, *J. Org. Chem.*, 2002, **67**, 1574–1579.
8. T. Ogata, T. Asano, H. Yoshida and S. Inokawa, *Bull. Chem. Soc. Jpn.*, 1967, **40**, 997–999.
